# Supplementary material for: Sexual failure decreases sweet taste perception in male Drosophila via dopaminergic signaling
Source: eLife. 2025 Jul 23;14:RP105094. doi: 10.7554/eLife.105094 (PMC12286605; doi:10.7554/eLife.105094)
Supplement: Figure 1—figure supplement 1—source data 1. [file elife-105094-fig1-figsupp1-data1.xlsx]

## Sheet: Figure1-supplement1-A
400 mM Sucrose				800 mM Sucrose
naive	failed	satisfied		naive	failed	satisfied
0.223316	0.512869	0.279479		0.166403	0.110935	0.110935
0.155185	0.263058	0.243109		0.122821	0.114897	0.095087
0.138153	0.215746	0.317764		0.114897	0.083201	0.110935
0.299016	0.210068	0.245023		0.091125	0.071315	0.134707
0.266843	0.259273	0.25268		0.138669	0.091125	0.075277
0.238456	0.200606	0.233538		0.03962	0.106973	0.106973
0.217638	0.293338	0.331164		0.083201	0.130745	0.190174
0.228993	0.444739	0.229709		0.095087	0.071315	0.103011
0.198713	0.261166	0.130168		0.087163	0.253566	0.079239
0.20291	0.262251	0.289051		0.122821	0.079239	0.091125
0.179939	0.294793	0.246937		0.103011	0.051506	0.118859
0.206738	0.170368	0.294793		0.162441	0.126783	0.130745
0.074655	0.294793	0.166539		0.067353	0.067353	0.114897
0.195253	0.325421	0.285222		0.122821	0.118859	0.158479
0.25268	0.245023	0.195253		0.091125	0.083201	0.126783
0.212481	0.375191	0.317764		0.075277	0.095087	0.122821
0.074655	0.254594	0.281394		0.142631	0.075277	0.047544
0.133997	0.23928	0.199081		0.134707	0.190174	0.087163
0.292879	0.25268	0.31585		0.043582	0.091125	0.091125
0.200995	0.308219	0.222052		0.083201	0.075277	0.126783
0.200995	0.321537	0.361792		0.158479	0.059429	0.174326
0.340735	0.350076	0.273737		0.110935	0.170365	0.122821
0.340735	0.344368	0.193338		0.067353	0.158479	0.079239
0.285222	0.193309	0.229709		0.087163	0.075277	0.146593
0.361792	0.314126	0.241194		0.099049	0.118859	0.083201
0.273737	0.167286	0.197167		0.051506	0.103011	0.138669
0.292879	0.180297	0.216309		0.134707	0.079239	0.055468
0.313936	0.375465	0.199081		0.118859	0.067353	0.20206
0.25268	0.302974	0.281394		0.106973	0.130745	0.118859
0.249239	0.215613	0.20291		0.130745	0.118859	0.095087
0.273973	0.171004	0.340735		0.079239	0.03962	0.178288
0.253044	0.310409	0.220138		0.099049	0.083201	0.118859
0.26446	0.202602	0.359877
0.344368	0.154275	0.241194
0.210037	0.184015	0.344564
0.241636		0.361792
0.157993		0.275651
0.185874		0.246937
0.204461		0.321593
0.224907		0.300609
0.284387		0.338661
0.237918		0.325342
0.258364		0.188356
0.180297		0.332953
0.159851		0.308219
0.211896		0.163623
		0.321537
		0.262557
		0.222603
		0.194064
		0.184015
		0.16171
		0.208178
		0.20632
		0.211896
		0.208178
		0.169145
		0.202602

## Sheet: Figure1-supplement1-B
naive agar	naive sucrose	failed agar	failed sucrose	satisfied agar	satisfied sucrose
1	1	1	1	1	1
1	1	1	1	1	1
1	1	1	1	1	1
1	1	1	1	1	1
1	1	1	1	1	1
1	1	1	1	1	1
1	1	1	1	1	1
1	1	1	1	1	1
1	1	1	1	1	1
1	1	1	1	1	1
1	1	1	1	1	1
1	1	1	1	1	1
1	1	1	1	1	1
1	1	1	1	1	1
1	1	1	1	1	1
1	1	1	1	1	1
1	1	1	1	1	1
1	1	1	1	1	1
1	1	1	1	1	1
1	1	1	1	1	1
1	1	1	1	1	1
1	1	1	1	1	1
1	1	1	1	1	1
1	1	0.982143	1	1	1
1	1	0.982143	1	1	1
1	1	0.982143	1	1	1
1	1	0.982143	1	1	1
1	1	0.982143	1	1	1
1	1	0.964286	1	1	1
1	1	0.964286	1	1	1
1	1	0.964286	1	1	1
1	1	0.964286	1	1	1
1	1	0.928571	1	1	1
0.981481	1	0.857143	1	1	1
0.962963	1	0.767857	1	0.981818	1
0.962963	1	0.75	1	0.981818	1
0.962963	1	0.75	1	0.981818	1
0.962963	1	0.696429	1	0.963636	1
0.962963	1	0.642857	1	0.963636	1
0.944444	1	0.571429	1	0.963636	1
0.888889	1	0.535714	1	0.909091	1
0.851852	1	0.446429	1	0.890909	1
0.814815	1	0.375	1	0.872727	1
0.703704	1	0.303571	1	0.854545	1
0.62963	1	0.267857	1	0.8	1
0.62963	1	0.267857	1	0.709091	1
0.574074	1	0.196429	1	0.672727	1
0.481481	1	0.178571	1	0.636364	1
0.462963	1	0.160714	1	0.563636	1
0.407407	1	0.142857	1	0.527273	1
0.388889	1	0.0714286	1	0.472727	1
0.351852	1	0.0535714	1	0.418182	1
0.351852	1	0.0535714	1	0.418182	1
0.277778	1	0.0535714	1	0.4	1
0.259259	1	0.0357143	1	0.345455	1
0.240741	1	0.0357143	1	0.327273	1
0.203704	1	0.0178571	1	0.290909	1
0.203704	1	0.0178571	1	0.290909	1
0.185185	1	0	1	0.272727	1
0.166667	1	0	1	0.254545	1
0.166667	1	0	1	0.236364	1
0.148148	1	0	1	0.218182	1
0.12963	1	0	1	0.218182	1
0.111111	1	0	1	0.2	1
0.111111	1	0	1	0.181818	1
0.0925926	1	0	1	0.145455	1
0.0740741	1	0	1	0.145455	1
0.0555556	1	0	1	0.127273	1
0.037037	1	0	1	0.127273	1
0.037037	1	0	1	0.127273	1
0.037037	1	0	1	0.127273	1
0.0185185	1	0	1	0.127273	1
0.0185185	1	0	1	0.127273	1
0.0185185	1	0	1	0.127273	1
0	1	0	1	0.109091	1
0	1	0	1	0.0727273	1
0	1	0	1	0.0363636	1
0	1	0	1	0.0363636	1
0	1	0	1	0.0363636	1
0	1	0	1	0	1
0	1	0	1	0	1
0	1	0	1	0	1
0	1	0	1	0	1
0	1	0	1	0	1
0	1	0	1	0	1
0	1	0	1	0	1
0	1	0	1	0	1
0	1	0	1	0	1
0	1	0	1	0	1
0	1	0	1	0	1
0	1	0	1	0	1
0	1	0	1	0	1
0	1	0	1	0	1
0	1	0	1	0	1
0	1	0	1	0	1
0	1	0	1	0	1
0	1	0	1	0	1
0	1	0	1	0	1
0	1	0	1	0	1
0	1	0	1	0	1
0	1	0	1	0	1
0	1	0	1	0	1
0	1	0	1	0	1
0	1	0	1	0	1
0	1	0	1	0	1
0	1	0	1	0	1
0	1	0	1	0	1
0	1	0	1	0	1
0	1	0	1	0	1
0	1	0	1	0	1
0	1	0	1	0	1
0	1	0	1	0	1
0	1	0	1	0	1
0	1	0	1	0	1
0	1	0	1	0	1
0	1	0	1	0	1
0	1	0	1	0	1
0	1	0	1	0	1
0	1	0	1	0	1
0	1	0	1	0	1
0	1	0	1	0	1
0	1	0	1	0	1
0	1	0	1	0	1
0	1	0	1	0	1
0	1	0	1	0	1
0	1	0	1	0	1

## Sheet: Figure1-supplement1-C
naïve	sucrose	group1	group2	group3	group4		mean (%)	SEM (%)	number			group1	group2	group3	group4
	6.25mM	0	0	0	0		0	0	4		αS:	1.6231	0.957832	1.68885	1.78703
	12.5mM	0.285714	0.125	0.076923	0.181818		16.7364	4.4898	4		MAT	18.62	32.2632	33.7924	25.2664
	25mM	0.714286	0.5	0.307692	0.454545		49.4131	8.4078	4
	50mM	0.857143	0.75	0.769231	0.909091		82.1366	3.74019	4
	100mM	0.857143	0.75	0.846154	0.909091		84.0597	3.31711	4
	200mM	1	0.75	1	1		93.75	6.25	4
	400mM	1	1	1	1		100	0	4
	800mM	1	1	1	1		100	0	4
failed	sucrose	group1	group2	group3	group4		mean (%)	SEM (%)	number
	6.25mM	0	0	0	0		0	0	4			group1	group2	group3	group4
	12.5mM	0	0	0	0		0	0	4		αS:	2.2434	3.07008	1.97057	2.52487
	25mM	0.1	0	0	0		2.5	2.5	4		MAT	110.006	118.769	162.582	96.392
	50mM	0.1	0.076923	0.083333	0.076923		8.42948	0.544874	4
	100mM	0.4	0.307692	0.166667	0.538462		35.3205	7.81973	4
	200mM	0.9	0.923077	0.666667	0.923077		85.3205	6.24169	4
	400mM	1	1	0.916667	1		97.9167	2.08332	4
	800mM	1	1	0.916667	1		97.9167	2.08332	4
satisfied	sucrose	group1	group2	group3	group4		mean (%)	SEM (%)	number			group1	group2	group3	group4
	6.25mM	0	0	0	0		0	0	4		αS:	1.55778	2.15697	1.30446	1.3387
	12.5mM	0	0.166667	0.076923	0		6.08975	3.96453	4		MAT	62.7768	37.2739	36.6099	73.4755
	25mM	0	0.166667	0.384615	0.2		18.7821	7.88461	4
	50mM	0.5	0.75	0.615385	0.333333		54.968	8.83739	4
	100mM	0.625	0.916667	0.846154	0.533333		73.0288	9.03875	4
	200mM	1	1	1	1		100	0	4
	400mM	1	1	1	1		100	0	4
	800mM	1	1	1	1		100	0	4

## Sheet: Figure1-supplement1-D
naïve	D-Fructose	group1	group2	group3	group4	group5		mean (%)	SEM (%)	number
	1.6M	0.153846	0	0	0	0.1		5.07692	3.22343	5
	2.4M	0.461538	0	0.0666667	0.1	0.3		18.5641	8.51907	5
	3.2M	0.769231	0	0.266667	0.3	0.4		34.718	12.4531	5
	4M	0.769231	0.25	0.266667	0.4	0.5		43.718	9.47886	5
	4.8M	0.846154	0.375	0.466667	0.6	0.5		55.7564	8.06196	5
	5.6M	0.846154	0.6875	0.533333	0.7	0.6		67.3397	5.27999	5
	6.4M	0.846154	0.6875	0.533333	0.7	0.8		71.3397	5.40359	5
failed	D-Fructose	group1	group2	group3	group4	group5		mean (%)	SEM (%)	number
	1.6M	0	0	0	0	0		0	0	5
	2.4M	0	0	0	0	0		0	0	5
	3.2M	0.111111	0	0	0.1	0		4.22222	2.59153	5
	4M	0.222222	0	0.0833333	0.2	0		10.1111	4.75446	5
	4.8M	0.333333	0.142857	0.333333	0.3	0.1		24.1905	5.00204	5
	5.6M	0.333333	0.142857	0.333333	0.3	0.2		26.1905	3.85096	5
	6.4M	0.333333	0.142857	0.333333	0.4	0.2		28.1905	4.75809	5
satisfied	D-Fructose	group1	group2	group3	group4	group5		mean (%)	SEM (%)	number
	1.6M	0	0	0	0	0		0	0	5
	2.4M	0.125	0.0833333	0.153846	0.1	0.2		13.2436	2.06661	5
	3.2M	0.125	0.0833333	0.384615	0.1	0.3		19.859	6.0543	5
	4M	0.375	0.166667	0.615385	0.2	0.6		39.141	9.51554	5
	4.8M	0.625	0.25	0.846154	0.6	0.7		60.4231	9.83939	5
	5.6M	0.625	0.416667	0.923077	0.6	0.7		65.2949	8.20356	5
	6.4M	0.625	0.416667	0.923077	0.7	0.8		69.2949	8.52694	5

## Sheet: Figure1-supplement1-E
naïve	D-Glucose	group1	group2	group3	group4		mean (%)	SEM (%)	number
	200mM	0.1875	0.071429	0	0.071429		8.25895	3.88119	4
	400mM	0.25	0.142857	0.357143	0.142857		22.3214	5.12908	4
	800mM	0.375	0.357143	0.5	0.428571		41.5179	3.2089	4
	1.6M	0.75	0.642857	0.714286	0.571429		66.9643	3.95956	4
	3.2M	0.875	0.642857	0.857143	0.785714		79.0178	5.27593	4
	4.8M	0.875	0.785714	1	0.928571		89.7321	4.51607	4
	6.4M	0.875	0.785714	1	0.928571		89.7321	4.51607	4
	9.6M	0.875	0.785714	1	0.928571		89.7321	4.51607	4
failed	D-Glucose	group1	group2	group3	group4		mean (%)	SEM (%)	number
	200mM	0	0	0	0		0	0	4
	400mM	0	0.1	0.083333	0		4.58333	2.66796	4
	800mM	0.076923	0.1	0.083333	0		6.5064	2.22266	4
	1.6M	0.153846	0.4	0.333333	0.1		24.6795	7.13845	4
	3.2M	0.461538	0.7	0.666667	0.7		63.2051	5.73782	4
	4.8M	0.461538	0.8	0.833333	0.9		74.8718	9.79575	4
	6.4M	0.461538	0.8	0.916667	0.9		76.9551	10.5853	4
	9.6M	0.461538	0.8	0.916667	0.9		76.9551	10.5853	4
satisfied	D-Glucose	group1	group2	group3	group4		mean (%)	SEM (%)	number
	200mM	0	0	0	0		0	0	4
	400mM	0	0.166667	0.416667	0.1		17.0833	8.8813	4
	800mM	0.153846	0.25	0.583333	0.5		37.1795	10.1456	4
	1.6M	0.230769	0.416667	0.833333	0.6		52.0192	12.8747	4
	3.2M	0.769231	0.75	0.916667	0.8		80.8974	3.7345	4
	4.8M	0.769231	1	0.916667	0.9		89.6474	4.77219	4
	6.4M	0.769231	1	0.916667	0.9		89.6474	4.77219	4
	9.6M	0.769231	1	0.916667	0.9		89.6474	4.77219	4

## Sheet: Figure1-supplement1-F
naïve	sucrose	group1	group2	group3	group4	group5	group6	group7		mean (%)	SEM (%)	number			group1	group2	group3	group4	group5	group6	group7
	6.25mM	0	0	0	0	0	0	0		0	0	7		αS:	1.39503	1.64907	1.54102	1.9842	2.015	1.61885	1.88277
	12.5mM	0	0	0	0	0	0	0		0	0	7		MAT	116.807	93.2624	113.028	121.414	141.422	125.102	94.5426
	25mM	0	0.1	0	0	0	0	0		1.42857	1.42857	7
	50mM	0.1	0.2	0.1	0	0	0.1	0.1		8.57143	2.6082	7
	100mM	0.5	0.5	0.5	0.4	0.3	0.4	0.6		45.7143	3.68856	7
	200mM	0.7	0.9	0.7	0.8	0.7	0.7	0.8		75.7143	2.97381	7
	400mM	0.9	1	1	0.9	1	1	1		97.1429	1.84428	7
	800mM	1	1	1	1	1	1	1		100	0	7
failed	sucrose	group1	group2	group3	group4	group5				mean (%)	SEM (%)	number			group1	group2	group3	group4	group5
	6.25mM	0	0	0	0	0				0	0	5		αS:	1.56032	1.25329	2.12438	1.81428	1.77942
	12.5mM	0	0	0	0	0				0	0	5		MAT	362.218	271.805	478.785	468.39	381.129
	25mM	0	0	0	0	0				0	0	5
	50mM	0	0	0	0	0				0	0	5
	100mM	0	0.1	0	0	0				2	2	5
	200mM	0.2	0.4	0	0.1	0.2				18	6.63325	5
	400mM	0.6	0.7	0.4	0.4	0.5				52	5.83095	5
	800mM	0.8	0.8	0.8	0.8	0.9				82	2	5
Satisfied-Failed	sucrose	group1	group2	group3	group4					mean (%)	SEM (%)	number			group1	group2	group3	group4
	6.25mM	0	0	0	0					0	0	4		αS:	2.89199	2.64159	3.44582	4.34266
	12.5mM	0	0	0	0					0	0	4		MAT	203.567	285.243	306.082	283.233
	25mM	0	0	0	0					0	0	4
	50mM	0	0	0	0					0	0	4
	100mM	0	0	0	0					0	0	4
	200mM	0.5	0.2	0.1	0.1					22.5	9.46485	4
	400mM	0.9	0.8	0.8	0.9					85	2.88675	4
	800mM	1	0.9	0.9	0.9					92.5	2.5	4
satisfied	sucrose	group1	group2	group3	group4	group5	group6	group7		mean (%)	SEM (%)	number			group1	group2	group3	group4	group5	group6	group7
	6.25mM	0	0	0	0	0	0	0		0	0	7		αS:	2.13134	2.16514	1.1294	1.53893	2.16505	1.6394	1.70116
	12.5mM	0	0	0	0	0	0	0		0	0	7		MAT	77.9368	119.243	165.46	176.986	167.724	133.208	118.492
	25mM	0	0	0	0	0	0	0		0	0	7
	50mM	0.2	0	0.1	0	0	0	0.1		5.71429	2.97381	7
	100mM	0.7	0.4	0.4	0.3	0.2	0.4	0.4		40	5.7735	7
	200mM	0.9	0.8	0.5	0.5	0.6	0.7	0.8		68.5714	5.94762	7
	400mM	1	1	0.8	0.9	1	0.9	0.9		92.8571	2.85714	7
	800mM	1	1	1	1	1	1	1		100	0	7
