# Supplementary material for: Sexual failure decreases sweet taste perception in male Drosophila via dopaminergic signaling
Source: eLife. 2025 Jul 23;14:RP105094. doi: 10.7554/eLife.105094 (PMC12286605; doi:10.7554/eLife.105094)
Supplement: Figure 1—source data 1. [file elife-105094-fig1-data1.xlsx]

## Sheet: Figure1-B
naive	failed	satisfied
1	0.625	1
1	0.5	1
1	0.3	1

## Sheet: Figure1-C
naïve	sucrose	group1	group2	group3	group4		mean (%)	SEM (%)	number			group1	group2	group3	group4
	6.25mM	0	0	0	0		0	0	4		αS:	0.844472	0.979059	1.81461	1.54916
	12.5mM	0	0	0	0		0	0	4		MAT	111.752	112.832	154.7	97.248
	25mM	0.25	0.181818	0	0.111111		13.5732	5.33936	4
	50mM	0.375	0.272727	0	0.222222		21.7487	7.91543	4
	100mM	0.375	0.454545	0.3	0.444444		39.3497	3.58311	4
	200mM	0.5	0.545455	0.6	0.888889		63.3586	8.75214	4
	400mM	1	1	1	1		100	0	4
	800mM	1	1	1	1		100	0	4
failed	sucrose	group1	group2	group3	group4		mean (%)	SEM (%)	number			group1	group2	group3	group4
	6.25mM	0	0	0	0		0	0	4		αS:	1.38251	1.3815	1.34026	1.87308
	12.5mM	0	0	0	0		0	0	4		MAT	343.859	376.646	164.226	351.079
	25mM	0	0	0	0		0	0	4
	50mM	0	0.0909091	0.0833333	0		4.35606	2.51972	4
	100mM	0.0833333	0.0909091	0.25	0.0833333		12.6894	4.10742	4
	200mM	0.25	0.181818	0.666667	0.166667		31.6288	11.8191	4
	400mM	0.583333	0.545455	0.75	0.583333		61.553	4.57038	4
	800mM	0.833333	0.818182	1	0.916667		89.2045	4.19954	4
satisfied	sucrose	group1	group2	group3	group4		mean (%)	SEM (%)	number			group1	group2	group3	group4
	6.25mM	0	0	0	0		0	0	4		αS:	0.765017	2.19167	1.14946	1.16011
	12.5mM	0	0	0	0		0	0	4		MAT	97.3114	135.1	137.562	64.1547
	25mM	0.2	0	0.0909091	0.272727		14.0909	6.00161	4
	50mM	0.3	0	0.272727	0.363636		23.4091	8.03209	4
	100mM	0.6	0.272727	0.272727	0.636364		44.5455	10	4
	200mM	0.7	0.818182	0.636364	0.909091		76.5909	6.07999	4
	400mM	0.8	0.818182	0.909091	1		88.1818	4.60566	4
	800mM	0.8	1	1	1		95	5	4

## Sheet: Figure1-D
naïve
	sucrose	group1	group2	group3	group4	group5	group6	group7	group8	group9	group10	group11	group12	group13	group14		mean (%)	SEM (%)	number			group1	group2	group3	group4	group5	group6	group7	group8	group9	group10	group11	group12	group13	group14
	6.25mM	0	0	0	0	0	0	0	0	0	0	0	0	0	0		0	0	14		αS:	0.844472	0.979059	1.81461	1.54916	0.891907	0.895412	1.77664	0.767556	1.36448	0.828451	1.19638	1.56717	1.38931	0.972954
	12.5mM	0	0	0	0	0	0.0909091	0	0	0.0714286	0.117647	0	0	0	0		1.99989	1.08961	14		MAT	111.752	112.832	154.7	97.248	111.821	58.4462	205.566	58.9048	139.851	76.4968	114.536	157.148	192.879	166.189
	25mM	0.25	0.181818	0	0.111111	0.153846	0.272727	0	0.444444	0.0714286	0.235294	0.1	0	0	0		13.0048	3.60992	14
	50mM	0.375	0.272727	0	0.222222	0.307692	0.545455	0	0.444444	0.142857	0.411765	0.3	0	0.0714286	0.230769		23.7454	4.70588	14
	100mM	0.375	0.454545	0.3	0.444444	0.461539	0.545455	0.157895	0.666667	0.285714	0.529412	0.3	0.333333	0.285714	0.384615		39.4595	3.53466	14
	200mM	0.5	0.545455	0.6	0.888889	0.615385	0.818182	0.473684	0.777778	0.714286	0.705882	0.8	0.583333	0.428571	0.461539		63.6642	3.96513	14
	400mM	1	1	1	1	0.846154	1	0.842105	0.777778	0.857143	0.941176	0.9	0.916667	0.857143	0.769231		90.7671	2.26188	14
	800mM	1	1	1	1	1	1	1	1	1	1	1	1	1	1		100	0	14
failed-0h
	sucrose	group1	group2	group3	group4												mean (%)	SEM (%)	number			group1	group2	group3	group4
	6.25mM	0	0	0	0												0	0	4		αS:	1.38251	1.3815	1.34026	1.87308
	12.5mM	0	0	0	0												0	0	4		MAT	343.859	376.646	164.226	351.079
	25mM	0	0	0	0												0	0	4
	50mM	0	0.0909091	0.0833333	0												4.35606	2.51972	4
	100mM	0.0833333	0.0909091	0.25	0.0833333												12.6894	4.10742	4
	200mM	0.25	0.181818	0.666667	0.166667												31.6288	11.8191	4
	400mM	0.583333	0.545455	0.75	0.583333												61.553	4.57038	4
	800mM	0.833333	0.818182	1	0.916667												89.2045	4.19954	4
failed-24h
	sucrose	group1	group2	group3	group4												mean (%)	SEM (%)	number			group1	group2	group3	group4
	6.25mM	0	0	0	0												0	0	4		αS:	1.63471	2.00137	1.42665	1.32565
	12.5mM	0	0	0	0												0	0	4		MAT	186.115	323.709	263.35	167.566
	25mM	0.0833333	0	0	0												2.08333	2.08333	4
	50mM	0.166667	0.0833333	0.0833333	0												8.33333	3.40207	4
	100mM	0.166667	0.0833333	0.166667	0.363636												19.5076	5.95211	4
	200mM	0.5	0.166667	0.333333	0.545455												38.6364	8.62661	4
	400mM	0.916667	0.666667	0.666667	0.818182												76.7045	6.13414	4
	800mM	1	0.916667	1	1												97.9167	2.08333	4
failed-48h
	sucrose	group1	group2	group3	group4												mean (%)	SEM (%)	number			group1	group2	group3	group4
	6.25mM	0	0	0	0												0	0	4		αS:	1.1074	1.75709	0.957935	1.30412
	12.5mM	0	0	0	0												0	0	4		MAT	218.938	187.307	292.22	222.284
	25mM	0	0	0	0												0	0	4
	50mM	0.181818	0	0.0909091	0.1												9.31818	3.7183	4
	100mM	0.181818	0.214286	0.0909091	0.2												17.1753	2.77548	4
	200mM	0.454545	0.5	0.454545	0.4												45.2273	2.04545	4
	400mM	0.727273	0.928571	0.636364	0.8												77.3052	6.17063	4
	800mM	0.909091	0.928571	0.727273	0.9												86.6234	4.67021	4
failed-72h
	sucrose	group1	group2	group3	group4												mean (%)	SEM (%)	number			group1	group2	group3	group4
	6.25mM	0	0	0	0												0	0	4		αS:	1.06885	1.09114	1.06759	1.13415
	12.5mM	0.0833333	0	0	0												2.08333	2.08333	4		MAT	115.312	106.928	72.2345	103.721
	25mM	0.0833333	0.0833333	0.166667	0												8.33333	3.40207	4
	50mM	0.25	0.25	0.416667	0.3												30.4167	3.93083	4
	100mM	0.416667	0.5	0.583333	0.5												50	3.40207	4
	200mM	0.666667	0.666667	0.833333	0.7												71.6667	3.96746	4
	400mM	0.916667	0.916667	0.916667	0.9												91.25	0.416667	4
	800mM	1	1	1	1												100	0	4
satisfied
	sucrose	group1	group2	group3	group4	group5	group6	group7	group8	group9	group10	group11	group12	group13	group14		mean (%)	SEM (%)	number			group1	group2	group3	group4	group5	group6	group7	group8	group9	group10	group11	group12	group13	group14
	6.25mM	0	0	0	0	0	0	0	0	0	0	0	0	0	0		0	0	14		αS:	0.765017	2.19167	1.14946	1.16011	1.04077	0.967204	1.08718	1.11505	0.890324	0.845277	0.755354	1.18341	1.44606	1.27257
	12.5mM	0	0	0	0	0.0909091	0.1	0	0.1	0	0.0769231	0.0714286	0	0	0.111111		3.93123	1.28373	14		MAT	97.3114	135.1	137.562	64.1547	70.4052	58.1364	73.0328	73.0822	116.14	128.127	113.098	149.219	101.136	101.714
	25mM	0.2	0	0.0909091	0.272727	0.0909091	0.3	0.0769231	0.1	0.166667	0.230769	0.214286	0	0	0.111111		13.245	2.67795	14
	50mM	0.3	0	0.272727	0.363636	0.454545	0.4	0.461539	0.4	0.25	0.230769	0.285714	0.1	0.181818	0.222222		28.0212	3.53012	14
	100mM	0.6	0.272727	0.272727	0.636364	0.636364	0.7	0.615385	0.6	0.5	0.384615	0.454545	0.4	0.545455	0.444444		50.4473	3.66196	14
	200mM	0.7	0.818182	0.636364	0.909091	0.727273	0.8	0.769231	0.8	0.583333	0.538462	0.642857	0.6	0.727273	0.777778		71.6417	2.80564	14
	400mM	0.8	0.818182	0.909091	1	1	1	0.923077	1	0.833333	0.923077	0.785714	0.8	1	1		91.3748	2.37549	14
	800mM	0.8	1	1	1	1	1	1	1	1	0.923077	0.928571	1	1	1		97.5118	1.52545	14

## Sheet: Figure1-E
naïve	sucrose	group1	group2	group3	group4		mean (%)	SEM (%)	number			group1	group2	group3	group4
	6.25mM	0	0	0	0		0	0	4		αS:	1.26789	1.88117	1.38104	2.015
	12.5mM	0	0	0	0		0	0	4		MAT	115.549	211.545	234.248	141.422
	25mM	0	0	0	0		0	0	4
	50mM	0.166667	0	0	0		4.16668	4.16668	4
	100mM	0.5	0.2	0.1	0.3		27.5	8.53913	4
	200mM	0.666667	0.4	0.5	0.7		56.6667	7.07107	4
	400mM	0.916667	0.9	0.7	1		87.9167	6.36014	4
	800mM	1	1	0.9	1		97.5	2.5	4
failed(mated)	sucrose	group1	group2	group3	group4		mean (%)	SEM (%)	number			group1	group2	group3	group4
	6.25mM	0	0	0	0		0	0	4		αS:	0.968048	1.33041	2.84854	3.59543
	12.5mM	0	0	0	0		0	0	4		MAT	461.623	486.721	358.591	305.958
	25mM	0	0	0	0		0	0	4
	50mM	0	0	0	0		0	0	4
	100mM	0.1	0	0	0		2.5	2.5	4
	200mM	0.3	0	0.1	0.1		12.5	6.29153	4
	400mM	0.4	0.6	0.6	0.8		60	8.16497	4
	800mM	0.7	0.6	1	1		82.5	10.3078	4
failed(Decapitated virgin)	sucrose	group1	group2	group3	group4		mean (%)	SEM (%)	number			group1	group2	group3	group4
	6.25mM	0	0	0	0		0	0	4		αS:	1.8584	1.89795	3.50486	1.70454
	12.5mM	0	0	0	0		0	0	4		MAT	528.57	573.045	373.214	526.33
	25mM	0	0	0	0		0	0	4
	50mM	0	0	0	0		0	0	4
	100mM	0	0	0	0		0	0	4
	200mM	0	0	0	0		0	0	4
	400mM	0.363636	0.3	0.6	0.4		41.5909	6.47495	4
	800mM	0.727273	0.7	0.9	0.7		75.6818	4.81582	4
satisfied	sucrose	group1	group2	group3	group4		mean (%)	SEM (%)	number			group1	group2	group3	group4
	6.25mM	0	0	0	0		0	0	4		αS:	1.43282	1.50199	1.41737	1.80779
	12.5mM	0	0	0	0		0	0	4		MAT	147.874	212.685	195.844	210.308
	25mM	0	0	0	0		0	0	4
	50mM	0.090909	0.1	0.1	0		7.27272	2.43369	4
	100mM	0.272727	0.1	0.2	0.1		16.8182	4.2071	4
	200mM	0.727273	0.5	0.5	0.5		55.6818	5.68183	4
	400mM	0.818182	0.8	0.8	0.8		80.4545	0.45455	4
	800mM	0.909091	0.9	1	1		95.2273	2.76178	4

## Sheet: Figure1-F
naïve	sucrose	group1	group2	group3	group4	group5		mean (%)	SEM (%)	number			group1	group2	group3	group4	group5
	6.25mM	0	0	0	0	0		0	0	5		αS:	1.26777	2.2909	1.7285	1.80798	3.59544
	12.5mM	0	0	0	0	0		0	0	5		MAT	168.131	203.031	131.493	144.964	261.474
	25mM	0.166667	0	0	0	0		3.33334	3.33334	5
	50mM	0.166667	0	0.083333	0	0		5	3.33334	5
	100mM	0.25	0	0.333333	0.3	0		17.6667	7.33333	5
	200mM	0.5	0.545455	0.75	0.7	0.2		53.9091	9.66762	5
	400mM	0.916667	0.818182	0.916667	0.9	0.9		89.0303	1.84114	5
	800mM	1	1	1	1	1		100	0	5
failed	sucrose	group1	group2	group3	group4	group5		mean (%)	SEM (%)	number			group1	group2	group3	group4	group5
	6.25mM	0	0	0	0	0		0	0	5		αS:	2.17261	1.21222	1.02182	2.7982	2.29129
	12.5mM	0	0	0	0	0		0	0	5		MAT	345.865	391.97	542.832	566.289	616.741
	25mM	0	0	0	0	0		0	0	5
	50mM	0	0	0	0	0		0	0	5
	100mM	0	0	0	0	0		0	0	5
	200mM	0.153846	0.272727	0.272727	0	0		13.986	6.10838	5
	400mM	0.615385	0.545455	0.363636	0.2	0.2		38.4895	8.59446	5
	800mM	0.923077	0.727273	0.636364	0.8	0.7		75.7343	4.90488	5
failed-re-copulated	sucrose	group1	group2	group3	group4	group5		mean (%)	SEM (%)	number			group1	group2	group3	group4	group5
	6.25mM	0	0	0	0	0		0	0	5		αS:	1.68518	1.94649	1.21222	1.4665	1.77942
	12.5mM	0	0	0	0	0		0	0	5		MAT	267.111	261.345	391.97	217.822	381.129
	25mM	0.090909	0	0	0	0		1.81818	1.81818	5
	50mM	0.090909	0	0	0.1	0		3.81818	2.34256	5
	100mM	0.090909	0	0	0.2	0		5.81818	3.95846	5
	200mM	0.272727	0.363636	0.272727	0.4	0.2		30.1818	3.57216	5
	400mM	0.818182	0.727273	0.545455	0.8	0.5		67.8182	6.56562	5
	800mM	0.818182	1	0.727273	1	0.9		88.9091	5.28837	5
