# Supplementary material for: Sexual failure decreases sweet taste perception in male Drosophila via dopaminergic signaling
Source: eLife. 2025 Jul 23;14:RP105094. doi: 10.7554/eLife.105094 (PMC12286605; doi:10.7554/eLife.105094)
Supplement: Figure 2—figure supplement 1—source data 1. [file elife-105094-fig2-figsupp1-data1.xlsx]

## Sheet: Figure2-supplement1-A
Wild type
naïve	sucrose	group1	group2	group3	group4		mean (%)	SEM (%)	number			group1	group2	group3	group4
	6.25mM	0	0	0	0		0	0	4		αS:	1.55306	1.9842	2.19775	2.015
	12.5mM	0	0	0	0		0	0	4		MAT	200.077	121.414	132.32	141.422
	25mM	0	0	0	0		0	0	4
	50mM	0	0	0	0		0	0	4
	100mM	0.2	0.4	0.3	0.3		30	4.08248	4
	200mM	0.5	0.8	0.8	0.7		70	7.07107	4
	400mM	0.8	0.9	0.9	1		90	4.08248	4
	800mM	1	1	1	1		100	0	4
failed	sucrose	group1	group2	group3	group4		mean (%)	SEM (%)	number			group1	group2	group3	group4
	6.25mM	0	0	0	0		0	0	4		αS:	9.65611	2.3332	1.77942	3.50342
	12.5mM	0	0	0	0		0	0	4		MAT	400	441.882	381.128	428.716
	25mM	0	0	0	0		0	0	4
	50mM	0	0	0	0		0	0	4
	100mM	0	0	0	0		0	0	4
	200mM	0	0.1	0.2	0.1		10	4.08248	4
	400mM	0.5	0.4	0.5	0.4		45	2.88675	4
	800mM	1	0.9	0.9	1		95	2.88675	4
satisfied	sucrose	group1	group2	group3	group4		mean (%)	SEM (%)	number			group1	group2	group3	group4
	6.25mM	0	0	0	0		0	0	4		αS:	1.8148	1.80799	2.35545	2.84983
	12.5mM	0	0	0	0		0	0	4		MAT	129.285	144.964	110.401	111.545
	25mM	0	0	0	0		0	0	4
	50mM	0	0	0.1	0		2.5	2.5	4
	100mM	0.4	0.3	0.4	0.4		37.5	2.5	4
	200mM	0.7	0.7	0.9	0.9		80	5.7735	4
	400mM	1	0.9	1	1		97.5	2.5	4
	800mM	1	1	1	1		100	0	4
Th mutant
naïve	sucrose	group1	group2	group3	group4		mean (%)	SEM (%)	number			group1	group2	group3	group4
	6.25mM	0	0	0	0		0	0	4		αS:	3.59286	2.74636	2.6195	2.6195
	12.5mM	0	0	0	0		0	0	4		MAT	523.015	734.764	718.405	718.405
	25mM	0	0	0	0		0	0	4
	50mM	0	0	0	0		0	0	4
	100mM	0	0	0	0		0	0	4
	200mM	0	0	0	0		0	0	4
	400mM	0.2	0.083333	0.1	0.1		12.0833	2.66797	4
	800mM	0.9	0.583333	0.6	0.6		67.0833	7.64899	4
failed	sucrose	group1	group2	group3	group4		mean (%)	SEM (%)	number			group1	group2	group3	group4
	6.25mM	0	0	0	0		0	0	4		αS:	9.92231	9.94829	2.6195	9.99287
	12.5mM	0	0	0	0		0	0	4		MAT	424.391	781.463	718.405	777.814
	25mM	0	0	0	0		0	0	4
	50mM	0	0	0	0		0	0	4
	100mM	0	0	0	0		0	0	4
	200mM	0	0	0	0		0	0	4
	400mM	0.3	0	0.1	0		10	7.07107	4
	800mM	1	0.583333	0.6	0.6		69.5833	10.1465	4
satisfied	sucrose	group1	group2	group3	group4		mean (%)	SEM (%)	number			group1	group2	group3	group4
	6.25mM	0	0	0	0		0	0	4		αS:	9.99933	2.72944	2.29129	2.7982
	12.5mM	0	0	0	0		0	0	4		MAT	440.346	604.534	616.741	566.289
	25mM	0	0	0	0		0	0	4
	50mM	0	0	0	0		0	0	4
	100mM	0	0	0	0		0	0	4
	200mM	0	0	0	0		0	0	4
	400mM	0.2	0.166667	0.2	0.2		19.1667	0.833325	4
	800mM	1	0.75	0.7	0.8		81.25	6.57489	4

## Sheet: Figure2-supplement1-B
Vehicle	sucrose	group1	group2	group3	group4		mean (%)	SEM (%)	number			group1	group2	group3	group4
	6.25mM	0	0	0	0		0	0	4		αS:	2.35516	2.11777	3.1102	1.55306
	12.5mM	0	0	0	0		0	0	4		MAT	220.803	185.15	165.001	200.077
	25mM	0	0	0	0		0	0	4
	50mM	0	0	0	0		0	0	4
	100mM	0.1	0.2	0.1	0.2		15	2.88675	4
	200mM	0.4	0.5	0.7	0.5		52.5	6.29153	4
	400mM	0.9	1	1	0.8		92.5	4.78714	4
	800mM	1	1	1	1		100	0	4
0.1ng/ul	sucrose	group1	group2	group3	group4		mean (%)	SEM (%)	number			group1	group2	group3	group4
	6.25mM	0	0	0	0		0	0	4		αS:	9.64188	2.35537	1.55306	1.53448
	12.5mM	0	0	0	0		0	0	4		MAT	200	181.158	200.077	226.263
	25mM	0	0	0	0		0	0	4
	50mM	0	0	0	0		0	0	4
	100mM	0	0.1	0.2	0.1		10	4.08248	4
	200mM	0.5	0.6	0.5	0.5		52.5	2.5	4
	400mM	1	0.9	0.8	0.7		85	6.45497	4
	800mM	1	1	1	1		100	0	4
1ng/ul	sucrose	group1	group2	group3	group4		mean (%)	SEM (%)	number			group1	group2	group3	group4
	6.25mM	0	0	0	0		0	0	4		αS:	2.3893	2.16513	1.47521	1.18926
	12.5mM	0	0	0	0		0	0	4		MAT	130.412	119.243	108.877	67.1136
	25mM	0	0	0.1	0.2		7.5	4.78714	4
	50mM	0	0	0.2	0.4		15	9.57427	4
	100mM	0.3	0.4	0.4	0.6		42.5	6.29153	4
	200mM	0.8	0.8	0.8	0.9		82.5	2.5	4
	400mM	1	1	1	1		100	0	4
	800mM	1	1	1	1		100	0	4
10ng/ul	sucrose	group1	group2	group3	group4		mean (%)	SEM (%)	number			group1	group2	group3	group4
	6.25mM	0	0	0	0		0	0	4		αS:	1.60478	1.80829	1.79368	1.38929
	12.5mM	0	0	0	0		0	0	4		MAT	89.9778	72.4801	61.9305	67.8824
	25mM	0	0	0.2	0.2		10	5.7735	4
	50mM	0.2	0.3	0.3	0.3		27.5	2.5	4
	100mM	0.6	0.7	0.8	0.7		70	4.08248	4
	200mM	0.8	0.9	1	0.9		90	4.08248	4
	400mM	1	1	1	1		100	0	4
	800mM	1	1	1	1		100	0	4

## Sheet: Figure2-supplement1-C
naïve	sucrose	group1	group2	group3	group4		mean (%)	SEM (%)	number			group1	group2	group3	group4
	6.25mM	0	0	0	0		0	0	4		αS:	1.80806	1.64674	3.58103	2.05506
	12.5mM	0	0	0	0		0	0	4		MAT	137.97	186.533	188.92	156.483
	25mM	0	0	0	0		0	0	4
	50mM	0.1	0.1	0	0		5	2.88675	4
	100mM	0.3	0.2	0	0.2		17.5	6.29153	4
	200mM	0.7	0.5	0.583333	0.7		62.0833	4.87696	4
	400mM	1	0.9	0.916667	0.9		92.9167	2.39357	4
	800mM	1	1	1	0.9		97.5	2.5	4
failed	sucrose	group1	group2	group3	group4		mean (%)	SEM (%)	number			group1	group2	group3	group4
	6.25mM	0	0	0	0		0	0	4		αS:	1.9324	2.58598	1.99708	2.34541
	12.5mM	0	0	0	0		0	0	4		MAT	424.101	350.822	452.388	386.096
	25mM	0	0	0	0		0	0	4
	50mM	0	0	0	0		0	0	4
	100mM	0	0	0	0		0	0	4
	200mM	0.0625	0.0909091	0.0833333	0		5.91856	2.06224	4
	400mM	0.5	0.636364	0.416667	0.6		53.8258	4.97367	4
	800mM	0.8125	0.909091	0.833333	0.8		83.8731	2.44401	4
satisfied	sucrose	group1	group2	group3	group4		mean (%)	SEM (%)	number			group1	group2	group3	group4
	6.25mM	0	0	0	0		0	0	4		αS:	1.37682	1.37146	2.5759	1.37546
	12.5mM	0	0	0	0		0	0	4		MAT	274.339	284.124	192.623	297.64
	25mM	0	0	0	0		0	0	4
	50mM	0	0	0	0		0	0	4
	100mM	0.066667	0	0	0.181818		6.21213	4.28817	4
	200mM	0.4	0.5	0.583333	0.272727		43.9015	6.69084	4
	400mM	0.666667	0.5	0.833333	0.636364		65.9091	6.84618	4
	800mM	0.866667	1	1	0.909091		94.394	3.3505	4

## Sheet: Figure2-supplement1-D
naïve	sucrose	group1	group2	group3	group4		mean (%)	SEM (%)	number			group1	group2	group3	group4
	6.25mM	0	0	0	0		0	0	4		αS:	3.08378	1.26783	1.64303	2.015
	12.5mM	0	0.090909	0	0		2.27272	2.27272	4		MAT	128.403	104.759	165.497	141.422
	25mM	0	0.090909	0	0		2.27272	2.27272	4
	50mM	0	0.181818	0	0		4.54545	4.54545	4
	100mM	0.25	0.454545	0.333333	0.3		33.447	4.35341	4
	200mM	0.875	0.818182	0.5	0.7		72.3296	8.2876	4
	400mM	1	0.909091	1	1		97.7273	2.27273	4
	800mM	1	0.909091	1	1		97.7273	2.27273	4
failed	sucrose	group1	group2	group3	group4		mean (%)	SEM (%)	number			group1	group2	group3	group4
	6.25mM	0	0	0	0		0	0	4		αS:	1.88767	1.48599	1.48241	1.86889
	12.5mM	0	0	0	0		0	0	4		MAT	309.593	256.062	301.825	344.019
	25mM	0	0	0	0		0	0	4
	50mM	0	0	0	0		0	0	4
	100mM	0	0	0.111111	0		2.77778	2.77778	4
	200mM	0.25	0.454545	0.333333	0.2		30.947	5.56301	4
	400mM	0.666667	0.727273	0.555556	0.6		63.7374	3.76728	4
	800mM	0.916667	0.818182	1	0.9		90.8712	3.72697	4
satisfied	sucrose	group1	group2	group3	group4		mean (%)	SEM (%)	number			group1	group2	group3	group4
	6.25mM	0	0	0	0		0	0	4		αS:	1.23737	0.818615	1.71983	1.09955
	12.5mM	0	0.1	0	0		2.5	2.5	4		MAT	134.474	97.501	199.674	130.735
	25mM	0.076923	0.2	0	0.1		9.42308	4.12305	4
	50mM	0.153846	0.3	0	0.2		16.3461	6.24433	4
	100mM	0.384615	0.5	0.222222	0.4		37.6709	5.74977	4
	200mM	0.615385	0.7	0.444444	0.6		58.9957	5.32533	4
	400mM	0.923077	0.8	0.888889	0.9		87.7991	2.69544	4
	800mM	1	1	1	1		100	0	4

## Sheet: Figure2-supplement1-E
TH-GAL4/UAS-dTRPA1
naïve	sucrose	group1	group2	group3	group4						mean (%)	SEM (%)	number			group1	group2	group3	group4
	6.25mM	0	0	0	0						0	0	4		αS:	1.40501	2.7982	1.63153	2.12438
	12.5mM	0	0	0	0						0	0	4		MAT	596.524	566.289	562.676	478.785
	25mM	0	0	0	0						0	0	4
	50mM	0	0	0	0						0	0	4
	100mM	0	0	0	0						0	0	4
	200mM	0	0	0.1	0						2.5	2.5	4
	400mM	0.4	0.2	0.3	0.4						32.5	4.78714	4
	800mM	0.6	0.8	0.7	0.8						72.5	4.78714	4
TH-GAL4/UAS-dTRPA1
failed	sucrose	group1	group2	group3	group4						mean (%)	SEM (%)	number			group1	group2	group3	group4
	6.25mM	0	0	0	0						0	0	4		αS:	1.29374	1.24647	1.49943	2.23289
	12.5mM	0	0	0	0						0	0	4		MAT	1600	742.092	1177.59	799.478
	25mM	0	0	0	0						0	0	4
	50mM	0	0	0	0						0	0	4
	100mM	0	0	0	0						0	0	4
	200mM	0	0	0	0						0	0	4
	400mM	0.1	0.333333	0.1	0.1						15.8333	5.83333	4
	800mM	0.2	0.5	0.3	0.5						37.5	7.5	4
TH-GAL4/UAS-dTRPA1
satisfied	sucrose	group1	group2	group3	group4						mean (%)	SEM (%)	number			group1	group2	group3	group4
	6.25mM	0	0	0	0						0	0	4		αS:	1.93015	0.623904	1.63153	1.32774
	12.5mM	0	0	0	0						0	0	4		MAT	511.901	833.47	562.676	638.642
	25mM	0	0	0	0						0	0	4
	50mM	0	0	0	0						0	0	4
	100mM	0	0	0	0						0	0	4
	200mM	0	0.4	0.1	0.1						15	8.66025	4
	400mM	0.375	0.4	0.3	0.3						34.375	2.57694	4
	800mM	0.75	0.4	0.7	0.6						61.25	7.73924	4
TH-GAL4/+
naïve	sucrose	group1	group2	group3	group4	group5	group6	group7	group8		mean (%)	SEM (%)	number			group1	group2	group3	group4	group5	group6	group7	group8
	6.25mM	0	0	0	0	0	0	0	0		0	0	8		αS:	3.58771	2.00813	2.78256	1.63966	0.944413	0.706913	1.01052	0.928175
	12.5mM	0	0	0	0	0	0	0	0		0	0	8		MAT	565.762	798.574	255.486	898.28	789.272	669.541	700.693	567.436
	25mM	0	0	0	0	0	0	0	0		0	0	8
	50mM	0	0	0	0	0	0	0	0		0	0	8
	100mM	0	0	0.125	0	0.1	0.1	0	0.1		5.3125	2.02867	8
	200mM	0	0	0.25	0	0.1	0.3	0.1	0.2		11.875	4.21916	8
	400mM	0.142857	0.125	0.875	0.142857	0.3	0.4	0.4	0.4		34.8214	8.68127	8
	800mM	0.857143	0.5	1	0.428571	0.5	0.5	0.5	0.6		61.0714	7.25298	8
TH-GAL4/+
failed	sucrose	group1	group2	group3	group4	group5	group6	group7	group8		mean (%)	SEM (%)	number			group1	group2	group3	group4	group5	group6	group7	group8
	6.25mM	0	0	0	0	0	0	0	0		0	0	8		αS:	9.47735	9.47735	1.64097	9.97597	9.86016	1.29374	1.90906	1.49943
	12.5mM	0	0	0	0	0	0	0	0		0	0	8		MAT	922.355	922.355	728.564	828.904	881.888	1600	1600	1177.59
	25mM	0	0	0	0	0	0	0	0		0	0	8
	50mM	0	0	0	0	0	0	0	0		0	0	8
	100mM	0	0	0	0	0	0	0	0		0	0	8
	200mM	0	0	0.142857	0	0	0	0	0		1.78571	1.78571	8
	400mM	0	0	0.142857	0	0	0.1	0.1	0.1		5.53571	2.15028	8
	800mM	0.125	0.125	0.571429	0.375	0.2	0.2	0.1	0.3		24.9554	5.67246	8
TH-GAL4/+
satisfied	sucrose	group1	group2	group3	group4	group5	group6	group7	group8		mean (%)	SEM (%)	number			group1	group2	group3	group4	group5	group6	group7	group8
	6.25mM	0	0	0	0	0	0	0	0		0	0	8		αS:	9.8673	1.16062	1.07143	0.802165	1.24284	0.722469	0.944437	0.931147
	12.5mM	0	0	0	0	0	0	0	0		0	0	8		MAT	853.187	889.062	588.222	330.509	443.399	615.117	479.715	501.964
	25mM	0	0	0	0	0	0	0	0		0	0	8
	50mM	0	0	0	0	0	0	0	0		0	0	8
	100mM	0	0	0	0.2	0	0.2	0	0.1		6.25	3.23899	8
	200mM	0	0	0.142857	0.5	0.2	0.3	0.3	0.2		20.5357	5.87117	8
	400mM	0	0.285714	0.428571	0.5	0.5	0.3	0.5	0.5		37.6786	6.26165	8
	800mM	0.285714	0.428571	0.571429	0.7	0.7	0.6	0.6	0.6		56.0714	4.93951	8
+/UAS-dTRPA1
naïve	sucrose	group1	group2	group3	group4						mean (%)	SEM (%)	number			group1	group2	group3	group4
	6.25mM	0	0	0	0						0	0	4		αS:	1.25426	1.1077	1.63153	1.05095
	12.5mM	0	0	0	0						0	0	4		MAT	682.505	418.535	562.676	568.071
	25mM	0	0	0	0						0	0	4
	50mM	0	0	0	0						0	0	4
	100mM	0	0	0	0						0	0	4
	200mM	0.2	0.3	0.1	0.2						20	4.08248	4
	400mM	0.2	0.5	0.3	0.4						35	6.45497	4
	800mM	0.6	0.7	0.7	0.6						65	2.88675	4
+/UAS-dTRPA1
failed	sucrose	group1	group2	group3	group4						mean (%)	SEM (%)	number			group1	group2	group3	group4
	6.25mM	0	0	0	0						0	0	4		αS:	1.04528	1.29374	9.25331	1.90906
	12.5mM	0	0	0	0						0	0	4		MAT	1600	1600	943.128	1600
	25mM	0	0	0	0						0	0	4
	50mM	0	0	0	0						0	0	4
	100mM	0	0	0	0						0	0	4
	200mM	0	0	0	0						0	0	4
	400mM	0.2	0.1	0	0.1						10	4.08248	4
	800mM	0.2	0.2	0.1	0.1						15	2.88675	4
+/UAS-dTRPA1
satisfied	sucrose	group1	group2	group3	group4						mean (%)	SEM (%)	number			group1	group2	group3	group4
	6.25mM	0	0	0	0						0	0	4		αS:	1.27752	1.17613	1.05095	1.21501
	12.5mM	0	0	0	0						0	0	4		MAT	327.439	527.053	568.071	584.784
	25mM	0	0	0	0						0	0	4
	50mM	0	0	0	0						0	0	4
	100mM	0	0	0	0						0	0	4
	200mM	0.3	0.1	0.2	0.1						17.5	4.78714	4
	400mM	0.7	0.5	0.4	0.4						50	7.07107	4
	800mM	0.7	0.6	0.6	0.6						62.5	2.5	4

## Sheet: Figure2-supplement1-F
TH-GAL4/UAS-Shits
naïve	sucrose	group1	group2	group3	group4	group5	group6				mean (%)	SEM (%)	number			group1	group2	group3	group4	group5	group6
	6.25mM	0	0	0	0	0	0				0	0	6		αS:	0.642111	0.874989	1.16914	1.09013	2.7387	1.25426
	12.5mM	0	0	0	0	0	0				0	0	6		MAT	610.116	468.939	705.535	765.212	385.966	682.505
	25mM	0	0	0	0	0	0				0	0	6
	50mM	0	0	0	0	0	0				0	0	6
	100mM	0.3	0	0	0	0	0				5	5	6
	200mM	0.3	0.333333	0	0.1	0	0.2				15.5555	5.9421	6
	400mM	0.3	0.555556	0.4	0.3	0.571429	0.2				38.7831	6.12908	6
	800mM	0.6	0.555556	0.5	0.5	0.857143	0.6				60.2116	5.41821	6
TH-GAL4/UAS-Shits
failed	sucrose	group1	group2	group3	group4	group5	group6				mean (%)	SEM (%)	number			group1	group2	group3	group4	group5	group6
	6.25mM	0	0	0	0	0	0				0	0	6		αS:	2.13329	9.60277	9.86016	1.5325	1.16062	1.34577
	12.5mM	0	0	0	0	0	0				0	0	6		MAT	727.248	841.044	881.888	1088.87	889.062	873.413
	25mM	0	0	0	0	0	0				0	0	6
	50mM	0	0	0	0	0	0				0	0	6
	100mM	0	0	0	0	0	0				0	0	6
	200mM	0	0	0	0	0	0				0	0	6
	400mM	0.142857	0	0	0.111111	0.285714	0.222222				12.6984	4.7265	6
	800mM	0.571429	0.333333	0.2	0.333333	0.428571	0.444444				38.5185	5.15595	6
TH-GAL4/UAS-Shits
satisfied	sucrose	group1	group2	group3	group4	group5	group6				mean (%)	SEM (%)	number			group1	group2	group3	group4	group5	group6
	6.25mM	0	0	0	0	0	0				0	0	6		αS:	0.941242	1.42487	2.13329	0.848256	1.66285	1.03117
	12.5mM	0	0	0	0	0	0				0	0	6		MAT	613.44	463.392	727.248	800	718.761	550.697
	25mM	0	0	0	0	0	0				0	0	6
	50mM	0	0	0	0	0	0				0	0	6
	100mM	0	0	0	0	0	0				0	0	6
	200mM	0.3	0.1	0	0.125	0	0.25				12.9167	5.0997	6
	400mM	0.3	0.5	0.142857	0.25	0.222222	0.375				29.8346	5.12679	6
	800mM	0.6	0.7	0.571429	0.375	0.555556	0.625				57.1164	4.43669	6
TH-GAL4/+
naïve	sucrose	group1	group2	group3	group4	group5	group6	group7	group8		mean (%)	SEM (%)	number			group1	group2	group3	group4	group5	group6	group7	group8
	6.25mM	0	0	0	0	0	0	0	0		0	0	8		αS:	3.58771	2.00813	2.78256	1.63966	0.944413	0.706913	1.01052	0.928175
	12.5mM	0	0	0	0	0	0	0	0		0	0	8		MAT	565.762	798.574	255.486	898.28	789.272	669.541	700.693	567.436
	25mM	0	0	0	0	0	0	0	0		0	0	8
	50mM	0	0	0	0	0	0	0	0		0	0	8
	100mM	0	0	0.125	0	0.1	0.1	0	0.1		5.3125	2.02867	8
	200mM	0	0	0.25	0	0.1	0.3	0.1	0.2		11.875	4.21916	8
	400mM	0.142857	0.125	0.875	0.142857	0.3	0.4	0.4	0.4		34.8214	8.68127	8
	800mM	0.857143	0.5	1	0.428571	0.5	0.5	0.5	0.6		61.0714	7.25298	8
TH-GAL4/+
failed	sucrose	group1	group2	group3	group4	group5	group6	group7	group8		mean (%)	SEM (%)	number			group1	group2	group3	group4	group5	group6	group7	group8
	6.25mM	0	0	0	0	0	0	0	0		0	0	8		αS:	9.47735	9.47735	1.64097	9.97597	9.86016	1.29374	1.90906	1.49943
	12.5mM	0	0	0	0	0	0	0	0		0	0	8		MAT	922.355	922.355	728.564	828.904	881.888	1600	1600	1177.59
	25mM	0	0	0	0	0	0	0	0		0	0	8
	50mM	0	0	0	0	0	0	0	0		0	0	8
	100mM	0	0	0	0	0	0	0	0		0	0	8
	200mM	0	0	0.142857	0	0	0	0	0		1.78571	1.78571	8
	400mM	0	0	0.142857	0	0	0.1	0.1	0.1		5.53571	2.15028	8
	800mM	0.125	0.125	0.571429	0.375	0.2	0.2	0.1	0.3		24.9554	5.67246	8
TH-GAL4/+
satisfied	sucrose	group1	group2	group3	group4	group5	group6	group7	group8		mean (%)	SEM (%)	number			group1	group2	group3	group4	group5	group6	group7	group8
	6.25mM	0	0	0	0	0	0	0	0		0	0	8		αS:	9.8673	1.16062	1.07143	0.802165	1.24284	0.722469	0.944437	0.931147
	12.5mM	0	0	0	0	0	0	0	0		0	0	8		MAT	853.187	889.062	588.222	330.509	443.399	615.117	479.715	501.964
	25mM	0	0	0	0	0	0	0	0		0	0	8
	50mM	0	0	0	0	0	0	0	0		0	0	8
	100mM	0	0	0	0.2	0	0.2	0	0.1		6.25	3.23899	8
	200mM	0	0	0.142857	0.5	0.2	0.3	0.3	0.2		20.5357	5.87117	8
	400mM	0	0.285714	0.428571	0.5	0.5	0.3	0.5	0.5		37.6786	6.26165	8
	800mM	0.285714	0.428571	0.571429	0.7	0.7	0.6	0.6	0.6		56.0714	4.93951	8
+/UAS-Shits
naïve	sucrose	group1	group2	group3	group4						mean (%)	SEM (%)	number			group1	group2	group3	group4
	6.25mM	0	0	0	0						0	0	4		αS:	2.19635	2.88744	1.80183	1.96568
	12.5mM	0	0	0	0						0	0	4		MAT	264.662	407.184	276.022	277.564
	25mM	0	0	0	0						0	0	4
	50mM	0	0	0	0						0	0	4
	100mM	0	0	0.1	0.2						7.5	4.78714	4
	200mM	0.3	0	0.3	0.2						20	7.07107	4
	400mM	0.8	0.5	0.7	0.8						70	7.07107	4
	800mM	0.9	0.9	1	0.9						92.5	2.5	4
+/UAS-Shits
failed	sucrose	group1	group2	group3	group4						mean (%)	SEM (%)	number			group1	group2	group3	group4
	6.25mM	0	0	0	0						0	0	4		αS:	1.58012	1.86485	1.30154	1.70451
	12.5mM	0	0	0	0						0	0	4		MAT	789.691	928.574	757.648	526.329
	25mM	0	0	0	0						0	0	4
	50mM	0	0	0	0						0	0	4
	100mM	0	0	0	0						0	0	4
	200mM	0	0	0	0						0	0	4
	400mM	0.2	0.1	0.3	0.4						25	6.45497	4
	800mM	0.5	0.4	0.5	0.7						52.5	6.29153	4
+/UAS-Shits
satisfied	sucrose	group1	group2	group3	group4						mean (%)	SEM (%)	number			group1	group2	group3	group4
	6.25mM	0	0	0	0						0	0	4		αS:	1.09149	1.31918	1.23067	2.34093
	12.5mM	0	0	0	0						0	0	4		MAT	324.274	383.245	222.568	414.596
	25mM	0	0	0	0						0	0	4
	50mM	0	0	0	0						0	0	4
	100mM	0	0.1	0.2	0						7.5	4.78714	4
	200mM	0.5	0.3	0.5	0.2						37.5	7.5	4
	400mM	0.5	0.4	0.7	0.4						50	7.07107	4
	800mM	0.8	0.9	0.9	1						90	4.08248	4
