# Supplementary material for: Sexual failure decreases sweet taste perception in male Drosophila via dopaminergic signaling
Source: eLife. 2025 Jul 23;14:RP105094. doi: 10.7554/eLife.105094 (PMC12286605; doi:10.7554/eLife.105094)
Supplement: Figure 2—source data 1. [file elife-105094-fig2-data1.xlsx]

## Sheet: Figure2-A
vehicle
naïve	sucrose	group1	group2	group3	group4		mean (%)	SEM (%)	number			group1	group2	group3	group4
	6.25mM	0	0	0	0		0	0	4		αS:	0.844472	0.979059	1.81461	1.54916
	12.5mM	0	0	0	0		0	0	4		MAT	111.752	112.832	154.7	97.248
	25mM	0.25	0.181818	0	0.111111		13.5732	5.33936	4
	50mM	0.375	0.272727	0	0.222222		21.7487	7.91543	4
	100mM	0.375	0.454545	0.3	0.444444		39.3497	3.58311	4
	200mM	0.5	0.545455	0.6	0.888889		63.3586	8.75214	4
	400mM	1	1	1	1		100	0	4
	800mM	1	1	1	1		100	0	4
vehicle
failed	sucrose	group1	group2	group3	group4		mean (%)	SEM (%)	number			group1	group2	group3	group4
	6.25mM	0	0	0	0		0	0	4		αS:	1.38251	1.3815	1.34026	1.87308
	12.5mM	0	0	0	0		0	0	4		MAT	343.859	376.646	164.226	351.079
	25mM	0	0	0	0		0	0	4
	50mM	0	0.0909091	0.0833333	0		4.35606	2.51972	4
	100mM	0.0833333	0.0909091	0.25	0.0833333		12.6894	4.10742	4
	200mM	0.25	0.181818	0.666667	0.166667		31.6288	11.8191	4
	400mM	0.583333	0.545455	0.75	0.583333		61.553	4.57038	4
	800mM	0.833333	0.818182	1	0.916667		89.2045	4.19954	4
vehicle
satisfied	sucrose	group1	group2	group3	group4		mean (%)	SEM (%)	number			group1	group2	group3	group4
	6.25mM	0	0	0	0		0	0	4		αS:	0.765017	2.19167	1.14946	1.16011
	12.5mM	0	0	0	0		0	0	4		MAT	97.3114	135.1	137.561	64.1547
	25mM	0.2	0	0.0909091	0.272727		14.0909	6.00161	4
	50mM	0.3	0	0.272727	0.363636		23.4091	8.03209	4
	100mM	0.6	0.272727	0.272727	0.636364		44.5455	10	4
	200mM	0.7	0.818182	0.636364	0.909091		76.5909	6.07999	4
	400mM	0.8	0.818182	0.909091	1		88.1818	4.60566	4
	800mM	0.8	1	1	1		95	5	4
3IY
naïve	sucrose	group1	group2	group3	group4		mean (%)	SEM (%)	number			group1	group2	group3	group4
	6.25mM	0	0	0	0		0	0	4		αS:	1.53261	1.2524	1.32914	1.49545
	12.5mM	0	0	0	0		0	0	4		MAT	215.604	232.225	257.742	456.376
	25mM	0	0.066667	0	0		1.66668	1.66668	4
	50mM	0.066667	0.066667	0	0		3.33335	1.92451	4
	100mM	0.133333	0.2	0.066667	0.133333		13.3333	2.72165	4
	200mM	0.466667	0.4	0.466667	0.133333		36.6667	7.93494	4
	400mM	0.8	0.733333	0.666667	0.4		65	8.76652	4
	800mM	0.933333	0.933333	0.866667	0.8		88.3333	3.19141	4
3IY
failed	sucrose	group1	group2	group3	group4		mean (%)	SEM (%)	number			group1	group2	group3	group4
	6.25mM	0	0	0	0		0	0	4		αS:	1.06849	1.76529	1.52091	1.70345
	12.5mM	0.076923	0	0	0		1.92308	1.92308	4		MAT	251.829	348.757	406.521	603.209
	25mM	0.076923	0	0	0		1.92308	1.92308	4
	50mM	0.076923	0	0	0		1.92308	1.92308	4
	100mM	0.153846	0	0	0		3.84615	3.84615	4
	200mM	0.384615	0.2	0.153846	0.066667		20.1282	6.70721	4
	400mM	0.769231	0.6	0.538462	0.266667		54.359	10.4406	4
	800mM	0.769231	0.866667	0.769231	0.666667		76.7949	4.08315	4
3IY
satisfied	sucrose	group1	group2	group3	group4		mean (%)	SEM (%)	number			group1	group2	group3	group4
	6.25mM	0	0	0	0		0	0	4		αS:	1.61727	1.73478	1.42394	1.21943
	12.5mM	0	0	0	0		0	0	4		MAT	209.012	367.83	307.192	527.409
	25mM	0	0	0	0		0	0	4
	50mM	0.066667	0	0	0		1.66668	1.66668	4
	100mM	0.133333	0	0	0		3.33333	3.33333	4
	200mM	0.466667	0.166667	0.333333	0.142857		27.7381	7.60012	4
	400mM	0.866667	0.583333	0.666667	0.428571		63.6309	9.12633	4
	800mM	0.866667	0.833333	0.8	0.642857		78.5714	4.95254	4

## Sheet: Figure2-B
vehicle
naïve	sucrose	group1	group2	group3	group4		mean (%)	SEM (%)	number			group1	group2	group3	group4
	6.25mM	0	0	0	0		0	0	4		αS:	1.88214	1.94021	1.59874	1.4705
	12.5mM	0	0	0	0		0	0	4		MAT	232.808	181.618	141.43	183.837
	25mM	0	0	0	0		0	0	4
	50mM	0	0.1	0.1	0		5	2.88675	4
	100mM	0.1	0.2	0.3	0.2		20	4.08248	4
	200mM	0.4	0.5	0.7	0.6		55	6.45497	4
	400mM	0.8	1	0.9	0.8		87.5	4.78714	4
	800mM	1	1	1	0.9		97.5	2.5	4
vehicle
failed	sucrose	group1	group2	group3	group4		mean (%)	SEM (%)	number			group1	group2	group3	group4
	6.25mM	0	0	0	0		0	0	4		αS:	1.16378	1.24284	1.41572	1.34856
	12.5mM	0	0	0	0		0	0	4		MAT	370.896	443.399	204.611	296.695
	25mM	0	0	0	0		0	0	4
	50mM	0	0	0	0		0	0	4
	100mM	0	0	0.2	0.1		7.5	4.78714	4
	200mM	0.3	0.2	0.5	0.3		32.5	6.29153	4
	400mM	0.6	0.5	0.8	0.7		65	6.45497	4
	800mM	0.7	0.7	0.9	0.8		77.5	4.78714	4
vehicle
satisfied	sucrose	group1	group2	group3	group4		mean (%)	SEM (%)	number			group1	group2	group3	group4
	6.25mM	0	0	0	0		0	0	4		αS:	1.63912	1.20806	1.65853	1.89928
	12.5mM	0	0	0	0		0	0	4		MAT	150.153	159.525	164.013	130.106
	25mM	0	0	0	0		0	0	4
	50mM	0.1	0	0	0.1		5	2.88675	4
	100mM	0.3	0.4	0.2	0.3		30	4.08248	4
	200mM	0.6	0.6	0.7	0.8		67.5	4.78714	4
	400mM	1	0.8	0.8	0.9		87.5	4.78714	4
	800mM	1	0.9	0.9	1		95	2.88675	4
Dopamine
naïve	sucrose	group1	group2	group3	group4		mean (%)	SEM (%)	number			group1	group2	group3	group4
	6.25mM	0	0	0	0		0	0	4		αS:	1.36275	1.22727	1.89942	1.97395
	12.5mM	0	0	0	0		0	0	4		MAT	77.4916	70.7107	65.0525	69.3898
	25mM	0.2	0.2	0.1	0.2		17.5	2.5	4
	50mM	0.2	0.3	0.3	0.2		25	2.88675	4
	100mM	0.7	0.7	0.8	0.8		75	2.88675	4
	200mM	0.8	0.8	0.9	0.9		85	2.88675	4
	400mM	1	1	1	1		100	0	4
	800mM	1	1	1	1		100	0	4
Dopamine
failed	sucrose	group1	group2	group3	group4		mean (%)	SEM (%)	number			group1	group2	group3	group4
	6.25mM	0	0	0	0		0	0	4		αS:	1.71589	1.06833	1.89942	1.07467
	12.5mM	0	0	0	0		0	0	4		MAT	93.9636	79.9476	76.861	84.4884
	25mM	0.1	0.2	0.1	0.2		15	2.88675	4
	50mM	0.1	0.3	0.2	0.2		20	4.08248	4
	100mM	0.6	0.6	0.7	0.7		65	2.88675	4
	200mM	0.8	0.8	0.9	0.7		80	4.08248	4
	400mM	1	0.9	1	0.9		95	2.88675	4
	800mM	1	1	1	1		100	0	4
Dopamine
satisfied	sucrose	group1	group2	group3	group4		mean (%)	SEM (%)	number			group1	group2	group3	group4
	6.25mM	0	0	0	0		0	0	4		αS:	1.36275	1.38929	1.70137	1.15741
	12.5mM	0	0	0	0		0	0	4		MAT	77.4916	73.6568	59.2447	77.9196
	25mM	0.2	0.1	0.1	0.2		15	2.88675	4
	50mM	0.2	0.3	0.4	0.3		30	4.08248	4
	100mM	0.7	0.7	0.8	0.6		70	4.08248	4
	200mM	0.8	0.8	0.9	0.8		82.5	2.5	4
	400mM	1	1	1	1		100	0	4
	800mM	1	1	1	1		100	0	4

## Sheet: Figure2-C
TH-GAL4/UAS-dTRPA1
naïve	sucrose	group1	group2	group3	group4		mean (%)	SEM (%)	number			group1	group2	group3	group4
	6.25mM	0	0	0	0		0	0	4		αS:	1.70137	2.16514	1.80969	1.80972
	12.5mM	0	0	0	0		0	0	4		MAT	84.3958	83.8622	105.138	95.1133
	25mM	0.1	0	0	0		2.5	2.5	4
	50mM	0.2	0.2	0.1	0.2		17.5	2.5	4
	100mM	0.6	0.6	0.5	0.5		55	2.88675	4
	200mM	0.9	1	0.8	0.9		90	4.08248	4
	400mM	1	1	1	1		100	0	4
	800mM	1	1	1	1		100	0	4
TH-GAL4/UAS-dTRPA1
failed	sucrose	group1	group2	group3	group4		mean (%)	SEM (%)	number			group1	group2	group3	group4
	6.25mM	0	0	0	0		0	0	4		αS:	1.70137	3.44585	1.79366	1.80969
	12.5mM	0	0	0	0		0	0	4		MAT	59.2447	76.5204	80.7358	105.138
	25mM	0.1	0	0	0		2.5	2.5	4
	50mM	0.4	0.1	0.2	0.1		20	7.07107	4
	100mM	0.8	0.8	0.7	0.5		70	7.07107	4
	200mM	0.9	0.9	0.8	0.8		85	2.88675	4
	400mM	1	1	1	1		100	0	4
	800mM	1	1	1	1		100	0	4
TH-GAL4/UAS-dTRPA1
satisfied	sucrose	group1	group2	group3	group4		mean (%)	SEM (%)	number			group1	group2	group3	group4
	6.25mM	0	0	0	0		0	0	4		αS:	1.63985	2.13134	1.60478	1.80972
	12.5mM	0	0	0	0		0	0	4		MAT	75.0748	77.9368	89.9778	95.1133
	25mM	0.1	0	0	0		2.5	2.5	4
	50mM	0.3	0.2	0.2	0.2		22.5	2.5	4
	100mM	0.6	0.7	0.6	0.5		60	4.08248	4
	200mM	1	0.9	0.8	0.9		90	4.08248	4
	400mM	1	1	1	1		100	0	4
	800mM	1	1	1	1		100	0	4
TH-GAL4/+
naïve	sucrose	group1	group2	group3	group4		mean (%)	SEM (%)	number			group1	group2	group3	group4
	6.25mM	0	0	0	0		0	0	4		αS:	1.46092	1.42487	2.6195	2.82116
	12.5mM	0	0	0	0		0	0	4		MAT	414.284	463.393	718.405	282.844
	25mM	0	0	0	0		0	0	4
	50mM	0	0	0	0		0	0	4
	100mM	0	0	0	0		0	0	4
	200mM	0.1	0.1	0	0.2		10	4.08248	4
	400mM	0.6	0.5	0.1	0.8		50	14.7196	4
	800mM	0.7	0.7	0.6	1		75	8.66025	4
TH-GAL4/+
failed	sucrose	group1	group2	group3	group4		mean (%)	SEM (%)	number			group1	group2	group3	group4
	6.25mM	0	0	0	0		0	0	4		αS:	9.67512	9.94658	1.49943	1.86485
	12.5mM	0	0	0	0		0	0	4		MAT	883.533	848.659	1177.59	928.574
	25mM	0	0	0	0		0	0	4
	50mM	0	0	0	0		0	0	4
	100mM	0	0	0	0		0	0	4
	200mM	0	0	0	0		0	0	4
	400mM	0	0	0.1	0.1		5	2.88675	4
	800mM	0.2	0.3	0.3	0.4		30	4.08248	4
TH-GAL4/+
satisfied	sucrose	group1	group2	group3	group4		mean (%)	SEM (%)	number			group1	group2	group3	group4
	6.25mM	0	0	0	0		0	0	4		αS:	1.70453	2.08609	1.75707	2.97385
	12.5mM	0	0	0	0		0	0	4		MAT	526.33	433.455	422.984	244.083
	25mM	0	0	0	0		0	0	4
	50mM	0	0	0	0		0	0	4
	100mM	0	0	0	0		0	0	4
	200mM	0	0	0.1	0.3		10	7.07107	4
	400mM	0.4	0.5	0.5	0.9		57.5	11.0868	4
	800mM	0.7	0.8	0.8	0.9		80	4.08248	4
+/UAS-dTRPA1
naïve	sucrose	group1	group2	group3	group4		mean (%)	SEM (%)	number			group1	group2	group3	group4
	6.25mM	0	0	0	0		0	0	4		αS:	1.87703	0.848256	1.29731	1.09013
	12.5mM	0	0	0	0		0	0	4		MAT	807.93	1138.05	968.557	856.458
	25mM	0	0	0	0		0	0	4
	50mM	0	0	0	0		0	0	4
	100mM	0	0	0	0		0	0	4
	200mM	0.1	0.125	0	0.1		8.125	2.77169	4
	400mM	0.1	0.25	0.2	0.3		21.25	4.26956	4
	800mM	0.5	0.375	0.4	0.5		44.375	3.28744	4
+/UAS-dTRPA1
failed	sucrose	group1	group2	group3	group4		mean (%)	SEM (%)	number			group1	group2	group3	group4
	6.25mM	0	0	0	0		0	0	4		αS:	9.64712	9.6047	9.6047	9.25331
	12.5mM	0	0	0	0		0	0	4		MAT	928.918	1537.84	1537.84	1323.25
	25mM	0	0	0	0		0	0	4
	50mM	0	0	0	0		0	0	4
	100mM	0	0	0	0		0	0	4
	200mM	0	0	0	0		0	0	4
	400mM	0	0	0	0		0	0	4
	800mM	0.111111	0	0	0.1		5.27778	3.05555	4
+/UAS-dTRPA1
satisfied	sucrose	group1	group2	group3	group4		mean (%)	SEM (%)	number			group1	group2	group3	group4
	6.25mM	0	0	0	0		0	0	4		αS:	1.15199	0.887379	1.32068	1.09013
	12.5mM	0	0	0	0		0	0	4		MAT	667.954	936.294	450.82	776.294
	25mM	0	0	0	0		0	0	4
	50mM	0	0	0	0		0	0	4
	100mM	0	0	0	0		0	0	4
	200mM	0.111111	0.142857	0.111111	0.1		11.627	0.924127	4
	400mM	0.333333	0.285714	0.555556	0.3		36.8651	6.30954	4
	800mM	0.555556	0.428571	0.666667	0.5		53.7698	5.02342	4

## Sheet: Figure2-D
TH-GAL4/UAS-Shits
naïve	sucrose	group1	group2	group3	group4	group5	group6		mean (%)	SEM (%)	number			group1	group2	group3	group4	group5	group6
	50mM	0	0	0	0	0	0		0	0	6		αS:	10	10	3.99834	10	8.21499	10
	100mM	0	0	0	0	0	0		0	0	6		MAT	1414.44	1293.72	1191.82	1362.98	1116.08	1293.72
	200mM	0	0	0	0	0	0		0	0	6
	400mM	0	0	0.1	0	0	0		1.66667	1.66667	6
	800mM	0	0	0.2	0	0.1	0		5	3.41565	6
	1000mM	0	0	0.2	0	0.2	0		6.66667	4.21637	6
	1500mM	0.7	0.9	0.8	0.8	1	0.9		85	4.28174	6
	2000mM	1	1	1	1	1	1		100	0	6
TH-GAL4/UAS-Shits
failed	sucrose	group1	group2	group3	group4	group5	group6		mean (%)	SEM (%)	number			group1	group2	group3	group4	group5	group6
	50mM	0	0	0	0	0	0		0	0	6		αS:	10	10	10	10	10	10
	100mM	0	0	0	0	0	0		0	0	6		MAT	1414.44	1414.44	1362.98	1414.44	1293.72	1295.32
	200mM	0	0	0	0	0	0		0	0	6
	400mM	0	0	0	0	0	0		0	0	6
	800mM	0	0	0	0	0	0		0	0	6
	1000mM	0	0	0	0	0	0		0	0	6
	1500mM	0.7	0.7	0.8	0.7	0.9	0.9		78.3333	4.01386	6
	2000mM	1	1	1	1	1	0.9		98.3333	1.66667	6
TH-GAL4/UAS-Shits
satisfied	sucrose	group1	group2	group3	group4	group5	group6		mean (%)	SEM (%)	number			group1	group2	group3	group4	group5	group6
	50mM	0	0	0	0	0	0		0	0	6		αS:	10	10	10	10	7.10438	10
	100mM	0	0	0	0	0	0		0	0	6		MAT	1224.78	1224.78	1362.98	1224.78	1218.18	1224.78
	200mM	0	0	0	0	0	0		0	0	6
	400mM	0	0	0	0	0.1	0		1.66667	1.66667	6
	800mM	0	0	0	0	0.1	0		1.66667	1.66667	6
	1000mM	0	0	0	0	0.1	0		1.66667	1.66667	6
	1500mM	1	1	0.8	1	0.9	1		95	3.41565	6
	2000mM	1	1	1	1	1	1		100	0	6
TH-GAL4/+
naïve	sucrose	group1	group2	group3	group4	group5	group6		mean (%)	SEM (%)	number			group1	group2	group3	group4	group5	group6
	6.25mM	0	0	0	0	0	0		0	0	6		αS:	1.21501	1.30154	1.17613	0.980657	1.21501	1.32774
	12.5mM	0	0	0	0	0	0		0	0	6		MAT	584.784	757.648	527.053	627.981	584.784	638.642
	25mM	0	0	0	0	0	0		0	0	6
	50mM	0	0	0	0	0	0		0	0	6
	100mM	0	0	0	0	0	0		0	0	6
	200mM	0.1	0	0.1	0.1	0.1	0.1		8.33333	1.66667	6
	400mM	0.4	0.3	0.5	0.5	0.4	0.3		40	3.65148	6
	800mM	0.6	0.5	0.6	0.5	0.6	0.6		56.6667	2.10819	6
TH-GAL4/+
failed	sucrose	group1	group2	group3	group4	group5	group6		mean (%)	SEM (%)	number			group1	group2	group3	group4	group5	group6
	6.25mM	0	0	0	0	0	0		0	0	6		αS:	9.86016	9.90178	1.29374	9.90178	9.90178	9.86016
	12.5mM	0	0	0	0	0	0		0	0	6		MAT	881.888	848.886	1600	848.886	848.886	881.888
	25mM	0	0	0	0	0	0		0	0	6
	50mM	0	0	0	0	0	0		0	0	6
	100mM	0	0	0	0	0	0		0	0	6
	200mM	0	0	0	0	0	0		0	0	6
	400mM	0	0	0.1	0	0	0		1.66667	1.66667	6
	800mM	0.2	0.3	0.2	0.3	0.3	0.2		25	2.23607	6
TH-GAL4/+
satisfied	sucrose	group1	group2	group3	group4	group5	group6		mean (%)	SEM (%)	number			group1	group2	group3	group4	group5	group6
	6.25mM	0	0	0	0	0	0		0	0	6		αS:	1.637	1.90312	1.33535	1.56712	1.90312	1.56712
	12.5mM	0	0	0	0	0	0		0	0	6		MAT	477.512	685.367	542.623	645.208	685.367	645.208
	25mM	0	0	0	0	0	0		0	0	6
	50mM	0	0	0	0	0	0		0	0	6
	100mM	0	0	0	0	0	0		0	0	6
	200mM	0	0	0	0	0	0		0	0	6
	400mM	0.5	0.2	0.5	0.3	0.2	0.3		33.3333	5.57773	6
	800mM	0.7	0.6	0.6	0.6	0.6	0.6		61.6667	1.66667	6
+/UAS-Shits
naïve	sucrose	group1	group2	group3	group4	group5	group6		mean (%)	SEM (%)	number			group1	group2	group3	group4	group5	group6
	6.25mM	0	0	0	0	0	0		0	0	6		αS:	1.90312	1.90312	1.25374	2.29129	1.90312	1.33837
	12.5mM	0	0	0	0	0	0		0	0	6		MAT	685.367	685.367	494.669	616.741	685.367	547.115
	25mM	0	0	0	0	0	0		0	0	6
	50mM	0	0	0	0	0	0		0	0	6
	100mM	0	0	0	0	0	0		0	0	6
	200mM	0	0	0.2	0	0	0.2		6.66667	4.21637	6
	400mM	0.2	0.2	0.4	0.2	0.2	0.3		25	3.41565	6
	800mM	0.6	0.6	0.7	0.7	0.6	0.7		65	2.23607	6
+/UAS-Shits
failed	sucrose	group1	group2	group3	group4	group5	group6		mean (%)	SEM (%)	number			group1	group2	group3	group4	group5	group6
	6.25mM	0	0	0	0	0	0		0	0	6		αS:	9.86016	9.88226	9.90178	9.90178	9.86016	9.90178
	12.5mM	0	0	0	0	0	0		0	0	6		MAT	881.888	823.078	848.886	848.886	881.888	848.886
	25mM	0	0	0	0	0	0		0	0	6
	50mM	0	0	0	0	0	0		0	0	6
	100mM	0	0	0	0	0	0		0	0	6
	200mM	0	0	0	0	0	0		0	0	6
	400mM	0	0	0	0	0	0		0	0	6
	800mM	0.2	0.4	0.3	0.3	0.2	0.3		28.3333	3.07318	6
+/UAS-Shits
satisfied	sucrose	group1	group2	group3	group4	group5	group6		mean (%)	SEM (%)	number			group1	group2	group3	group4	group5	group6
	6.25mM	0	0	0	0	0	0		0	0	6		αS:	2.29129	3.05183	1.90312	2.29129	2.6195	1.90312
	12.5mM	0	0	0	0	0	0		0	0	6		MAT	616.741	659.862	685.367	616.741	718.405	685.367
	25mM	0	0	0	0	0	0		0	0	6
	50mM	0	0	0	0	0	0		0	0	6
	100mM	0	0	0	0	0	0		0	0	6
	200mM	0	0	0	0	0	0		0	0	6
	400mM	0.2	0.1	0.2	0.2	0.1	0.2		16.6667	2.10819	6
	800mM	0.7	0.7	0.6	0.7	0.6	0.6		65	2.23607	6
