# Supplementary material for: Sexual failure decreases sweet taste perception in male Drosophila via dopaminergic signaling
Source: eLife. 2025 Jul 23;14:RP105094. doi: 10.7554/eLife.105094 (PMC12286605; doi:10.7554/eLife.105094)
Supplement: Figure 3—figure supplement 1—source data 1. [file elife-105094-fig3-figsupp1-data1.xlsx]

## Sheet: Figure3-supplement1-C
UAS-CsChrimson/Gr5a-LexA;																										UAS-CsChrimson/Gr5a-LexA;
LexAop-GCaMP6m/ TH-GAL4																										LexAop-GCaMP6m/+
naïve																										naïve
pre												post														pre								post
-0.04694	0.009245	0.053933	-0.1339	0.019403	-0.11332	-0.00244	-0.02537	0.006389	0.109888	-0.09069		-0.00218	-0.11606	0.011811	-0.1177	0.033475	-0.10272	0.01704	-0.55791	-0.09048	-0.04145	1.27785	-0.11583	-0.15209		-0.00953	0.076765	-0.05535	-0.04542	0.070472	-0.06578	0.014938		0.009541	-0.0346	-0.02523	0.040041	-0.02761	0.093727	-0.07212	-0.02683	-0.03783
-0.01322	0.002501	0.01157	-0.1023	0.045789	-0.13598	-0.02072	-0.06381	-0.0781	0.039685	-0.00682		-0.03287	0.123026	0.037339	-0.0746	0.043827	0.115244	0.041341	-0.50531	-0.07563	0.045395	0.55663	-0.01135	-0.18404		-0.00712	0.15858	-0.01031	-0.01653	0.044098	-0.04589	-0.01321		-0.00966	-0.05198	-0.08582	0.004649	-0.00728	0.078102	-0.06348	-0.03284	0.052589
-0.02274	0.065192	-0.04131	0.009669	0.027938	-0.06728	-0.11438	-0.04183	-0.04556	-0.00039	0.080698		-0.06902	-0.08651	-0.04358	-0.07491	0.050116	-0.07926	-0.00095	-0.30816	-0.09415	0.011414	0.52088	-0.02584	-0.16009		0.004776	0.027701	-0.01155	0.012206	0.04479	-0.03692	-0.08992		-0.01181	0.021073	-0.02829	-0.00631	0.014855	0.05255	-0.01992	-0.03367	0.075587
0.014802	-0.07094	0.020099	-0.02465	-0.04914	0.045413	-0.02462	0.001894	-0.00914	0.03279	-0.15647		-0.08052	0.031903	-0.10734	-0.05068	0.030567	0.333571	0.001786	-0.33196	-0.03983	-0.01659	0.434462	0.014952	0.08287		0.039279	0.027987	0.034485	0.000843	0.054602	-0.0573	-0.06813		0.023236	0.005205	-0.04559	-0.01354	-0.01745	-0.00232	-0.05324	-0.03827	-0.06459
0.017589	-0.06254	0.06408	-0.05155	-0.02459	-0.02313	-0.00709	0.012297	0.01803	0.117726	-0.32609		-0.00662	0.079913	-0.10365	-0.12684	0.033457	0.131074	0.005482	-0.30226	-0.05684	-0.11572	0.096083	0.004471	-0.01003		-0.00892	0.026924	0.014821	0.020439	0.022271	-0.02419	-0.01494		-0.04037	0.012491	-0.04093	0.013419	-0.00394	0.019998	-0.01442	-0.10825	0.003667
-0.03608	-0.06356	-0.02108	0.041391	-0.02402	-0.07866	0.023934	0.015852	-0.00382	-0.0276	0.06521		0.023666	0.057738	-0.06905	-0.04222	0.071803	-0.05652	-0.03293	0.0133	-0.02354	0.049316	0.164043	-0.00934	0.032037		-0.01629	0.076493	0.011279	-0.04402	0.011752	-0.00522	0.027994		0.006019	-0.0546	0.008179	-0.0073	-0.02474	0.023813	-0.1013	-0.02386	-0.07877
-0.04775	0.038404	-0.00168	0.069697	-0.03374	-0.12532	0.014852	0.030756	0.069988	0.014768	-0.22243		-0.04202	-0.02973	-0.10465	-0.04798	-0.02651	0.113022	0.00361	-0.10153	-0.01697	-0.08992	-0.0475	0.064154	0.015318		-0.05426	-0.07692	0.039772	0.026896	-0.02274	0.006993	0.050316		0.016815	0.030545	-0.06086	-0.02795	-0.0177	-0.00639	0.184474	-0.01741	-0.03181
-0.03758	0.008808	-0.0525	-0.02336	0.023582	-0.14076	-0.06141	-0.00516	0.019248	0.057393	0.02957		-0.01354	0.058922	0.070288	0.117468	-0.01782	0.075013	0.027984	-0.0697	-0.00816	-0.09936	-0.08927	-0.01995	-0.03863		-0.02615	0.027031	0.009069	-0.02309	-0.02822	0.009656	-0.05763		0.009958	0.053607	0.115252	0.021346	0.003119	-0.01464	0.067557	0.057239	-0.09376
-0.02524	-0.02609	0.076809	0.041512	0.0236	-0.17771	0.054962	-0.01462	-0.01831	-0.07429	-0.0837		0.030861	0.011611	0.029461	-0.01852	-0.05958	-0.06531	0.023529	-0.00371	0.002518	-0.0465	0.037133	0.019584	0.013013		0.003915	0.056667	0.032932	-0.02798	-0.03388	0.025101	0.048139		0.014989	-0.03781	-0.04117	0.008579	-0.04031	-0.04586	-0.0005	-0.01654	0.050627
-0.0044	-0.03549	0.042127	0.086619	0.026421	0.132834	-0.01035	-0.00315	0.041162	-0.03547	-0.17383		0.070069	-0.08527	-0.05387	0.05002	-0.05953	0.088506	-0.02312	0.395111	0.023724	-0.05696	0.078828	-0.00185	-0.12444		-0.01617	0.074613	-0.01505	-0.05322	-0.02415	0.017545	0.048692		-0.01997	0.047211	0.01122	0.065772	-0.02277	-0.04049	0.000831	0.013018	0.10386
-0.00268	0.019284	-0.0808	0.06948	-0.00707	0.04821	0.106424	-0.01005	0.018996	-0.11643	0.130334		0.006643	-0.0033	0.091724	0.005306	-0.07428	-0.09818	-0.00699	0.178659	0.038288	0.041184	-0.11243	0.013031	-0.15521		0.02443	-0.11266	-0.03269	0.061334	-0.05487	0.017201	0.063151		-0.01743	-0.05054	-0.01351	0.118499	-0.02387	-0.0237	-0.09844	0.028806	-0.08244
0.032989	0.017333	0.031507	-0.00967	-0.04089	0.095776	-0.00622	-0.00647	0.002178	0.046493	0.061105		0.016972	-0.02773	0.17179	0.115043	-0.01014	0.077698	-0.00138	0.246241	0.057868	0.056431	-0.07953	0.037664	-0.23112		0.041472	-0.1618	-0.04998	0.009602	-0.02927	0.029622	-0.01191		0.002188	-0.01248	0.026411	-0.00822	-0.04323	0.009177	-0.04045	0.075428	0.032486
0.066227	0.019526	-0.07749	0.03524	-0.00268	0.222512	0.038895	-0.01634	0.029256	-0.00818	-0.15162		0.035248	0.026951	0.090136	0.074462	-0.06755	-0.15643	0.002472	0.344276	0.111495	0.037916	0.080908	0.046331	-0.15973		0.042639	-0.1441	-0.00971	0.006328	-0.0429	0.028132	-0.003		0.009561	0.039058	0.027541	-0.05996	-0.02323	-0.03789	-0.05323	0.04711	0.012448
0.058694	0.036045	0.011488	-0.04488	-0.03801	0.140825	-0.01216	-0.00164	-0.06336	0.004412	8.68e-05		0.0179	0.053271	0.030408	0.093317	-0.00371	-0.17469	-0.04975	0.502863	0.05565	0.162295	0.1272	0.044943	-0.08834		-0.00651	-0.06966	-0.00252	0.04922	-0.03171	0.035303	0.00942		0.015208	0.03856	0.094187	-0.1076	0.088981	-0.03294	0.084345	0.000603	-0.05677
0.046332	0.042289	-0.03675	0.036705	0.053412	0.176585	0.020324	0.127682	0.013043	-0.05092	-0.05421		0.045401	-0.09474	-0.05082	0.097817	0.055862	-0.20102	-0.00812	0.500098	0.116055	0.062555	0.074852	-0.06098	-0.03484		-0.01157	0.012372	0.044797	0.023398	0.019757	0.06574	-0.00391		-0.00827	-0.05631	0.047709	-0.04143	0.145165	-0.07313	0.179897	0.075454	-0.50897
2.16256	0.674872	1.18814	1.39932	1.29865	0.85943	0.753826	0.374754	0.36075	1.27453	0.891665		1.35596	1.43815	0.9671	1.39259	2.42399	0.866619	0.81228	2.80131	2.49044	1.80218	3.8061	2.11261	3.81126		0.980325	0.778681	1.01762	0.221342	0.796788	1.04939	2.12074		0.960545	0.72012	0.674636	2.3042	1.72914	0.432848	2.42013	1.25025	1.16751
2.35172	0.912277	1.65072	1.43972	0.974662	0.776953	0.86193	1.15969	1.52185	0.459529	2.618		2.4161	1.25692	2.61629	1.00144	2.36373	1.43746	1.34445	2.56034	2.45902	3.5052	2.40618	3.90075	4.46035		1.12828	0.268696	1.82173	1.21234	1.09134	1.02147	1.86895		0.677184	0.562652	0.765389	1.95758	1.59353	0.925365	2.09635	1.4464	1.30913
2.49028	0.832541	1.62674	1.28287	0.540356	0.698542	0.665806	1.03915	1.42953	-0.11402	0.809468		1.87824	0.381809	2.02352	0.725959	2.67273	1.02724	1.04279	1.30926	1.96356	3.13959	2.54367	1.92715	3.58452		1.04579	0.426255	1.78136	1.50479	1.00089	0.6908	1.62278		0.492838	0.508455	0.408277	1.32681	1.18534	0.931154	1.9409	0.473404	2.16188
1.97425	0.726929	1.56262	1.11429	0.254741	0.690991	0.471836	1.05971	0.840575	-0.1725	0.325239		1.7125	-0.03586	1.48469	1.8611	2.5736	0.350048	0.599447	0.916626	1.88532	2.60468	3.26293	0.978845	3.0418		1.03617	0.387188	1.58159	1.5098	0.819879	0.984553	1.50767		0.367704	0.345585	0.277379	0.536482	0.438823	0.650787	1.88244	0.011115	1.66964
1.57145	0.611748	1.45259	1.09523	0.14759	0.584382	0.427534	0.692185	0.654417	-0.20794	0.270098		0.555191	-0.17047	0.491349	1.46165	2.32579	-0.10317	0.286085	0.570092	1.26705	2.3332	1.93054	0.558247	2.511		0.919427	0.417428	1.44557	1.41643	0.458103	0.625237	1.35914		0.229899	0.155779	0.422097	0.138561	0.075505	0.223132	0.982704	-0.19519	1.3908
1.31167	0.554571	1.53165	0.938679	0.102124	0.459973	0.197878	0.386249	0.389692	-0.08653	0.2826		0.057309	-0.22532	0.197593	1.30686	2.22981	-0.11525	-0.0482	0.728042	0.640298	2.12123	1.63863	0.341159	2.5673		1.52167	0.320423	0.955412	1.1951	0.150129	0.619953	1.26308		0.28668	0.134776	0.232755	0.05242	-0.07331	0.076568	0.439482	-0.31972	1.1891
1.35057	0.426012	1.25837	0.840292	0.031272	0.431146	-0.00052	0.236275	0.248608	-0.17956	0.457632		-0.01622	-0.27677	-0.05045	1.09752	1.95778	-0.1223	-0.20142	0.702491	0.414698	2.03722	1.18527	0.220342	2.33121		1.41233	0.149275	0.584864	1.18516	0.010795	0.677842	1.11208		0.230971	0.087541	0.127393	-0.02902	-0.09321	-0.02786	0.240608	-0.21228	0.961081
1.22603	-0.06835	1.06825	0.779013	0.01293	0.45336	-0.00995	0.227338	0.37269	-0.25105	0.302567		-0.08403	-0.26041	-0.18319	1.0542	1.75076	-0.3214	-0.27377	0.255622	0.256805	1.69608	1.2683	0.102171	2.0131		1.27123	0.098292	0.305347	1.31593	-0.03177	0.61608	1.59836		0.21554	0.103652	0.239195	0.042781	-0.08066	-0.07289	0.253496	-0.21565	0.561113
1.06739	-0.16873	1.04614	0.581185	0.049455	0.443462	-0.03114	0.16959	0.085378	-0.20588	0.583214		-0.20459	-0.30869	0.176706	0.932184	1.6607	-0.34969	-0.25625	0.125627	0.188694	1.52668	1.14905	0.001782	1.89259		1.13571	0.155824	0.178535	1.1806	-0.0309	0.553288	1.23208		0.199881	0.147059	0.006708	0.194544	-0.09472	-0.10479	0.245227	-0.14711	0.576777
1.07534	-0.23811	1.03988	0.585539	0.054283	0.363293	0.019102	0.094451	-0.00452	-0.08868	0.270751		-0.25804	-0.09604	-0.02547	1.04504	1.67359	-0.50238	-0.28703	0.222826	0.143372	1.40727	1.20803	0.023747	1.89522		1.01677	0.074241	0.124127	1.19036	-0.07852	0.474024	1.56794		0.145362	0.140755	-0.09664	-0.07791	-0.1148	-0.10093	-0.0742	-0.1092	0.452075
1.00932	-0.31661	0.913079	0.678759	0.263329	0.324217	0.041631	0.124758	-0.11959	-0.05492	0.386724		-0.36263		-0.19305	1.04241	1.71485	-0.43965	-0.23088	0.238565	0.071014	1.32841	1.28774	0.005069	1.60291		0.927108	0.111914	0.102689	1.08669	-0.10135	0.363565	1.55136		0.180133	0.043973	0.032635	0.08372	-0.10933	-0.12822	-0.01339	-0.06242	0.386748
0.780897		0.852346	0.632507	0.119042	0.256983	0.028882	0.050845	-0.15856	0.074386	0.378233		-0.37532		-0.0692	0.887859	1.67155	-0.39435	-0.27247		0.07454	1.09679	1.31302	0.123282	1.57173		0.864259	0.966268	0.150787	1.07735	-0.07078	0.35688	0.999423		0.141819	0.092908	-0.04013	-0.03371	-0.12299	-0.12979	-0.12174	-0.01708	0.202766
0.636957		0.848021	0.473911	0.098131	0.271417	-0.0114	0.052847	-0.15469	0.00753	0.315535		-0.38948		-0.07045	0.966655	1.44384	-0.21065	-0.27164		0.099737	1.15723	0.955162	-0.03555	1.61172		0.805703	0.509678	0.037765	1.02714	-0.05391	0.311444	0.978484		0.177633	-0.00644	-0.21824	0.000482	-0.12675	-0.16164	-0.11609	0.007398
0.555814		0.765441	0.403618	0.039098	0.287738	0.041747	0.023302	-0.13415	0.15915	0.506521		-0.43949		-0.05732	0.863126	1.39582	-0.42742	-0.30498		0.08092	1.30075	1.26687	-0.00607	1.69875		0.905396	0.291518	0.063123	0.998808	-0.07866	0.280229	0.867221		0.119502	-0.02776	-0.21054	0.004976	-0.12525	-0.11142	-0.23029	0.070409
0.498891		0.540878	0.377586	0.011086	0.306227	0.021896	0.028775	-0.14915	0.134605	0.233898		-0.44145		-0.08746	0.883475	1.47165	-0.5014	-0.28255		0.127507	1.39867	1.00419	0.059842	1.68894		0.880269	0.221871	-0.01881	0.911646	-0.09507	0.288221	0.558217		0.094435	-0.01649	-0.06401	-0.07868	-0.13728	-0.12486		0.103657
0.446187		0.634471	0.296579	0.02287	0.297288	0.098099	0.039981	-0.16478	0.003954	0.320853				-0.15901	0.750013	1.31337	-0.56054	-0.27244		0.094842	1.21173	0.915364	-0.00044	1.75306		0.830304	0.569694	0.019398	0.915585	-0.10906	0.212379	0.455357		0.094356	0.048831	-0.08794	-0.11936	-0.11071	-0.17093		0.122191
	UAS-CsChrimson/Gr5a-LexA;				UAS-CsChrimson/Gr5a-LexA;
	LexAop-GCaMP6m/ TH-GAL4				LexAop-GCaMP6m/+
naïve					naïve
pre	post				pre	post
1.65072	2.4161				2.12074	2.42013
0.912277	1.43815				1.82173	1.72914
2.49028	2.61629				1.52167	1.4464
1.43972	1.8611				1.5098	0.960545
1.29865	2.67273				1.09134	0.931154
0.85943	1.43746				1.04939	0.765389
0.86193	1.34445				0.778681	0.72012
1.52185	2.80131					2.16188
1.15969	2.49044					2.3042
1.27453	3.5052
2.618	3.8061
	3.90075
	4.46035

## Sheet: Figure3-supplement1-D
UAS-CsChrimson/Gr5a-LexA;														UAS-CsChrimson/Gr5a-LexA;
LexAop-GCaMP6m/ TH-GAL4														LexAop-GCaMP6m/+
failed														failed
pre							post							pre							post
-0.01281	-0.02404	0.164423	-0.06523	-0.00816	0.16557		0.033782	-0.13879	0.222208	-0.13592	-0.04321	0.026024		0.262727	0.02997	0.106536	0.064011	0.210855	-0.03689		-0.21147	0.216509	0.12583	0.115079	0.172351	-0.00333
0.046167	0.060077	0.017444	-0.06416	0.005117	0.106588		0.056523	0.002391	0.116759	0.002677	-0.18216	-0.00763		0.235679	0.031931	0.046154	0.248983	0.217422	-0.10683		-0.14119	0.200075	0.091722	0.182607	0.130421	-0.01267
-0.07275	0.072268	-0.00043	-0.05233	-0.01972	0.022502		0.093437	-0.03547	-0.00249	-0.06939	-0.04067	0.0014		0.004561	0.04864	0.024087	-0.11978	0.121029	-0.12441		0.028475	0.040002	0.057213	0.124189	0.12443	0.026358
-0.09372	0.196396	-0.0155	-0.04866	-0.04112	0.004652		0.186805	0.118537	0.027016	-0.15535	-0.03904	0.031367		0.059765	-0.00565	0.009629	-0.05262	-0.01548	-0.00292		0.072194	0.036466	0.083255	0.120136	0.093718	0.054185
0.045824	-0.06516	-0.01084	-0.00313	-0.00446	-0.03499		0.020159	-0.02364	-0.06898	-0.18262	0.02691	0.010686		-0.15218	0.084224	-0.08066	0.507217	-0.01425	-0.04978		-0.05462	0.079943	0.000516	0.172528	0.101838	-0.00333
-0.12187	-0.10162	0.045513	-0.02729	-0.00142	-0.09374		0.024803	-0.01557	-0.09979	-0.07707	0.136867	-0.02674		0.080843	0.056715	0.000421	-0.0004	-0.07528	-0.04234		0.025869	-0.20952	-0.02961	-0.01298	-0.00524	-0.02568
-0.01789	-0.05485	-0.07076	0.002339	-0.00975	-0.06612		0.013988	0.069538	0.038613	-0.03757	0.000957	-0.01122		0.028544	0.04888	0.01682	-0.08035	0.021448	-0.01569		-0.06012	-0.11445	-0.03497	-0.06355	-0.12009	-0.01357
0.052806	0.069275	-0.08699	0.004919	-0.05053	-0.0279		0.047849	0.019787	-0.03752	0.108183	-0.02177	-0.01625		-0.22561	-0.04869	-0.00498	-0.09884	0.052086	0.088471		-0.0843	-0.04997	-0.11206	0.006108	-0.01175	-0.01182
0.123719	-0.09586	0.000504	0.015784	0.047939	-0.02661		-0.04377	0.106397	0.042122	-0.10906	-0.05437	-0.00613		-0.09201	-0.05776	-0.0213	-0.02833	-0.07151	0.144101		0.071398	-0.03811	-0.05559	-0.05274	-0.06125	0.019911
0.087312	-0.03435	0.04195	-0.01022	-0.03129	-0.00542		0.01469	-0.07796	-0.02333	0.197213	-0.05255	-0.02888		-0.2068	0.035855	-0.05981	0.318803	0.017161	0.057852		-0.05853	0.029081	-0.07859	-0.07216	-0.04858	-0.00943
-0.04395	0.019624	-0.02833	0.026552	-0.01306	-0.08245		-0.12766	-0.11075	-0.18671	0.177991	-0.03873	-0.01291		0.047562	-0.03131	-0.05829	0.183786	-0.10674	-0.01253		-0.00837	0.065173	-0.0654	-0.13978	-0.07607	-0.01476
0.03451	0.014304	0.010208	0.051	0.035707	-0.00177		0.01404	-0.14004	-0.03987	0.10812	-0.05164	0.044568		-0.03881	-0.04151	0.030022	-0.09274	-0.034	0.02494		0.06054	0.020032	-0.1506	-0.16202	-0.05646	-0.00259
-0.00258	-0.06527	-0.07449	0.050004	0.021399	0.021873		-0.05557	0.052829	-0.04238	-0.09703	-0.04863	0.013775		0.050098	-0.02804	-0.02777	-0.33947	-0.16697	-0.06153		0.102667	-0.05964	-0.04561	-0.18462	-0.11566	0.000505
0.04863	0.065286	-0.0115	0.051301	-0.0028	0.007831		-0.14909	0.010588	0.104754	0.059387	0.033681	-0.03231		-0.00241	-0.05201	0.027549	-0.28725	-0.05791	0.058255		0.120038	-0.18986	-0.10674	-0.14006	-0.09195	0.030536
-0.0734	-0.05607	0.018815	0.069125	-0.0413	0.009984		-0.12998	0.162155	-0.0504	0.210453	0.374333	0.076241		-0.02006	-0.07125	-0.00841	-0.22304	-0.09786	0.079298		0.13741	-0.02573	0.276222	-0.20835	-0.03571	-0.03431
0.576342	0.410295	0.68474	1.18753	0.271049	0.866336		1.24112	1.08945	0.148984	1.84748	2.1169	1.6308		0.230819	0.757177	0.485451	0.77381	0.80999	0.320657		0.717479	0.940111	0.554756	0.33518	0.873392	0.626147
0.76592	0.594049	0.491382	1.23877	0.720169	0.619379		0.511238	2.22401	1.21621	2.16144	2.2016	1.68206		0.926077	0.952753	0.574216	0.81344	1.13039	0.493464		0.359912	0.965801	0.608078	1.22228	1.08646	0.786086
0.647317	0.377268	0.381025	1.15976	0.622192	0.354008		0.441753	2.01975	1.10406	1.84662	1.31975	1.47985		0.499287	0.420427	0.335353	0.577135	0.599204	0.248541		0.223906	0.752996	0.488452	0.888351	0.795033	0.703281
0.416376	0.194955	0.167164	0.506525	0.434296	0.070986		0.251633	1.41774	0.87232	1.75134	0.306848	0.810947		0.187976	0.259157	0.21265	0.570153	0.097507	0.076881		-0.21162	0.699326	0.187089	0.475825	0.598503	0.63991
0.235901	0.153062	0.16064	0.107787	0.169557	0.106356		0.085849	1.41399	0.766785	1.02183	-0.04111	0.341058		0.125006	0.18256	0.096529	-0.27634	-0.30653	0.079391		-0.05122	0.763709	-0.19205	-0.00126	0.772143	0.568074
0.15997	-0.25102	-0.00059	-0.04857	0.065618	0.024986		-0.01589	1.27281	0.565024	0.629239	-0.08841	0.163223		0.054218	0.094911	0.066015	-0.49651	-0.36512	0.024599		-0.02704	0.540398	-0.2335	-0.11085	0.583661	0.568534
0.296527	-0.13975	-0.08738	-0.09009	0.019281	0.133678		-0.03453	0.825492	0.651044	1.0595	-0.13777	0.041075		-0.10057	-0.02996	0.021918	-0.41676	-0.3356	0.11751		-0.03211	0.158159	-0.31073	-0.00243	0.378437	0.47964
0.131667	0.020843	-0.09812	-0.0921	-0.05308	0.111588		-0.02183	0.807845	0.460645	0.934211	-0.14338	0.056089		-0.09243	-0.01679	0.157443	-0.4913	-0.4462	0.183986		-0.19142	0.19321	-0.24217	-0.09987	0.252611	0.402449
0.300891	-0.25246	-0.01989	-0.10275	0.037989	0.077544		-0.06485	0.792826	0.456301	0.601378	-0.25071	0.004301		-0.10875	-0.03593	0.091659	-0.3615	-0.43769	0.136663		-0.27799	0.240223	-0.28237	-0.09523	0.216637	0.294323
0.190891	-0.19328	-0.15832	-0.06299	0.032397	0.062873		-0.12959	0.70265	0.395103	0.738105	-0.20545	0.060723		-0.06998	-0.06533	0.032343	-0.3319	-0.46025	0.123987		-0.17419	0.156598	-0.2637	-0.0906	0.06071	0.25422
0.243662	-0.07491	-0.1462	-0.08171	-0.08468	0.116192		-0.09128	0.756906	0.368783	0.929688	-0.25776	0.041613		0.056067	-0.10356	-0.04649	-0.27014	-0.57876	0.089587		0.065317	-0.06952	-0.23727	-0.05066	0.17558	0.257335
0.130296	-0.0676	-0.16939	-0.08975	-0.12388	0.083604		-0.13752	0.539569	0.253192	0.880956	-0.18987	0.056592		0.15554	-0.01978	0.041474	-0.26355	-0.44593	0.189534		0.27052	-0.01845	-0.23009	-0.0449	0.04161	0.203556
0.260463	-0.10827	-0.15793	-0.08192	-0.11728	0.097249		-0.16661	1.09996	0.466979	0.640782	-0.21306	0.076313		0.055644	-0.02099	0.085876	-0.31174	-0.42565	0.078368		0.024784	0.056228	-0.22861	0.013138	0.003998	0.097454
0.510323	-0.01518	-0.11183	-0.06196	-0.0848	0.210345		-0.20941	0.690009	0.32832	0.669349	-0.19021	0.057463		0.064519	-0.146	0.048742	-0.47507	-0.50517	0.052677		0.230204	0.250936	-0.2642	0.009948	0.030464	0.129538
0.337921	-0.04155	-0.186	-0.08835	-0.08416	0.154211		-0.22708	0.846894	0.692748	0.852326	-0.19952	0.058568		0.134727	-0.07456	-0.0269	-0.38362	-0.48418	0.065631		-0.23717	0.068189	-0.22527	-0.00082	0.041503	0.090088
0.424699	-0.12822	-0.17367	-0.07445	-0.02144	0.213193		-0.23515	0.679558	0.356351	0.979473	-0.12978	0.184506		-0.02756	-0.03575	0.010047	-0.29148	-0.4506	0.026985		0.251773	0.043435	-0.24145	0.026141	-0.03688	0.073834
	UAS-CsChrimson/Gr5a-LexA;			UAS-CsChrimson/Gr5a-LexA;
	LexAop-GCaMP6m/ TH-GAL4			LexAop-GCaMP6m/+
failed				failed
pre	post			pre	post
1.23877	1.68206			1.13039	0.786086
0.866336	1.21621			0.493464	0.717479
0.720169	1.24112			0.952753	0.965801
0.76592	2.2016			0.574216	0.608078
0.594049	2.16144			0.81344	1.22228
0.68474	2.22401			0.926077	1.08646
