# Supplementary material for: Sexual failure decreases sweet taste perception in male Drosophila via dopaminergic signaling
Source: eLife. 2025 Jul 23;14:RP105094. doi: 10.7554/eLife.105094 (PMC12286605; doi:10.7554/eLife.105094)
Supplement: Figure 3—source data 1. [file elife-105094-fig3-data1.xlsx]

## Sheet: Figure3-B
100mM					200mM					400mM					1000mM
	naïve	failed	satisfied			naïve	failed	satisfied			naïve	failed	satisfied			naïve	failed	satisfied
	0.66251	0.684044	1.2173			1.10729	1.29091	1.9283			1.19016	1.27222	1.95013			1.78093	1.29027	0.742003
	0.815075	0.561934	0.651337			3.31485	1.57516	1.4534			2.12894	1.93713	1.24836			1.70647	1.98811	2.04968
	0.818702	0.369456	0.885032			1.61189	0.606967	1.73995			2.00981	1.28454	1.53876			1.72136	0.991233	1.39325
	0.64134	0.253232	0.449397			1.70317	0.815787	1.68454			0.7782	0.298363	2.39813			1.58928	0.977144	2.50257
	0.498033	0.325182	0.866667			2.84996	0.952424	1.121			1.40302	0.626983	1.72716			2.96479	2.16737	2.01981
	1.14081		0.638188			0.896306	0.703537	1.73688			0.813828	0.612917	1.32807			1.89759	2.11772	1.02773
	0.576804		0.591414			1.72003	0.643998	1.75193			1.71568	0.452864	1.32409			1.86684	1.82288	1.34493
	0.660997		0.585478			2.21236	0.756603	2.01194			1.97783	1.6315	1.28153			4.08049	2.92045	2.62018
			0.473979			1.80699	1.23042				1.51746	1.66274	1.25601			2.43348	1.4368	2.57865
						0.8011	0.867766				2.33716	0.65949	1.04104			1.31877	2.11659	1.81765
						1.23351					2.17116	1.37082	1.15453			1.59374	2.80581	2.10228
						2.96859					2.64559	1.2795				2.82473	2.17687	2.69862
						0.700075										1.30648	2.53237	0.688996
																2.29628	2.53237	1.37253
																2.64168	3.41438
																2.65748	2.5811
																0.870759	1.23868
																1.32197	1.47047

## Sheet: Figure3-C
	naïve														failed											satisfied
	0.102336	0.170473	-0.29112	-0.10533	0.210859	0.02943	0.047268	-0.02688	-0.06899	-0.0653	-0.0071	0.206265	-0.0194		0.072372	0.046903	0.049219	-0.01228	-0.00525	-0.040755	-0.120646	-0.08846	-0.04313	-0.0419		0.030738	-0.152802	-0.09186	-7.2e-05	-0.057072	0.017853	-0.07842	-0.13566
	0.041479	0.22133	0.04108	0.024703	0.052171	-0.11948	-0.05326	0.007371	-0.13441	-0.0832	0.062598	-0.04321	-0.02284		-0.01801	0.038225	-0.06574	-0.04282	0.054733	-0.01022	-0.01544	-0.09559	0.069584	-0.06456		0.029902	-0.06243	0.032366	-0.09448	-0.04017	-0.102	-0.05077	0.107767
	-0.05016	0.159735	-0.04585	0.017001	0.122472	0.035001	0.013132	-0.04368	-0.12206	-0.08504	0.044213	0.197001	0.005086		0.036523	-0.03638	-0.05424	-0.13209	-0.0008	0.027898	0.083452	-0.02628	0.101152	0.044562		0.033516	-0.01983	-0.02818	0.020535	-0.03852	-0.12184	-0.00526	-0.00569
	0.078797	0.169351	-0.15165	-0.2771	0.092258	-0.10404	0.092789	-0.05808	-0.08535	0.064991	0.000584	-0.04416	-0.02581		-0.00084	0.019311	0.154079	-0.09397	0.092308	0.024633	-0.03504	-0.06559	0.001055	0.003311		-0.1247	0.096899	0.211763	0.04411	-0.06767	-0.05549	0.051902	0.032197
	0.058726	0.299899	0.077308	-0.03279	0.140892	0.074492	0.028645	-0.1361	-0.08681	-0.12254	-0.011	0.009555	0.050177		0.026657	0.024711	-0.07556	0.079054	-0.03086	0.004032	-0.02795	-0.10009	0.076174	-0.04004		-0.09004	-0.02029	-0.03652	0.016645	-0.03831	-0.10196	-0.06075	-0.03466
	0.05446	0.230819	0.057718	0.06484	0.063103	0.014922	-0.00711	-0.01357	-0.06573	-0.00987	0.027637	0.05193	0.039131		0.086844	0.065388	0.021466	-0.03209	-0.04799	-0.01267	-0.01613	0.030251	-0.12968	-0.07643		0.212939	0.020381	0.021437	0.08433	-0.05075	-0.04564	-0.0726	-0.11499
	-0.05455	0.208764	-0.07592	-0.04784	0.099503	0.002598	-0.02138	0.064944	-0.07113	0.094919	0.03619	0.176727	-0.15545		-0.02647	-0.0161	0.115945	0.110669	0.005784	-0.00909	-0.05714	0.01286	-0.02368	0.007163		0.148292	-0.08097	0.075765	0.106359	-0.05216	-0.07815	0.047064	0.002489
	-0.05219	0.254011	0.069628	-0.17419	0.034984	-0.0473	0.032783	-0.1146	-0.11919	0.034828	0.043485	0.390262	-0.04762		-0.00653	-0.00903	-0.0121	-0.02794	-0.01709	-0.10149	0.02907	0.025035	-0.01513	0.015544		-0.09763	0.068889	-0.08789	-0.02246	-0.06085	-0.12018	0.045204	0.01501
	-0.01272	0.190508	-0.07973	-0.0325	0.107187	0.065466	0.005433	-0.05245	-0.08753	0.135313	0.016163	0.00727	-0.04549		-0.06028	-0.08797	-0.10347	0.009953	-0.05271	0.01746	-0.00444	0.07558	0.005705	0.02745		-0.0573	0.099578	-0.02984	-0.07904	-0.06932	0.129963	0.027889	0.050949
	0.060568	0.259364	0.02469	-0.17333	0.114547	-0.09087	-0.04642	-0.05955	-0.1016	-0.05352	-0.04312	0.141041	-0.09732		0.063319	0.08449	-0.06114	-0.01589	-0.06742	-0.05874	0.060035	0.015927	0.063685	-0.01472		-0.04266	0.081875	-0.00508	-0.07961	-0.05358	0.09476	0.113466	0.011348
	-0.00167	0.219423	0.00439	0.062636	0.093628	0.036205	0.027441	-0.19639	-0.10753	0.004337	0.015106	0.128952	-0.08624		0.007062	0.027344	-0.05956	0.061003	-0.01587	-0.05125	-0.03368	0.089334	-0.0438	0.020489		0.088006	-0.08831	-0.04457	0.012612	0.024204	0.083288	0.008374	-0.12128
	-0.06802	0.11234	0.042075	-0.15775	0.205203	-0.03072	0.163932	-0.094	-0.13358	-0.00485	0.001838	0.332392	0.009001		-0.01287	-0.08187	-0.01185	0.217221	-0.01829	0.058388	-0.02408	0.031546	-0.00245	0.009619		-0.00126	0.065017	0.204764	-0.03356	-0.02816	-0.04361	0.040925	0.021005
	0.028466	0.261416	-0.00283	0.019397	0.173825	-0.07315	0.109895	-0.01077	-0.04723	0.058655	0.004788	0.303934	-0.09522		0.029426	0.0152	0.137514	-0.07241	0.036532	-0.04755	0.060899	0.057301	0.066183	0.051033		-0.0161	0.030485	0.018087	-0.0032	-0.05621	-0.02062	-0.05509	0.0666
	-0.09825	0.158709	-0.05324	0.062764	0.143783	-0.0732	0.045412	0.024786	-0.08323	0.09276	-0.01435	0.271779	0.00948		-0.02685	-0.04219	-0.04731	0.044672	0.015286	-0.05243	0.041665	0.052979	0.122596	0.033791		-0.00018	0.077071	-0.02063	-0.02942	0.070775	-0.07334	-0.04079	-0.04284
	-0.01217	0.194643	0.238751	0.031661	0.737238	-0.00897	0.19764	-0.12138	-0.14713	0.074643	-0.05105	0.314611	0.463762		0.10675	0.011573	0.070011	-0.01353	0.036437	-0.0566	0.140198	0.080767	0.082498	0.045125		-0.13796	0.090377	-0.07189	0.02988	-0.15254	-0.06067	0.182548	0.005353
	1.10729	2.4621	1.61189	1.70317	2.65043	0.121092	1.72003	1.46044	0.468083	0.800162	1.03193	2.44061	0.700075		0.703537	0.49424	0.756603	1.29091	1.57516	0.302272	0.763042	0.76178	1.19383	0.867766		1.9283	0.548668	1.19323	1.68454	0.926089	0.309289	0.523718	1.31975
	0.628784	3.31485	1.28893	1.18371	2.84996	0.629121	1.51509	2.21236	0.552002	0.8011	1.22136	2.96859	0.605271		0.484103	0.643998	0.569043	0.903705	1.32889	0.606967	0.815787	0.952424	1.23042	0.644955		1.91366	1.4534	1.55021	1.47729	1.121	1.67453	1.73688	1.75193
	0.363841	2.58379	1.1774	0.749581	1.48323	0.896306	1.1539	1.81717	1.80699	0.388067	1.23351	2.52869	0.154258		0.456814	0.542789	0.209492	0.662528	0.936153	0.564667	0.702294	0.6179	0.614793	0.463084		0.744335	1.05206	1.63942	1.45983	0.937724	2.01194	1.5905	1.64527
	0.202476	1.06672	0.382098	0.184354	0.813472	0.691432	0.431558	1.06941	1.58224	0.202648	0.478212	1.76819	0.131936		0.149593	0.157784	0.165267	0.195931	0.429876	0.360484	0.601897	0.335315	0.345962	0.220092		0.221154	0.471772	1.73995	0.644447	0.248966	0.747417	1.10838	1.13934
	0.08205	0.637432	0.223677	0.041824	0.501856	0.220442	0.266086	0.802999	0.795334	0.150692	0.222099	0.919364	-0.03533		0.049038	-0.00114	0.085985	0.285174	0.152944	0.139218	0.385416	0.212258	0.284261	0.123351		0.250072	0.146047	0.826085	0.315792	0.229387	0.361058	0.62893	0.721184
	-0.13379	0.387828	0.158402	0.150676	0.309682	0.05985	0.095536	0.481607	0.398616	0.014897	0.12825	0.613103	0.044649		0.062809	-0.0679	0.02072	0.028848	0.135707	0.099083	0.267286	0.191086	0.096847	0.025549		0.199764	0.061581	0.212418	0.201562	0.050369	0.320885	0.350164	0.451123
	0.048077	0.426472	-0.0959	0.031328	0.271784	0.092031	0.14245	0.364107	0.177924	0.10321	0.078147	0.312118	-0.10728		0.113497	-0.01731	-0.04915	0.267562	0.092308	0.004973	0.394465	0.127844	0.008521	0.114676		-0.08723	0.037647	0.097698	-0.02224	-0.02328	0.136009	0.189066	0.235636
	-0.03887	0.230883	-0.15424	0.035262	0.167697	0.00233	0.035617	0.431329	0.007636	-0.00292	0.069323	0.348843	0.064649		0.026299	-0.03184	0.053694	0.20305	0.034282	0.03711	0.20622	0.053002	0.052764	0.025034		0.007138	-0.08368	0.11864	0.041765	-0.05698	-0.17353	0.124063	0.137622
	0.077385	0.165328	-0.07287	0.035339	0.164103	0.029318	0.021371	0.353089	0.051452	0.00806	0.01809	0.321133	0.060068		-0.00534	-0.10777	0.02389	0.175822	0.019948	-0.05572	0.201082	0.084984	0.226918	0.154132		-0.09593	0.033688	0.082521	-0.02681	-0.09283	-0.00712	0.043205	0.022806
	-0.13646	0.185331	0.135898	-0.04866	0.159483	0.046813	-0.0203	0.363722	-0.01555	0.086236	0.011198	0.111545	0.027606		-0.0157	-0.03332	-0.08442	0.050779	0.006729	-0.00664	0.22268	0.152942	0.041471	0.074225		0.138613	0.060096	0.031094	-0.02159	-0.05736	-0.16491	0.029628	-0.00147
	-0.07529	0.197016	0.133054	0.073426	0.069323	0.082381	0.052798	0.044405	-0.02843	-0.01875	0.044188	0.324415	-0.02728		0.128613	0.004641	0.00804	0.106316	0.017726	0.045731	0.078177	0.176123	0.004934	0.046015		-0.22642	0.08007	-0.05799	0.0294	0.064189	-0.03271	-0.05611	0.029834
	0.058726	0.144556	-0.08293	-0.11128	0.154196	0.039837	0.041474	0.442091	-0.10167	-0.01275	0.058602	0.381123	0.052488		-0.01177	0.051014	-0.00377	0.106856	0.029828	-0.08818	0.066128	0.17229	0.162534	0.016262		-6.2e-05	0.159674	-0.07375	-0.01123	-0.13922	-0.06639	0.019251	-0.23157
	0.028589	0.169544	-0.07589	-0.00777	0.229197	0.076943	0.037172	0.26107	-0.02292	0.146452	0.00815	0.287981	0.065023		0.066883	0.000907	-0.00806	-0.05864	0.057163	-0.01558	0.107778	0.150799	-0.10202	0.052453		-0.13969	-0.03966	-0.01567	0.017995	-0.02848	0.089128	-0.05319	-0.15654
	-0.01097	0.218108	0.149266	0.058445	0.24939	0.041219	0.07053	0.030349	-0.07927	0.06133	0.049788	0.232437	0.026835		0.048552	0.029466	0.062614	0.033167	0.094624	-0.05452	0.156976	0.193473	-0.03625	-0.01152		-0.06964	-0.01639	-0.02404	0.009557	0.013277	0.015285	-0.01422	-0.00773
	-0.09131	0.158981	0.066784	-0.05339	0.152008	0.084855	0.045863	0.115308	-0.14953	0.038113	0.030645	0.28096	0.105835		-0.02796	0.026887	0.024232	-0.07787	0.050856	0.034712	0.125557	0.232384	0.174332	-0.02721		-0.13659	0.051507	-0.01783	0.007887	-0.11941	-0.1066	-0.02774	-0.27419
	-0.02499	0.195317	-0.14635	-0.06885	0.153574	0.078548	0.056748	0.011329	-0.1035	-0.10746	0.029913	0.336588	-0.07745		0.063796	-0.02717	-0.01347	0.032998	-0.0256	0.029366	0.324941	0.170942	-0.07154	0.06116		-0.02602	0.113641	-0.0107	0.01819	0.015049	0.055582	0.031868	-0.19481

## Sheet: Figure3-F
	naive	failed	satisfied
	1.01939	0.770119	2.00621
	0.523538	0.336342	1.50348
	1.87628	0.978007	1.7318
	0.719741	0.117791	1.2319
	1.50225	0.459879	1.0049
	0.728942	0.98687	0.940886
	1.57987	0.591495	0.588613
	0.722012	0.695596	1.02781
	0.527061	0.787379	1.04
	0.631385	0.756855	0.853615
	1.14244	0.46461	1.39463
	0.717602	0.489267	1.10961
	1.20194	0.620677	1.62459
	0.708945	0.866877	2.12043
	1.26054	0.900447	0.571704
	2.20134	0.417891	1.33893
	0.864069	0.549324	1.44732
	0.623512	0.856674	0.5236
	1.06931	0.538761	1.0794
	0.670476	0.465789	1.23272
	0.782686	0.708364	1.08817
	0.944542	0.989589	1.42908
	0.982134	0.752852
		0.318777
		0.777882
		0.918941
		0.499478
		1.20346
		0.663822
		0.877312

## Sheet: Figure3-H
	naive	failed	satisfied
	0.691357	0.333254	1.32397
	0.75893	0.600337	2.54091
	2.09972	0.73618	1.26849
	0.606068	0.270253	0.883051
	1.05397	0.427762	1.44981
	1.06248	0.497913	1.42446
	1.14543	1.18264	1.90834
	0.491652	0.264243	2.74589
	0.835665	0.301657	0.856382
	1.09259	0.447586	0.706621
	0.736162	0.855238	1.17226
	1.11824	0.690924	1.32886
	1.30772	0.645264

## Sheet: Figure3-I
	naive	failed	satisfied
	1.34824	1.03709	2.21627
	0.381888	1.1923	1.16926
	1.69081	1.06009	0.988866
	1.63492	1.24179	0.308358
	0.845035	0.692753	1.09655
	0.859378	0.798941	0.719628
	1.05463	1.43868	1.29676
	0.373734	1.389	1.24822
	0.748991	0.976382	0.51625
	1.18609	0.730621	0.837778
	0.784238	1.00696	1.14654
	1.26606	0.880102	0.823137
	0.825975	0.732484
