# Supplementary material for: Sexual failure decreases sweet taste perception in male Drosophila via dopaminergic signaling
Source: eLife. 2025 Jul 23;14:RP105094. doi: 10.7554/eLife.105094 (PMC12286605; doi:10.7554/eLife.105094)
Supplement: Figure 4—figure supplement 1—source data 1. [file elife-105094-fig4-figsupp1-data1.xlsx]

## Sheet: Figure4-supplement1-A
elav-GAL4/UAS-Dop1R1 RNAi
naïve	sucrose	group1	group2	group3	group4		mean (%)	SEM (%)	number			group1	group2	group3	group4
	6.25mM	0	0	0	0		0	0	4		αS:	2.88744	2.29419	1.75707	1.69954
	12.5mM	0	0	0	0		0	0	4		MAT	407.185	459.264	422.984	438.606
	25mM	0	0	0	0		0	0	4
	50mM	0	0	0	0		0	0	4
	100mM	0	0	0	0		0	0	4
	200mM	0	0	0.1	0.166667		6.66667	4.08249	4
	400mM	0.5	0.416667	0.5	0.416667		45.8333	2.40562	4
	800mM	0.9	0.833333	0.8	0.833333		84.1667	2.09718	4
elav-GAL4/UAS-Dop1R1 RNAi
failed	sucrose	group1	group2	group3	group4		mean (%)	SEM (%)	number			group1	group2	group3	group4
	6.25mM	0	0	0	0		0	0	4		αS:	1.80624	3.22837	1.32774	2.75326
	12.5mM	0	0	0	0		0	0	4		MAT	741.08	565.878	638.642	530.587
	25mM	0	0	0	0		0	0	4
	50mM	0	0	0	0		0	0	4
	100mM	0	0	0	0		0	0	4
	200mM	0	0	0.1	0		2.5	2.5	4
	400mM	0.181818	0.166667	0.3	0.25		22.4621	3.09796	4
	800mM	0.545455	0.833333	0.6	0.833333		70.303	7.60498	4
elav-GAL4/UAS-Dop1R1 RNAi
satisfied	sucrose	group1	group2	group3	group4		mean (%)	SEM (%)	number			group1	group2	group3	group4
	6.25mM	0	0	0	0		0	0	4		αS:	3.18933	1.99708	1.38098	2.75326
	12.5mM	0	0	0	0		0	0	4		MAT	410.686	452.388	673.138	530.587
	25mM	0	0	0	0		0	0	4
	50mM	0	0	0	0		0	0	4
	100mM	0	0	0	0		0	0	4
	200mM	0.090909	0.083333	0	0		4.35605	2.51972	4
	400mM	0.454545	0.416667	0.333333	0.25		36.3636	4.55596	4
	800mM	1	0.833333	0.555556	0.833333		80.5556	9.21283	4
elav-GAL4/+
naïve	sucrose	group1	group2	group3	group4		mean (%)	SEM (%)	number			group1	group2	group3	group4
	6.25mM	0	0	0	0		0	0	4		αS:	1.60855	1.28942	2.01209	1.21356
	12.5mM	0	0	0	0		0	0	4		MAT	283.236	284.708	282.896	209.667
	25mM	0	0	0	0		0	0	4
	50mM	0	0	0	0		0	0	4
	100mM	0	0.1	0	0.2		7.5	4.78714	4
	200mM	0.4	0.4	0.3	0.6		42.5	6.29153	4
	400mM	0.6	0.6	0.7	0.6		62.5	2.5	4
	800mM	1	0.9	1	1		97.5	2.5	4
elav-GAL4/+
failed	sucrose	group1	group2	group3	group4		mean (%)	SEM (%)	number			group1	group2	group3	group4
	6.25mM	0	0	0	0		0	0	4		αS:	1.40501	1.21501	1.56032	1.637
	12.5mM	0	0	0	0		0	0	4		MAT	596.524	584.784	362.218	477.512
	25mM	0	0	0	0		0	0	4
	50mM	0	0	0	0		0	0	4
	100mM	0	0	0	0		0	0	4
	200mM	0	0.1	0.2	0		7.5	4.78714	4
	400mM	0.4	0.4	0.6	0.5		47.5	4.78714	4
	800mM	0.6	0.6	0.8	0.7		67.5	4.78714	4
elav-GAL4/+
satisfied	sucrose	group1	group2	group3	group4		mean (%)	SEM (%)	number			group1	group2	group3	group4
	6.25mM	0	0	0	0		0	0	4		αS:	1.37406	1.41103	2.11735	2.19635
	12.5mM	0	0	0	0		0	0	4		MAT	339.504	238.362	216.052	264.661
	25mM	0	0	0	0		0	0	4
	50mM	0	0	0	0		0	0	4
	100mM	0	0.2	0	0		5	5	4
	200mM	0.3	0.4	0.5	0.3		37.5	4.78714	4
	400mM	0.6	0.7	0.8	0.8		72.5	4.78714	4
	800mM	0.8	1	1	0.9		92.5	4.78714	4
+/UAS-Dop1R1 RNAi
naïve	sucrose	group1	group2	group3	group4		mean (%)	SEM (%)	number			group1	group2	group3	group4
	6.25mM	0	0	0	0		0	0	4		αS:	2.7982	1.41741	1.81428	1.28746
	12.5mM	0	0	0	0		0	0	4		MAT	566.289	280.173	468.39	394.878
	25mM	0	0	0	0		0	0	4
	50mM	0	0	0	0		0	0	4
	100mM	0	0	0	0		0	0	4
	200mM	0	0.4	0.1	0.2		17.5	8.53913	4
	400mM	0.2	0.7	0.4	0.6		47.5	11.0868	4
	800mM	0.8	0.8	0.8	0.7		77.5	2.5	4
+/UAS-Dop1R1 RNAi
failed	sucrose	group1	group2	group3	group4		mean (%)	SEM (%)	number			group1	group2	group3	group4
	6.25mM	0	0	0	0		0	0	4		αS:	2.29129	1.89794	2.37484	1.49943
	12.5mM	0	0	0	0		0	0	4		MAT	616.741	573.045	714.603	1177.59
	25mM	0	0	0	0		0	0	4
	50mM	0	0	0	0		0	0	4
	100mM	0	0	0	0		0	0	4
	200mM	0	0	0.1	0		2.5	2.5	4
	400mM	0.2	0.3	0.1	0.1		17.5	4.78714	4
	800mM	0.7	0.7	0.6	0.3		57.5	9.46485	4
+/UAS-Dop1R1 RNAi
satisfied	sucrose	group1	group2	group3	group4		mean (%)	SEM (%)	number			group1	group2	group3	group4
	6.25mM	0	0	0	0		0	0	4		αS:	4.78484	1.08113	2.12157	2.88878
	12.5mM	0	0	0	0		0	0	4		MAT	354.599	344.161	407.599	392.979
	25mM	0	0	0	0		0	0	4
	50mM	0	0	0	0		0	0	4
	100mM	0	0	0.1	0		2.5	2.5	4
	200mM	0	0.4	0.2	0.1		17.5	8.53913	4
	400mM	0.7	0.6	0.4	0.5		55	6.45497	4
	800mM	0.9	0.7	1	1		90	7.07107	4

## Sheet: Figure4-supplement1-B
elav-GAL4/UAS-Dop2R RNAi
naïve	sucrose	group1	group2	group3	group4	group5		mean (%)	SEM (%)	number			group1	group2	group3	group4	group5
	6.25mM	0	0	0	0	0		0	0	5		αS:	1.48217	3.10999	2.14251	2.38803	4.55047
	12.5mM	0	0	0	0	0		0	0	5		MAT	280.808	330	496.077	306.728	457.912
	25mM	0	0	0	0	0		0	0	5
	50mM	0.1	0	0	0	0		2	2	5
	100mM	0.1	0	0.142857	0	0.142857		7.71428	3.24509	5
	200mM	0.3	0.1	0.142857	0.2	0.142857		17.7143	3.45821	5
	400mM	0.7	0.7	0.285714	0.7	0.285714		53.4286	10.1479	5
	800mM	0.9	1	0.857143	1	1		95.1429	3.05059	5
elav-GAL4/UAS-Dop2R RNAi
failed	sucrose	group1	group2	group3	group4	group5		mean (%)	SEM (%)	number			group1	group2	group3	group4	group5
	6.25mM	0	0	0	0	0		0	0	5		αS:	1.28727	1.97672	2.21478	1.77942	1.83504
	12.5mM	0	0	0	0	0		0	0	5		MAT	316.981	400.583	400.222	381.129	423.596
	25mM	0	0	0	0	0		0	0	5
	50mM	0	0	0	0	0		0	0	5
	100mM	0.111111	0	0	0	0		2.22222	2.22222	5
	200mM	0.333333	0.125	0.1	0.2	0.2		19.1667	4.06543	5
	400mM	0.555556	0.5	0.5	0.5	0.4		49.1111	2.51907	5
	800mM	0.888889	0.875	0.9	0.9	0.9		89.2778	0.493788	5
elav-GAL4/UAS-Dop2R RNAi
satisfied	sucrose	group1	group2	group3	group4	group5		mean (%)	SEM (%)	number			group1	group2	group3	group4	group5
	6.25mM	0	0	0	0	0		0	0	5		αS:	1.88829	3.44582	9.99999	2.97385	2.38803
	12.5mM	0	0	0	0	0		0	0	5		MAT	307.587	306.082	220.172	244.083	306.728
	25mM	0	0	0	0	0		0	0	5
	50mM	0	0	0	0	0		0	0	5
	100mM	0.1	0	0	0	0		2	2	5
	200mM	0.2	0.1	0.2	0.3	0.2		20	3.16228	5
	400mM	0.7	0.8	1	0.9	0.7		82	5.83095	5
	800mM	0.9	0.9	1	0.9	1		94	2.44949	5
elav-GAL4/+
naïve	sucrose	group1	group2	group3	group4			mean (%)	SEM (%)	number			group1	group2	group3	group4
	6.25mM	0	0	0	0			0	0	4		αS:	2.38883	2.08282	2.77967	2.84979
	12.5mM	0	0	0	0			0	0	4		MAT	260.831	198.8	241.979	223.091
	25mM	0	0	0	0			0	0	4
	50mM	0	0.1	0	0			2.5	2.5	4
	100mM	0	0.1	0.1	0			5	2.88675	4
	200mM	0.3	0.5	0.3	0.4			37.5	4.78714	4
	400mM	0.8	0.9	0.9	0.9			87.5	2.5	4
	800mM	1	1	1	1			100	0	4
elav-GAL4/+
failed	sucrose	group1	group2	group3	group4			mean (%)	SEM (%)	number			group1	group2	group3	group4
	6.25mM	0	0	0	0			0	0	4		αS:	9.98379	1.83504	1.29603	1.80615
	12.5mM	0	0	0	0			0	0	4		MAT	411.42	423.596	379.664	309.58
	25mM	0	0	0	0			0	0	4
	50mM	0	0	0	0			0	0	4
	100mM	0	0	0	0			0	0	4
	200mM	0	0.2	0.3	0.3			20	7.07107	4
	400mM	0.4	0.4	0.5	0.6			47.5	4.78714	4
	800mM	1	0.9	0.8	1			92.5	4.78714	4
elav-GAL4/+
satisfied	sucrose	group1	group2	group3	group4			mean (%)	SEM (%)	number			group1	group2	group3	group4
	6.25mM	0	0	0	0			0	0	4		αS:	1.61153	1.55306	2.16436	2.35516
	12.5mM	0	0	0	0			0	0	4		MAT	250.38	200.077	238.5	220.803
	25mM	0	0	0	0			0	0	4
	50mM	0	0	0	0			0	0	4
	100mM	0.1	0.2	0	0.1			10	4.08248	4
	200mM	0.4	0.5	0.4	0.4			42.5	2.5	4
	400mM	0.7	0.8	0.8	0.9			80	4.08248	4
	800mM	1	1	1	1			100	0	4
+/UAS-Dop2R RNAi
naïve	sucrose	group1	group2	group3	group4			mean (%)	SEM (%)	number			group1	group2	group3	group4
	6.25mM	0	0	0	0			0	0	4		αS:	1.53656	2.84979	1.91766	1.3655
	12.5mM	0	0	0	0			0	0	4		MAT	320.166	223.091	294.881	186.905
	25mM	0	0	0	0			0	0	4
	50mM	0	0	0	0			0	0	4
	100mM	0.1	0	0.2	0.3			15	6.45497	4
	200mM	0.2	0.4	0.2	0.5			32.5	7.5	4
	400mM	0.7	0.9	0.7	0.8			77.5	4.78714	4
	800mM	0.8	1	1	1			95	5	4
+/UAS-Dop2R RNAi
failed	sucrose	group1	group2	group3	group4			mean (%)	SEM (%)	number			group1	group2	group3	group4
	6.25mM	0	0	0	0			0	0	4		αS:	1.09599	2.34922	1.7315	0.808306
	12.5mM	0	0	0	0			0	0	4		MAT	835.933	321.062	815.473	1135.33
	25mM	0	0	0	0			0	0	4
	50mM	0	0	0	0			0	0	4
	100mM	0.1	0	0.1	0			5	2.88675	4
	200mM	0.1	0.142857	0.1	0.2			13.5714	2.36902	4
	400mM	0.2	0.714286	0.1	0.2			30.3572	13.8919	4
	800mM	0.5	0.857143	0.5	0.4			56.4286	10.0424	4
+/UAS-Dop2R RNAi
satisfied	sucrose	group1	group2	group3	group4			mean (%)	SEM (%)	number			group1	group2	group3	group4
	6.25mM	0	0	0	0			0	0	4		αS:	1.90065	2.66514	1.37976	1.79971
	12.5mM	0	0	0	0			0	0	4		MAT	318.435	115.811	149.394	290.15
	25mM	0	0	0	0			0	0	4
	50mM	0	0	0	0			0	0	4
	100mM	0	0.375	0.4	0			19.375	11.1978	4
	200mM	0.222222	0.875	0.6	0.3			49.9306	14.9383	4
	400mM	0.666667	1	0.9	0.7			81.6667	7.99305	4
	800mM	0.888889	1	0.9	0.9			92.2222	2.60579	4

## Sheet: Figure4-supplement1-C
elav-GAL4/UAS-Dop1R2 RNAi
naïve	sucrose	group1	group2	group3	group4	group5			mean (%)	SEM (%)	number			group1	group2	group3	group4	group5
	6.25mM	0	0	0	0	0			0	0	5		αS:	9.99997	9.53304	2.09256	2.18084	2.7982
	12.5mM	0	0	0	0	0			0	0	5		MAT	715.552	760.68	569.918	447.684	566.289
	25mM	0	0	0	0	0			0	0	5
	50mM	0	0	0	0	0			0	0	5
	100mM	0	0	0	0	0			0	0	5
	200mM	0	0	0	0	0			0	0	5
	400mM	0	0	0.272727	0.454545	0.2			18.5454	8.63205	5
	800mM	0.833333	0.666667	0.727273	0.818182	0.8			76.9091	3.141	5
elav-GAL4/UAS-Dop1R2 RNAi
failed	sucrose	group1	group2	group3	group4	group5			mean (%)	SEM (%)	number			group1	group2	group3	group4	group5
	6.25mM	0	0	0	0	0			0	0	5		αS:	9.60277	9.84632	1.81975	9.6859	1.49943
	12.5mM	0	0	0	0	0			0	0	5		MAT	841.044	800	988.453	858.17	1177.59
	25mM	0	0	0	0	0			0	0	5
	50mM	0	0	0	0	0			0	0	5
	100mM	0	0	0	0	0			0	0	5
	200mM	0	0	0	0	0			0	0	5
	400mM	0	0	0.090909	0	0.1			3.81818	2.34256	5
	800mM	0.333333	0.5	0.363636	0.272727	0.3			35.3939	3.95962	5
elav-GAL4/UAS-Dop1R2 RNAi
satisfied	sucrose	group1	group2	group3	group4	group5			mean (%)	SEM (%)	number			group1	group2	group3	group4	group5
	6.25mM	0	0	0	0	0			0	0	5		αS:	1.73578	4.01091	1.75178	1.4781	2.7982
	12.5mM	0	0	0	0	0			0	0	5		MAT	795.052	528.389	627.6	711.242	566.289
	25mM	0	0	0	0	0			0	0	5
	50mM	0	0	0	0	0			0	0	5
	100mM	0	0	0	0	0			0	0	5
	200mM	0	0	0	0	0			0	0	5
	400mM	0.166667	0.166667	0.272727	0.272727	0.2			21.5758	2.40407	5
	800mM	0.5	0.916667	0.636364	0.545455	0.8			67.9697	7.83637	5
elav-GAL4/+
naïve	sucrose	group1	group2	group3	group4				mean (%)	SEM (%)	number			group1	group2	group3	group4
	6.25mM	0	0	0	0				0	0	4		αS:	2.38883	2.08282	2.77967	2.84979
	12.5mM	0	0	0	0				0	0	4		MAT	260.831	198.8	241.979	223.091
	25mM	0	0	0	0				0	0	4
	50mM	0	0.1	0	0				2.5	2.5	4
	100mM	0	0.1	0.1	0				5	2.88675	4
	200mM	0.3	0.5	0.3	0.4				37.5	4.78714	4
	400mM	0.8	0.9	0.9	0.9				87.5	2.5	4
	800mM	1	1	1	1				100	0	4
elav-GAL4/+
failed	sucrose	group1	group2	group3	group4				mean (%)	SEM (%)	number			group1	group2	group3	group4
	6.25mM	0	0	0	0				0	0	4		αS:	9.98379	1.83504	1.29603	1.80615
	12.5mM	0	0	0	0				0	0	4		MAT	411.42	423.596	379.664	309.58
	25mM	0	0	0	0				0	0	4
	50mM	0	0	0	0				0	0	4
	100mM	0	0	0	0				0	0	4
	200mM	0	0.2	0.3	0.3				20	7.07107	4
	400mM	0.4	0.4	0.5	0.6				47.5	4.78714	4
	800mM	1	0.9	0.8	1				92.5	4.78714	4
elav-GAL4/+
satisfied	sucrose	group1	group2	group3	group4				mean (%)	SEM (%)	number			group1	group2	group3	group4
	6.25mM	0	0	0	0				0	0	4		αS:	1.61153	1.55306	2.16436	2.35516
	12.5mM	0	0	0	0				0	0	4		MAT	250.38	200.077	238.5	220.803
	25mM	0	0	0	0				0	0	4
	50mM	0	0	0	0				0	0	4
	100mM	0.1	0.2	0	0.1				10	4.08248	4
	200mM	0.4	0.5	0.4	0.4				42.5	2.5	4
	400mM	0.7	0.8	0.8	0.9				80	4.08248	4
	800mM	1	1	1	1				100	0	4
+/UAS-Dop1R2 RNAi
naïve	sucrose	group1	group2	group3	group4	group5	group6		mean (%)	SEM (%)	number			group1	group2	group3	group4	group5	group6
	6.25mM	0	0	0	0	0	0		0	0	6		αS:	2.12438	1.77318	1.637	1.21501	1.56032	1.637
	12.5mM	0	0	0	0	0	0		0	0	6		MAT	478.785	323.631	477.512	584.784	362.218	477.512
	25mM	0	0	0	0	0	0		0	0	6
	50mM	0	0	0	0	0	0		0	0	6
	100mM	0	0	0	0	0	0		0	0	6
	200mM	0	0.2	0	0.1	0.2	0		8.33333	4.01386	6
	400mM	0.4	0.7	0.5	0.4	0.6	0.5		51.6667	4.77261	6
	800mM	0.8	0.8	0.7	0.6	0.8	0.7		73.3333	3.33333	6
+/UAS-Dop1R2 RNAi
failed	sucrose	group1	group2	group3	group4	group5	group6		mean (%)	SEM (%)	number			group1	group2	group3	group4	group5	group6
	6.25mM	0	0	0	0	0	0		0	0	6		αS:	1.56712	1.40501	1.29374	1.07549	1.29731	1.07549
	12.5mM	0	0	0	0	0	0		0	0	6		MAT	645.208	596.524	1314.38	950.99	968.557	950.99
	25mM	0	0	0	0	0	0		0	0	6
	50mM	0	0	0	0	0	0		0	0	6
	100mM	0	0	0	0	0	0		0	0	6
	200mM	0	0	0	0	0	0		0	0	6
	400mM	0.3	0.4	0.1	0.3	0.2	0.3		26.6667	4.21637	6
	800mM	0.6	0.6	0.2	0.4	0.4	0.4		43.3333	6.14636	6
+/UAS-Dop1R2 RNAi
satisfied	sucrose	group1	group2	group3	group4	group5	group6		mean (%)	SEM (%)	number			group1	group2	group3	group4	group5	group6
	6.25mM	0	0	0	0	0	0		0	0	6		αS:	1.70451	1.48761	1.58012	1.89794	1.24284	1.85094
	12.5mM	0	0	0	0	0	0		0	0	6		MAT	526.329	404.087	789.691	573.045	443.399	379.401
	25mM	0	0	0	0	0	0		0	0	6
	50mM	0	0	0	0	0	0		0	0	6
	100mM	0	0	0	0	0	0		0	0	6
	200mM	0	0.2	0	0	0.2	0.1		8.33333	4.01386	6
	400mM	0.4	0.5	0.2	0.3	0.5	0.6		41.6667	6.00925	6
	800mM	0.7	0.8	0.5	0.7	0.7	0.8		70	4.47214	6

## Sheet: Figure4-supplement1-D
elav-GAL4/UAS-DopEcR RNAi
naïve	sucrose	group1	group2	group3	group4			mean (%)	SEM (%)	number			group1	group2	group3	group4
	6.25mM	0	0	0	0			0	0	4		αS:	2.0386	2.34541	1.93381	1.89801
	12.5mM	0	0	0	0			0	0	4		MAT	386.438	386.095	510.659	366.404
	25mM	0	0	0	0			0	0	4
	50mM	0	0	0	0			0	0	4
	100mM	0	0	0	0			0	0	4
	200mM	0.222222	0	0.181818	0.181818			14.6464	4.97417	4
	400mM	0.444444	0.6	0.272727	0.545455			46.5656	7.19304	4
	800mM	1	0.8	0.818182	0.909091			88.1818	4.60566	4
elav-GAL4/UAS-DopEcR RNAi
failed	sucrose	group1	group2	group3	group4			mean (%)	SEM (%)	number			group1	group2	group3	group4
	6.25mM	0	0	0	0			0	0	4		αS:	1.9335	2.72944	2.72944	1.89794
	12.5mM	0	0	0	0			0	0	4		MAT	616.026	604.534	604.534	573.045
	25mM	0	0	0	0			0	0	4
	50mM	0	0	0	0			0	0	4
	100mM	0	0	0	0			0	0	4
	200mM	0	0	0	0			0	0	4
	400mM	0.25	0.166667	0.166667	0.3			22.0834	3.28964	4
	800mM	0.666667	0.75	0.75	0.7			71.6667	2.04123	4
elav-GAL4/UAS-DopEcR RNAi
satisfied	sucrose	group1	group2	group3	group4			mean (%)	SEM (%)	number			group1	group2	group3	group4
	6.25mM	0	0	0	0			0	0	4		αS:	2.16724	1.81193	1.45442	2.88714
	12.5mM	0	0	0	0			0	0	4		MAT	279.241	506.594	418.877	336.358
	25mM	0	0	0	0			0	0	4
	50mM	0	0	0	0			0	0	4
	100mM	0.083333	0	0	0			2.08333	2.08333	4
	200mM	0.25	0.111111	0.25	0.111111			18.0555	4.00938	4
	400mM	0.75	0.333333	0.416667	0.666667			54.1667	9.91866	4
	800mM	1	0.777778	0.833333	1			90.2778	5.72653	4
elav-GAL4/+
naïve	sucrose	group1	group2	group3	group4			mean (%)	SEM (%)	number			group1	group2	group3	group4
	6.25mM	0	0	0	0			0	0	4		αS:	2.38883	2.08282	2.77967	2.84979
	12.5mM	0	0	0	0			0	0	4		MAT	260.831	198.8	241.979	223.091
	25mM	0	0	0	0			0	0	4
	50mM	0	0.1	0	0			2.5	2.5	4
	100mM	0	0.1	0.1	0			5	2.88675	4
	200mM	0.3	0.5	0.3	0.4			37.5	4.78714	4
	400mM	0.8	0.9	0.9	0.9			87.5	2.5	4
	800mM	1	1	1	1			100	0	4
elav-GAL4/+
failed	sucrose	group1	group2	group3	group4			mean (%)	SEM (%)	number			group1	group2	group3	group4
	6.25mM	0	0	0	0			0	0	4		αS:	9.98379	1.83504	1.29603	1.80615
	12.5mM	0	0	0	0			0	0	4		MAT	411.42	423.596	379.664	309.58
	25mM	0	0	0	0			0	0	4
	50mM	0	0	0	0			0	0	4
	100mM	0	0	0	0			0	0	4
	200mM	0	0.2	0.3	0.3			20	7.07107	4
	400mM	0.4	0.4	0.5	0.6			47.5	4.78714	4
	800mM	1	0.9	0.8	1			92.5	4.78714	4
elav-GAL4/+
satisfied	sucrose	group1	group2	group3	group4			mean (%)	SEM (%)	number			group1	group2	group3	group4
	6.25mM	0	0	0	0			0	0	4		αS:	1.61153	1.55306	2.16436	2.35516
	12.5mM	0	0	0	0			0	0	4		MAT	250.38	200.077	238.5	220.803
	25mM	0	0	0	0			0	0	4
	50mM	0	0	0	0			0	0	4
	100mM	0.1	0.2	0	0.1			10	4.08248	4
	200mM	0.4	0.5	0.4	0.4			42.5	2.5	4
	400mM	0.7	0.8	0.8	0.9			80	4.08248	4
	800mM	1	1	1	1			100	0	4
+/UAS-DopEcR RNAi
naïve	sucrose	group1	group2	group3	group4	group5		mean (%)	SEM (%)	number			group1	group2	group3	group4	group5
	6.25mM	0	0	0	0	0		0	0	5		αS:	1.637	1.62973	1.70451	1.44709	1.5563
	12.5mM	0	0	0	0	0		0	0	5		MAT	477.512	266.778	526.329	221.922	242.918
	25mM	0	0	0	0	0		0	0	5
	50mM	0	0	0	0	0		0	0	5
	100mM	0	0	0	0.1	0		2	2	5
	200mM	0	0.4	0	0.5	0.5		28	11.5758	5
	400mM	0.5	0.7	0.4	0.8	0.7		62	7.34847	5
	800mM	0.7	0.9	0.7	0.8	0.9		80	4.47214	5
+/UAS-DopEcR RNAi
failed	sucrose	group1	group2	group3	group4	group5		mean (%)	SEM (%)	number			group1	group2	group3	group4	group5
	6.25mM	0	0	0	0	0		0	0	5		αS:	1.89794	1.21501	2.23289	2.08609	1.16914
	12.5mM	0	0	0	0	0		0	0	5		MAT	573.045	584.784	799.478	433.455	705.535
	25mM	0	0	0	0	0		0	0	5
	50mM	0	0	0	0	0		0	0	5
	100mM	0	0	0	0	0		0	0	5
	200mM	0	0.1	0	0	0		2	2	5
	400mM	0.3	0.4	0.1	0.5	0.4		34	6.78233	5
	800mM	0.7	0.6	0.5	0.8	0.5		62	5.83095	5
+/UAS-DopEcR RNAi
satisfied	sucrose	group1	group2	group3	group4	group5		mean (%)	SEM (%)	number			group1	group2	group3	group4	group5
	6.25mM	0	0	0	0	0		0	0	5		αS:	1.43941	1.59749	1.85094	1.53656	2.19635
	12.5mM	0	0	0	0	0		0	0	5		MAT	295.265	320.571	379.401	320.166	264.661
	25mM	0	0	0	0	0		0	0	5
	50mM	0	0	0	0	0		0	0	5
	100mM	0	0	0	0.1	0		2	2	5
	200mM	0.4	0.3	0.1	0.2	0.3		26	5.09902	5
	400mM	0.6	0.6	0.6	0.7	0.8		66	4	5
	800mM	0.9	0.9	0.8	0.8	0.9		86	2.44949	5
