# Supplementary material for: Sexual failure decreases sweet taste perception in male Drosophila via dopaminergic signaling
Source: eLife. 2025 Jul 23;14:RP105094. doi: 10.7554/eLife.105094 (PMC12286605; doi:10.7554/eLife.105094)
Supplement: Figure 4—source data 1. [file elife-105094-fig4-data1.xlsx]

## Sheet: Figure4-A
naïve	sucrose	group1	group2	group3	group4		mean (%)	SEM (%)	number
	6.25mM	0	0	0	0		0	0	4
	12.5mM	0	0	0	0		0	0	4
	25mM	0.25	0	0	0		6.25	6.25	4
	50mM	0.25	0.2	0	0		11.25	6.57489	4
	100mM	0.375	0.6	0.25	0.2		35.625	8.91949	4
	200mM	0.5	0.8	0.75	0.4		61.25	9.65553	4
	400mM	0.625	0.8	0.875	0.6		72.5	6.69266	4
	800mM	1	1	1	1		100	0	4
failed	sucrose	group1	group2	group3	group4		mean (%)	SEM (%)	number
	6.25mM	0	0	0	0		0	0	4
	12.5mM	0	0	0	0		0	0	4
	25mM	0	0	0	0		0	0	4
	50mM	0	0	0	0		0	0	4
	100mM	0	0	0	0		0	0	4
	200mM	0.375	0	0.25	0		15.625	9.375	4
	400mM	0.375	0.375	0.75	0.2		42.5	11.592	4
	800mM	0.625	0.625	0.75	0.4		60	7.28869	4
satisfied	sucrose	group1	group2	group3	group4		mean (%)	SEM (%)	number
	6.25mM	0	0	0	0		0	0	4
	12.5mM	0	0	0	0		0	0	4
	25mM	0	0	0	0		0	0	4
	50mM	0	0.142857	0	0		3.57143	3.57143	4
	100mM	0	0.571429	0	0.2		19.2857	13.4708	4
	200mM	0.4	0.714286	0.222222	0.4		43.4127	10.2356	4
	400mM	0.6	0.714286	0.888889	1		80.0794	8.90906	4
	800mM	0.8	0.857143	1	1		91.4286	5.08432	4

## Sheet: Figure4-B
naïve	sucrose	group1	group2	group3	group4		mean (%)	SEM (%)	number
	6.25mM	0	0	0	0		0	0	4
	12.5mM	0	0	0	0		0	0	4
	25mM	0	0	0	0		0	0	4
	50mM	0	0	0	0		0	0	4
	100mM	0	0	0	0		0	0	4
	200mM	0.214286	0	0	0		5.35715	5.35715	4
	400mM	0.214286	0.25	0.333333	0.2		24.9405	2.98865	4
	800mM	0.571429	0.5	0.5	0.5		51.7857	1.78572	4
failed	sucrose	group1	group2	group3	group4		mean (%)	SEM (%)	number
	6.25mM	0	0	0	0		0	0	4
	12.5mM	0	0	0	0		0	0	4
	25mM	0	0	0	0		0	0	4
	50mM	0	0	0	0		0	0	4
	100mM	0	0	0	0		0	0	4
	200mM	0	0	0	0		0	0	4
	400mM	0	0.166667	0.25	0.2		15.4167	5.41667	4
	800mM	0.363636	0.5	0.666667	0.5		50.7576	6.20104	4
satisfied	sucrose	group1	group2	group3	group4		mean (%)	SEM (%)	number
	6.25mM	0	0	0	0		0	0	4
	12.5mM	0	0	0	0		0	0	4
	25mM	0	0	0	0		0	0	4
	50mM	0	0	0	0		0	0	4
	100mM	0	0	0	0		0	0	4
	200mM	0	0	0	0		0	0	4
	400mM	0.090909	0.1	0.25	0.3		18.5227	5.28582	4
	800mM	0.545455	0.7	0.583333	0.6		60.7197	3.29719	4

## Sheet: Figure4-C
naïve	sucrose	group1	group2	group3	group4		mean (%)	SEM (%)	number
	6.25mM	0	0	0	0		0	0	4
	12.5mM	0	0	0	0		0	0	4
	25mM	0	0	0	0		0	0	4
	50mM	0	0	0	0		0	0	4
	100mM	0	0.071429	0	0		1.78573	1.78573	4
	200mM	0.272727	0.142857	0.166667	0.090909		16.829	3.82365	4
	400mM	0.818182	0.428571	0.75	0.636364		65.8279	8.52583	4
	800mM	0.909091	0.5	0.833333	0.727273		74.2424	8.8995	4
failed	sucrose	group1	group2	group3	group4		mean (%)	SEM (%)	number
	6.25mM	0	0	0	0		0	0	4
	12.5mM	0	0	0	0		0	0	4
	25mM	0	0	0	0		0	0	4
	50mM	0	0	0	0		0	0	4
	100mM	0	0	0	0		0	0	4
	200mM	0.25	0.090909	0.090909	0.090909		13.0682	3.97727	4
	400mM	0.666667	0.454545	0.636364	0.454545		55.303	5.71959	4
	800mM	0.916667	0.636364	0.727273	0.727273		75.1894	5.8956	4
satisfied	sucrose	group1	group2	group3	group4		mean (%)	SEM (%)	number
	6.25mM	0	0	0	0		0	0	4
	12.5mM	0	0	0	0		0	0	4
	25mM	0	0	0	0		0	0	4
	50mM	0	0	0	0		0	0	4
	100mM	0.090909	0	0	0		2.27272	2.27272	4
	200mM	0.454545	0.166667	0	0.2		20.5303	9.38934	4
	400mM	0.727273	0.333333	0.5	0.4		49.0151	8.61408	4
	800mM	0.909091	0.75	0.75	0.9		82.7273	4.4652	4

## Sheet: Figure4-D
naïve	sucrose	group1	group2	group3	group4	group5		mean (%)	SEM (%)	number
	6.25mM	0	0	0	0	0		0	0	5
	12.5mM	0	0	0	0	0		0	0	5
	25mM	0	0	0	0	0		0	0	5
	50mM	0	0	0	0	0		0	0	5
	100mM	0	0	0.2	0	0.166667		7.33334	4.52156	5
	200mM	0.583333	0	0.3	0.25	0.416667		31	9.64077	5
	400mM	0.833333	0.285714	0.5	0.75	0.583333		59.0476	9.63183	5
	800mM	1	1	0.8	1	0.916667		94.3333	3.92994	5
failed	sucrose	group1	group2	group3	group4	group5
	6.25mM	0	0	0	0	0		0	0	5
	12.5mM	0	0	0	0	0		0	0	5
	25mM	0	0	0	0	0		0	0	5
	50mM	0	0	0	0	0		0	0	5
	100mM	0	0	0	0	0		0	0	5
	200mM	0	0	0	0	0		0	0	5
	400mM	0.333333	0.3	0.454545	0.1	0.090909		25.5757	7.03304	5
	800mM	0.555556	0.5	0.909091	0.5	0.636364		62.0202	7.6418	5
satisfied	sucrose	group1	group2	group3	group4	group5
	6.25mM	0	0	0	0	0		0	0	5
	12.5mM	0	0	0	0	0		0	0	5
	25mM	0	0	0	0	0		0	0	5
	50mM	0	0	0	0	0		0	0	5
	100mM	0	0	0.125	0	0.125		5	3.06186	5
	200mM	0.285714	0.333333	0.5	0	0.375		29.8809	8.27445	5
	400mM	1	0.5	0.875	0.333333	0.75		69.1667	12.1906	5
	800mM	1	0.666667	0.875	0.888889	0.75		83.6111	5.80017	5

## Sheet: Figure4-E
naïve	sucrose	group1	group2	group3	group4		mean (%)	SEM (%)	number
	6.25mM	0	0	0	0		0	0	4
	12.5mM	0	0	0	0		0	0	4
	25mM	0	0	0	0		0	0	4
	50mM	0	0	0	0		0	0	4
	100mM	0	0.071429	0.222222	0		7.34127	5.23824	4
	200mM	0.142857	0.142857	0.444444	0.25		24.504	7.1104	4
	400mM	0.571429	0.785714	0.555556	0.5		60.3175	6.27435	4
	800mM	0.714286	0.857143	0.888889	0.75		80.2579	4.18199	4
failed	sucrose	group1	group2	group3	group4		mean (%)	SEM (%)	number
	6.25mM	0	0	0	0		0	0	4
	12.5mM	0	0	0	0		0	0	4
	25mM	0	0	0	0		0	0	4
	50mM	0	0	0	0		0	0	4
	100mM	0	0	0	0		0	0	4
	200mM	0	0.125	0	0		3.125	3.125	4
	400mM	0.2	0.25	0.428571	0.25		28.2143	5.0212	4
	800mM	0.4	0.375	0.571429	0.75		52.4107	8.70357	4
satisfied	sucrose	group1	group2	group3	group4		mean (%)	SEM (%)	number
	6.25mM	0	0	0	0		0	0	4
	12.5mM	0	0	0	0		0	0	4
	25mM	0	0	0	0		0	0	4
	50mM	0	0	0	0		0	0	4
	100mM	0.083333	0	0	0		2.08333	2.08333	4
	200mM	0.083333	0.090909	0.083333	0.333333		14.7727	6.18944	4
	400mM	0.416667	0.454545	0.5	0.666667		50.947	5.50982	4
	800mM	0.833333	0.727273	0.666667	0.75		74.4318	3.44917	4

## Sheet: Figure4-F
wild type
naïve	group1	group2	group3	group4		failed	group1	group2	group3	group4		satisfied	group1	group2	group3	group4
αS:	0.714423	1.32373	2.06036	1.28337		αS:	0.893739	1.50363	1.62571	1.29731		αS:	1.2577	0.966347	3.35308	2.36005
MAT	161.228	94.8869	144.565	258.955		MAT	517.405	588.731	305.266	968.557		MAT	314.235	122.549	259.498	207.41
Dop1R1 mutant
naïve	group1	group2	group3	group4		failed	group1	group2	group3	group4		satisfied	group1	group2	group3	group4
αS:	1.10957	1.41416	1.24647	1.58012		αS:	9.86011	1.73578	1.9335	1.58012		αS:	2.50493	3.05183	1.65274	1.56712
MAT	711.448	776.635	742.092	789.691		MAT	832.099	795.052	616.026	789.691		MAT	760.423	659.862	681.415	645.208
Dop2R mutant
naïve	group1	group2	group3	group4		failed	group1	group2	group3	group4		satisfied	group1	group2	group3	group4
αS:	2.4206	0.864229	2.31907	1.6263		αS:	1.88767	1.28646	1.6263	1.53678		αS:	1.48906	1.52902	1.83523	1.83504
MAT	265.932	682.108	307.805	387.116		MAT	309.593	526.866	387.116	473.841		MAT	239.128	509.252	453.28	423.596
Dop1R2 mutant
naïve	group1	group2	group3	group4	group5		failed	group1	group2	group3	group4	group5		satisfied	group1	group2	group3	group4	group5
αS:	2.57589	9.99723	1.02118	2.34437	1.18824		αS:	1.38098	1.30154	2.91951	2.23289	2.87198		αS:	9.99714	1.01873	1.80898	2.87883	1.21498
MAT	192.623	426.237	356.058	282.853	273.562		MAT	673.138	757.648	422.974	799.478	698.831		MAT	213.118	426.636	202.626	475.896	269.594
DopEcR mutant
naïve	group1	group2	group3	group4		failed	group1	group2	group3	group4		satisfied	group1	group2	group3	group4
αS:	1.40128	2.69068	1.0465	1.27165		αS:	1.29731	0.848256	1.30627	2.28197		αS:	1.89482	1.53678	1.36501	1.30907
MAT	414.204	299.834	269.797	409.613		MAT	968.557	1138.05	607.117	568.171		MAT	450.726	473.841	484.421	318.593
