# Supplementary material for: Sexual failure decreases sweet taste perception in male Drosophila via dopaminergic signaling
Source: eLife. 2025 Jul 23;14:RP105094. doi: 10.7554/eLife.105094 (PMC12286605; doi:10.7554/eLife.105094)
Supplement: Figure 5—figure supplement 1—source data 1. [file elife-105094-fig5-figsupp1-data1.xlsx]

## Sheet: Figure5-supplement1-A
Dop1R2-GAL4/UAS-NaChBac
naïve	sucrose	group1	group2	group3	group4		mean (%)	SEM (%)	number
	6.25mM	0	0	0	0		0	0	4
	12.5mM	0	0	0	0		0	0	4
	25mM	0	0	0	0		0	0	4
	50mM	0.2	0.1	0.2	0		12.5	4.78714	4
	100mM	0.3	0.3	0.4	0.2		30	4.08248	4
	200mM	0.6	0.5	0.6	0.7		60	4.08248	4
	400mM	0.9	1	0.8	0.9		90	4.08248	4
	800mM	1	1	1	1		100	0	4
Dop1R2-GAL4/UAS-NaChBac
failed	sucrose	group1	group2	group3	group4		mean (%)	SEM (%)	number
	6.25mM	0	0	0	0		0	0	4
	12.5mM	0	0	0	0		0	0	4
	25mM	0	0	0	0		0	0	4
	50mM	0	0	0	0		0	0	4
	100mM	0	0.1	0	0.2		7.5	4.78714	4
	200mM	0.1	0.1	0.2	0.2		15	2.88675	4
	400mM	0.6	0.5	0.7	0.6		60	4.08248	4
	800mM	1	1	0.9	0.9		95	2.88675	4
Dop1R2-GAL4/UAS-NaChBac
satisfied	sucrose	group1	group2	group3	group4		mean (%)	SEM (%)	number
	6.25mM	0	0	0	0		0	0	4
	12.5mM	0	0	0	0		0	0	4
	25mM	0	0	0	0		0	0	4
	50mM	0	0.1	0.1	0.2		10	4.08248	4
	100mM	0.1	0.3	0.1	0.3		20	5.7735	4
	200mM	0.5	0.6	0.7	0.7		62.5	4.78714	4
	400mM	0.9	1	1	0.9		95	2.88675	4
	800mM	1	1	1	1		100	0	4

## Sheet: Figure5-supplement1-B
DopEcR-GAL4/UAS-NaChBac
naïve	sucrose	group1	group2	group3	group4		mean (%)	SEM (%)	number
	6.25mM	0	0	0	0		0	0	4
	12.5mM	0	0	0	0		0	0	4
	25mM	0	0	0	0		0	0	4
	50mM	0	0.2	0	0.1		7.5	4.78714	4
	100mM	0.1	0.3	0.3	0.1		20	5.7735	4
	200mM	0.6	0.7	0.5	0.7		62.5	4.78714	4
	400mM	0.8	0.9	0.8	0.8		82.5	2.5	4
	800mM	1	1	1	1		100	0	4
DopEcR-GAL4/UAS-NaChBac
failed	sucrose	group1	group2	group3	group4		mean (%)	SEM (%)	number
	6.25mM	0	0	0	0		0	0	4
	12.5mM	0	0	0	0		0	0	4
	25mM	0	0	0	0		0	0	4
	50mM	0	0	0	0		0	0	4
	100mM	0.2	0	0.1	0.3		15	6.45497	4
	200mM	0.3	0.3	0.1	0.3		25	5	4
	400mM	0.8	0.7	0.7	0.6		70	4.08248	4
	800mM	0.9	1	0.8	1		92.5	4.78714	4
DopEcR-GAL4/UAS-NaChBac
satisfied	sucrose	group1	group2	group3	group4		mean (%)	SEM (%)	number
	6.25mM	0	0	0	0		0	0	4
	12.5mM	0	0	0	0		0	0	4
	25mM	0	0	0	0		0	0	4
	50mM	0	0	0	0		0	0	4
	100mM	0.3	0.3	0.4	0.5		37.5	4.78714	4
	200mM	0.6	0.7	0.5	0.8		65	6.45497	4
	400mM	1	0.8	0.9	1		92.5	4.78714	4
	800mM	1	1	1	1		100	0	4

## Sheet: Figure5-supplement1-C
Dop1R2-GAL4/UAS-NaChBac
naïve	group1	group2	group3	group4		failed	group1	group2	group3	group4		satisfied	group1	group2	group3	group4
αS:	1.28664	1.56407	1.07361	2.13125		αS:	2.84854	2.73676	2.12676	1.44272		αS:	2.23064	1.63912	2.97388	1.38734
MAT	148.523	164.943	141.765	155.874		MAT	358.591	391.181	311.815	328.266		MAT	200.001	150.153	163.879	135.787
DopEcR-GAL4/UAS-NaChBac
naïve	group1	group2	group3	group4		failed	group1	group2	group3	group4		satisfied	group1	group2	group3	group4
αS:	1.88179	1.38734	1.3655	1.97469		αS:	1.56165	2.01209	1.95211	1.22348		αS:	1.81463	1.56607	1.37163	2.11802
MAT	189.1	135.787	186.905	168.769		MAT	251.078	282.896	338.006	270.327		MAT	154.7	151.084	162.727	108.02
