# Supplementary material for: Sexual failure decreases sweet taste perception in male Drosophila via dopaminergic signaling
Source: eLife. 2025 Jul 23;14:RP105094. doi: 10.7554/eLife.105094 (PMC12286605; doi:10.7554/eLife.105094)
Supplement: Figure 5—source data 1. [file elife-105094-fig5-data1.xlsx]

## Sheet: Figure5-A
Dop1R1-GAL4/UAS-NaChBac
naïve	sucrose	group1	group2	group3	group4		mean (%)	SEM (%)	number			group1	group2	group3	group4
	6.25mM	0	0	0	0		0	0	4		αS:	2.7982	4.39583	8.88954	3.11018
	12.5mM	0	0	0	0		0	0	4		MAT	566.289	282.843	237.368	242.423
	25mM	0	0	0	0		0	0	4
	50mM	0	0	0	0		0	0	4
	100mM	0	0	0.1	0		2.5	2.5	4
	200mM	0	0.1	0.1	0.3		12.5	6.29153	4
	400mM	0.2	0.9	1	0.9		75	18.4842	4
	800mM	0.8	1	1	1		95	5	4
Dop1R1-GAL4/UAS-NaChBac
failed	sucrose	group1	group2	group3	group4		mean (%)	SEM (%)	number			group1	group2	group3	group4
	6.25mM	0	0	0	0		0	0	4		αS:	3.10435	2.97385	2.77967	6.43787
	12.5mM	0	0	0	0		0	0	4		MAT	484.988	244.083	241.979	232.117
	25mM	0	0	0	0		0	0	4
	50mM	0	0	0	0		0	0	4
	100mM	0	0	0.1	0.1		5	2.88675	4
	200mM	0	0.3	0.3	0.2		20	7.07107	4
	400mM	0.3	0.9	0.9	1		77.5	16.0078	4
	800mM	0.9	0.9	1	1		95	2.88675	4
Dop1R1-GAL4/UAS-NaChBac
satisfied	sucrose	group1	group2	group3	group4		mean (%)	SEM (%)	number			group1	group2	group3	group4
	6.25mM	0	0	0	0		0	0	4		αS:	2.38803	2.08282	2.38883	1.55401
	12.5mM	0	0	0	0		0	0	4		MAT	306.728	198.8	260.831	264.932
	25mM	0	0	0	0		0	0	4
	50mM	0	0.1	0	0		2.5	2.5	4
	100mM	0	0.1	0	0.2		7.5	4.78714	4
	200mM	0.2	0.5	0.3	0.3		32.5	6.29153	4
	400mM	0.7	0.9	0.8	0.7		77.5	4.78714	4
	800mM	1	1	1	1		100	0	4
Dop1R1-GAL4/+
naïve	sucrose	group1	group2	group3	group4		mean (%)	SEM (%)	number			group1	group2	group3	group4
	6.25mM	0	0	0	0		0	0	4		αS:	0.965084	1.22406	1.27647	2.08207
	12.5mM	0	0	0	0		0	0	4		MAT	1106.6	666.598	692.309	780.879
	25mM	0	0	0	0		0	0	4
	50mM	0	0	0	0		0	0	4
	100mM	0	0	0	0		0	0	4
	200mM	0.1	0.1	0.1	0.1		10	0	4
	400mM	0.1	0.3	0.3	0.1		20	5.7735	4
	800mM	0.4	0.5	0.5	0.5		47.5	2.5	4
Dop1R1-GAL4/+
failed	sucrose	group1	group2	group3	group4		mean (%)	SEM (%)	number			group1	group2	group3	group4
	6.25mM	0	0	0	0		0	0	4		αS:	1.70877	1.62667	1.46286	1.0742
	12.5mM	0	0	0	0		0	0	4		MAT	1600	948.147	1600	1451.35
	25mM	0	0	0	0		0	0	4
	50mM	0	0	0	0		0	0	4
	100mM	0	0	0	0		0	0	4
	200mM	0	0	0	0		0	0	4
	400mM	0	0.1	0	0.1		5	2.88675	4
	800mM	0.1	0.3	0.1	0.3		20	5.7735	4
Dop1R1-GAL4/+
satisfied	sucrose	group1	group2	group3	group4		mean (%)	SEM (%)	number			group1	group2	group3	group4
	6.25mM	0	0	0	0		0	0	4		αS:	1.20114	1.20114	1.34053	1.556
	12.5mM	0	0	0	0		0	0	4		MAT	855.232	855.232	702.454	799.174
	25mM	0	0	0	0		0	0	4
	50mM	0	0	0	0		0	0	4
	100mM	0	0	0	0		0	0	4
	200mM	0.1	0.1	0.1	0.1		10	0	4
	400mM	0.1	0.1	0.3	0.1		15	5	4
	800mM	0.5	0.5	0.4	0.5		47.5	2.5	4
+/UAS-NaChBac
naïve	sucrose	group1	group2	group3	group4		mean (%)	SEM (%)	number			group1	group2	group3	group4
	6.25mM	0	0	0	0		0	0	4		αS:	1.88214	1.64436	1.21315	1.80612
	12.5mM	0	0	0	0		0	0	4		MAT	232.808	214.562	246.903	309.581
	25mM	0	0	0	0		0	0	4
	50mM	0	0	0	0		0	0	4
	100mM	0.1	0.1	0.1	0		7.5	2.5	4
	200mM	0.4	0.5	0.5	0.3		42.5	4.78714	4
	400mM	0.8	0.8	0.7	0.6		72.5	4.78714	4
	800mM	1	0.9	0.8	1		92.5	4.78714	4
+/UAS-NaChBac
failed	sucrose	group1	group2	group3	group4		mean (%)	SEM (%)	number			group1	group2	group3	group4
	6.25mM	0	0	0	0		0	0	4		αS:	1.81428	2.19635	1.37406	1.56033
	12.5mM	0	0	0	0		0	0	4		MAT	468.39	264.661	339.505	362.219
	25mM	0	0	0	0		0	0	4
	50mM	0	0	0	0		0	0	4
	100mM	0	0	0	0		0	0	4
	200mM	0.1	0.3	0.3	0.2		22.5	4.78714	4
	400mM	0.4	0.8	0.6	0.6		60	8.16497	4
	800mM	0.8	0.9	0.8	0.8		82.5	2.5	4
+/UAS-NaChBac
satisfied	sucrose	group1	group2	group3	group4		mean (%)	SEM (%)	number			group1	group2	group3	group4
	6.25mM	0	0	0	0		0	0	4		αS:	2.16434	3.11018	1.8086	2.35516
	12.5mM	0	0	0	0		0	0	4		MAT	238.5	242.423	190.233	220.803
	25mM	0	0	0	0		0	0	4
	50mM	0	0	0	0		0	0	4
	100mM	0	0	0.2	0.1		7.5	4.78714	4
	200mM	0.4	0.3	0.5	0.4		40	4.08248	4
	400mM	0.8	0.9	0.9	0.9		87.5	2.5	4
	800mM	1	1	1	1		100	0	4

## Sheet: Figure5-B
Dop2R-GAL4/UAS-NaChBac
naïve	sucrose	group1	group2	group3	group4		mean (%)	SEM (%)	number			group1	group2	group3	group4
	6.25mM	0	0	0	0		0	0	4		αS:	3.50486	3.59544	3.50296	6.43787
	12.5mM	0	0	0	0		0	0	4		MAT	373.214	261.474	304.577	232.117
	25mM	0	0	0	0		0	0	4
	50mM	0	0	0	0		0	0	4
	100mM	0	0	0.1	0.1		5	2.88675	4
	200mM	0	0.2	0.1	0.2		12.5	4.78714	4
	400mM	0.6	0.9	0.8	1		82.5	8.53913	4
	800mM	0.9	1	1	1		97.5	2.5	4
Dop2R-GAL4/UAS-NaChBac
failed	sucrose	group1	group2	group3	group4		mean (%)	SEM (%)	number			group1	group2	group3	group4
	6.25mM	0	0	0	0		0	0	4		αS:	2.64164	3.43589	2.64159	4.34266
	12.5mM	0	0	0	0		0	0	4		MAT	280.467	261.384	285.243	282.452
	25mM	0	0	0	0		0	0	4
	50mM	0	0.1	0	0		2.5	2.5	4
	100mM	0.1	0.1	0	0.1		7.5	2.5	4
	200mM	0.2	0.2	0.2	0.1		17.5	2.5	4
	400mM	0.8	0.9	0.8	0.9		85	2.88675	4
	800mM	1	1	0.9	1		97.5	2.5	4
Dop2R-GAL4/UAS-NaChBac
satisfied	sucrose	group1	group2	group3	group4		mean (%)	SEM (%)	number			group1	group2	group3	group4
	6.25mM	0	0	0	0		0	0	4		αS:	2.39299	2.82116	1.88117	4.39583
	12.5mM	0	0	0	0		0	0	4		MAT	282.851	282.844	211.545	282.843
	25mM	0	0	0	0		0	0	4
	50mM	0	0	0	0		0	0	4
	100mM	0.1	0	0.2	0		7.5	4.78714	4
	200mM	0.2	0.2	0.4	0.1		22.5	6.29153	4
	400mM	0.8	0.8	0.9	0.9		85	2.88675	4
	800mM	0.9	1	1	1		97.5	2.5	4
Dop2R-GAL4/+
naïve	sucrose	group1	group2	group3	group4		mean (%)	SEM (%)	number			group1	group2	group3	group4
	6.25mM	0	0	0	0		0	0	4		αS:	2.29129	1.59749	2.21574	1.50254
	12.5mM	0	0	0	0		0	0	4		MAT	616.741	320.571	474.324	355.547
	25mM	0	0	0	0		0	0	4
	50mM	0	0	0	0		0	0	4
	100mM	0	0	0	0		0	0	4
	200mM	0	0.3	0.2	0.3		20	7.07107	4
	400mM	0.2	0.6	0.3	0.5		40	9.12871	4
	800mM	0.7	0.9	0.9	0.9		85	5	4
Dop2R-GAL4/+
failed	sucrose	group1	group2	group3	group4		mean (%)	SEM (%)	number			group1	group2	group3	group4
	6.25mM	0	0	0	0		0	0	4		αS:	1.07549	2.6195	1.58012	1.90312
	12.5mM	0	0	0	0		0	0	4		MAT	950.99	718.405	789.691	685.367
	25mM	0	0	0	0		0	0	4
	50mM	0	0	0	0		0	0	4
	100mM	0	0	0	0		0	0	4
	200mM	0	0	0	0		0	0	4
	400mM	0.3	0.1	0.2	0.2		20	4.08248	4
	800mM	0.4	0.6	0.5	0.6		52.5	4.78714	4
Dop2R-GAL4/+
satisfied	sucrose	group1	group2	group3	group4		mean (%)	SEM (%)	number			group1	group2	group3	group4
	6.25mM	0	0	0	0		0	0	4		αS:	1.89794	1.50629	1.19898	1.48703
	12.5mM	0	0	0	0		0	0	4		MAT	573.045	449.427	315.579	395.426
	25mM	0	0	0	0		0	0	4
	50mM	0	0	0	0		0	0	4
	100mM	0	0	0.1	0		2.5	2.5	4
	200mM	0	0.2	0.4	0.3		22.5	8.53913	4
	400mM	0.3	0.4	0.5	0.4		40	4.08248	4
	800mM	0.7	0.8	0.9	0.9		82.5	4.78714	4
+/UAS-NaChBac
naïve	sucrose	group1	group2	group3	group4		mean (%)	SEM (%)	number			group1	group2	group3	group4
	6.25mM	0	0	0	0		0	0	4		αS:	1.88214	1.64436	1.21315	1.80612
	12.5mM	0	0	0	0		0	0	4		MAT	232.808	214.562	246.903	309.581
	25mM	0	0	0	0		0	0	4
	50mM	0	0	0	0		0	0	4
	100mM	0.1	0.1	0.1	0		7.5	2.5	4
	200mM	0.4	0.5	0.5	0.3		42.5	4.78714	4
	400mM	0.8	0.8	0.7	0.6		72.5	4.78714	4
	800mM	1	0.9	0.8	1		92.5	4.78714	4
+/UAS-NaChBac
failed	sucrose	group1	group2	group3	group4		mean (%)	SEM (%)	number			group1	group2	group3	group4
	6.25mM	0	0	0	0		0	0	4		αS:	1.81428	2.19635	1.37406	1.56033
	12.5mM	0	0	0	0		0	0	4		MAT	468.39	264.661	339.505	362.219
	25mM	0	0	0	0		0	0	4
	50mM	0	0	0	0		0	0	4
	100mM	0	0	0	0		0	0	4
	200mM	0.1	0.3	0.3	0.2		22.5	4.78714	4
	400mM	0.4	0.8	0.6	0.6		60	8.16497	4
	800mM	0.8	0.9	0.8	0.8		82.5	2.5	4
+/UAS-NaChBac
satisfied	sucrose	group1	group2	group3	group4		mean (%)	SEM (%)	number			group1	group2	group3	group4
	6.25mM	0	0	0	0		0	0	4		αS:	2.16434	3.11018	1.8086	2.35516
	12.5mM	0	0	0	0		0	0	4		MAT	238.5	242.423	190.233	220.803
	25mM	0	0	0	0		0	0	4
	50mM	0	0	0	0		0	0	4
	100mM	0	0	0.2	0.1		7.5	4.78714	4
	200mM	0.4	0.3	0.5	0.4		40	4.08248	4
	400mM	0.8	0.9	0.9	0.9		87.5	2.5	4
	800mM	1	1	1	1		100	0	4

## Sheet: Figure5-C
Dop1R1-GAL4/UAS-Kir2.1
naïve	sucrose	group1	group2	group3	group4		mean (%)	SEM (%)	number			group1	group2	group3	group4
	6.25mM	0	0	0	0		0	0	4		αS:	10	4.39514	3.43166	9.99946
	12.5mM	0	0	0	0		0	0	4		MAT	465.803	565.696	522.856	440.346
	25mM	0	0	0	0		0	0	4
	50mM	0	0	0	0		0	0	4
	100mM	0	0	0.1	0		2.5	2.5	4
	200mM	0	0	0.1	0		2.5	2.5	4
	400mM	0.1	0.1	0.2	0.2		15	2.88675	4
	800mM	1	0.9	0.9	1		95	2.88675	4
Dop1R1-GAL4/UAS-Kir2.1
failed	sucrose	group1	group2	group3	group4		mean (%)	SEM (%)	number			group1	group2	group3	group4
	6.25mM	0	0	0	0		0	0	4		αS:	4.39514	9.99987	4.39514	10
	12.5mM	0	0	0	0		0	0	4		MAT	565.696	686.984	565.696	565.685
	25mM	0	0	0	0		0	0	4
	50mM	0	0	0	0		0	0	4
	100mM	0	0	0	0		0	0	4
	200mM	0	0	0	0		0	0	4
	400mM	0.1	0	0.1	0		5	2.88675	4
	800mM	0.9	0.9	0.9	1		92.5	2.5	4
Dop1R1-GAL4/UAS-Kir2.1
satisfied	sucrose	group1	group2	group3	group4		mean (%)	SEM (%)	number			group1	group2	group3	group4
	6.25mM	0	0	0	0		0	0	4		αS:	10	10	4.34186	9.99946
	12.5mM	0	0	0	0		0	0	4		MAT	465.803	465.803	564.916	440.346
	25mM	0	0	0	0		0	0	4
	50mM	0	0	0	0		0	0	4
	100mM	0	0	0	0		0	0	4
	200mM	0	0	0.1	0		2.5	2.5	4
	400mM	0.1	0.1	0.1	0.2		12.5	2.5	4
	800mM	1	1	0.9	1		97.5	2.5	4
Dop1R1-GAL4/+
naïve	sucrose	group1	group2	group3	group4		mean (%)	SEM (%)	number			group1	group2	group3	group4
	6.25mM	0	0	0	0		0	0	4		αS:	1.59936	3.10999	2.89199	1.44631
	12.5mM	0	0	0	0		0	0	4		MAT	222.341	330	196.495	272.707
	25mM	0	0	0	0		0	0	4
	50mM	0	0	0	0		0	0	4
	100mM	0.2	0	0.1	0.1		10	4.08248	4
	200mM	0.4	0.1	0.5	0.4		35	8.66025	4
	400mM	0.8	0.7	1	0.6		77.5	8.53913	4
	800mM	1	1	1	1		100	0	4
Dop1R1-GAL4/+
failed	sucrose	group1	group2	group3	group4		mean (%)	SEM (%)	number			group1	group2	group3	group4
	6.25mM	0	0	0	0		0	0	4		αS:	2.6195	1.28148	1.04332	2.35141
	12.5mM	0	0	0	0		0	0	4		MAT	718.405	806.859	506.142	523.087
	25mM	0	0	0	0		0	0	4
	50mM	0	0	0	0		0	0	4
	100mM	0	0	0	0		10	4.08248	4
	200mM	0	0.1	0.2	0		35	8.66025	4
	400mM	0.1	0.2	0.5	0.3		77.5	8.53913	4
	800mM	0.6	0.5	0.6	0.8		100	0	4
Dop1R1-GAL4/+
satisfied	sucrose	group1	group2	group3	group4		mean (%)	SEM (%)	number			group1	group2	group3	group4
	6.25mM	0	0	0	0		0	0	4		αS:	1.22251	1.55306	1.62456	2.35516
	12.5mM	0	0	0	0		0	0	4		MAT	200.571	200.077	300.571	220.803
	25mM	0	0	0	0		0	0	4
	50mM	0	0	0	0		0	0	4
	100mM	0.3	0.2	0.1	0.1		17.5	4.78714	4
	200mM	0.5	0.5	0.3	0.4		42.5	4.78714	4
	400mM	0.7	0.8	0.6	0.9		75	6.45497	4
	800mM	1	1	1	1		100	0	4
+/UAS-Kir2.1
naïve	sucrose	group1	group2	group3	group4		mean (%)	SEM (%)	number			group1	group2	group3	group4
	6.25mM	0	0	0	0		0	0	4		αS:	2.3893	1.88394	1.53448	2.11735
	12.5mM	0	0	0	0		0	0	4		MAT	153.36	171.841	226.263	216.052
	25mM	0	0	0	0		0	0	4
	50mM	0	0	0	0		0	0	4
	100mM	0.2	0.2	0.1	0		12.5	4.78714	4
	200mM	0.7	0.6	0.5	0.5		57.5	4.78714	4
	400mM	1	0.9	0.7	0.8		85	6.45497	4
	800mM	1	1	1	1		100	0	4
+/UAS-Kir2.1
failed	sucrose	group1	group2	group3	group4		mean (%)	SEM (%)	number			group1	group2	group3	group4
	6.25mM	0	0	0	0		0	0	4		αS:	2.29129	1.63153	1.04332	1.32774
	12.5mM	0	0	0	0		0	0	4		MAT	616.741	562.676	506.142	638.642
	25mM	0	0	0	0		0	0	4
	50mM	0	0	0	0		0	0	4
	100mM	0	0	0	0		0	0	4
	200mM	0	0.1	0.2	0.1		10	4.08248	4
	400mM	0.2	0.3	0.5	0.3		32.5	6.29153	4
	800mM	0.7	0.7	0.6	0.6		65	2.88675	4
+/UAS-Kir2.1
satisfied	sucrose	group1	group2	group3	group4		mean (%)	SEM (%)	number			group1	group2	group3	group4
	6.25mM	0	0	0	0		0	0	4		αS:	2.16436	9.99486	2.69263	2.12983
	12.5mM	0	0	0	0		0	0	4		MAT	238.5	194.454	224.675	256.63
	25mM	0	0	0	0		0	0	4
	50mM	0	0	0	0		0	0	4
	100mM	0	0	0	0.1		2.5	2.5	4
	200mM	0.4	0.6	0.4	0.3		42.5	6.29153	4
	400mM	0.8	1	0.9	0.8		87.5	4.78714	4
	800mM	1	1	0.9	1		97.5	2.5	4

## Sheet: Figure5-D
Dop2R-GAL4/UAS-Kir2.1
naïve	sucrose	group1	group2	group3	group4		mean (%)	SEM (%)	number			group1	group2	group3	group4
	6.25mM	0	0	0	0		0	0	4		αS:	9.84632	9.99287	2.12438	1.90312
	12.5mM	0	0	0	0		0	0	4		MAT	800	777.814	478.785	685.367
	25mM	0	0	0	0		0	0	4
	50mM	0	0	0	0		0	0	4
	100mM	0	0	0	0		0	0	4
	200mM	0	0	0	0		0	0	4
	400mM	0	0	0.4	0.2		15	9.57427	4
	800mM	0.5	0.6	0.8	0.6		62.5	6.29153	4
Dop2R-GAL4/UAS-Kir2.1
failed	sucrose	group1	group2	group3	group4		mean (%)	SEM (%)	number			group1	group2	group3	group4
	6.25mM	0	0	0	0		0	0	4		αS:	9.88226	9.99287	1.90312	1.58012
	12.5mM	0	0	0	0		0	0	4		MAT	823.078	777.814	685.367	789.691
	25mM	0	0	0	0		0	0	4
	50mM	0	0	0	0		0	0	4
	100mM	0	0	0	0		0	0	4
	200mM	0	0	0	0		0	0	4
	400mM	0	0	0.2	0.2		10	5.7735	4
	800mM	0.4	0.6	0.6	0.5		52.5	4.78714	4
Dop2R-GAL4/UAS-Kir2.1
satisfied	sucrose	group1	group2	group3	group4		mean (%)	SEM (%)	number			group1	group2	group3	group4
	6.25mM	0	0	0	0		0	0	4		αS:	1.90312	2.6195	2.12438	1.89794
	12.5mM	0	0	0	0		0	0	4		MAT	685.367	718.405	478.785	573.045
	25mM	0	0	0	0		0	0	4
	50mM	0	0	0	0		0	0	4
	100mM	0	0	0	0		0	0	4
	200mM	0	0	0	0		0	0	4
	400mM	0.2	0.1	0.4	0.3		25	6.45497	4
	800mM	0.6	0.6	0.8	0.7		67.5	4.78714	4
Dop2R-GAL4/+
naïve	sucrose	group1	group2	group3	group4		mean (%)	SEM (%)	number			group1	group2	group3	group4
	6.25mM	0	0	0	0		0	0	4		αS:	2.38883	2.64164	1.85094	2.16436
	12.5mM	0	0	0	0		0	0	4		MAT	260.831	280.467	379.401	238.5
	25mM	0	0	0	0		0	0	4
	50mM	0	0	0	0		0	0	4
	100mM	0	0.1	0	0		2.5	2.5	4
	200mM	0.3	0.2	0.1	0.4		25	6.45497	4
	400mM	0.8	0.8	0.6	0.8		75	5	4
	800mM	1	1	0.8	1		95	5	4
Dop2R-GAL4/+
failed	sucrose	group1	group2	group3	group4		mean (%)	SEM (%)	number			group1	group2	group3	group4
	6.25mM	0	0	0	0		0	0	4		αS:	1.56032	1.32774	1.70451	1.16378
	12.5mM	0	0	0	0		0	0	4		MAT	362.218	638.642	526.329	370.896
	25mM	0	0	0	0		0	0	4
	50mM	0	0	0	0		0	0	4
	100mM	0	0	0	0		2.5	2.5	4
	200mM	0.2	0.1	0	0.3		25	6.45497	4
	400mM	0.6	0.3	0.4	0.6		75	5	4
	800mM	0.8	0.6	0.7	0.7		95	5	4
Dop2R-GAL4/+
satisfied	sucrose	group1	group2	group3	group4		mean (%)	SEM (%)	number			group1	group2	group3	group4
	6.25mM	0	0	0	0		0	0	4		αS:	1.72055	1.88179	2.35537	1.88394
	12.5mM	0	0	0	0		0	0	4		MAT	192.638	189.1	181.158	171.841
	25mM	0	0	0	0		0	0	4
	50mM	0	0	0	0		0	0	4
	100mM	0.1	0.1	0.1	0.2		12.5	2.5	4
	200mM	0.6	0.6	0.6	0.6		60	0	4
	400mM	0.8	0.8	0.9	0.9		85	2.88675	4
	800mM	0.9	1	1	1		97.5	2.5	4
+/UAS-Kir2.1
naïve	sucrose	group1	group2	group3	group4		mean (%)	SEM (%)	number			group1	group2	group3	group4
	6.25mM	0	0	0	0		0	0	4		αS:	2.84979	10	1.24252	2.38883
	12.5mM	0	0	0	0		0	0	4		MAT	223.091	232.902	230.474	260.831
	25mM	0	0	0.1	0		2.5	2.5	4
	50mM	0	0	0.1	0		2.5	2.5	4
	100mM	0	0	0.2	0		5	5	4
	200mM	0.4	0.1	0.4	0.3		30	7.07107	4
	400mM	0.9	1	0.7	0.8		85	6.45497	4
	800mM	1	1	1	1		100	0	4
+/UAS-Kir2.1
failed	sucrose	group1	group2	group3	group4		mean (%)	SEM (%)	number			group1	group2	group3	group4
	6.25mM	0	0	0	0		0	0	4		αS:	1.90312	2.12438	1.04332	1.56712
	12.5mM	0	0	0	0		0	0	4		MAT	685.367	478.785	506.142	645.208
	25mM	0	0	0	0		0	0	4
	50mM	0	0	0	0		0	0	4
	100mM	0	0	0	0		0	0	4
	200mM	0	0	0.2	0		5	5	4
	400mM	0.2	0.4	0.5	0.3		35	6.45497	4
	800mM	0.6	0.8	0.6	0.6		65	5	4
+/UAS-Kir2.1
satisfied	sucrose	group1	group2	group3	group4		mean (%)	SEM (%)	number			group1	group2	group3	group4
	6.25mM	0	0	0	0		0	0	4		αS:	2.19773	1.88394	1.21315	1.59874
	12.5mM	0	0	0	0		0	0	4		MAT	151.149	171.841	246.902	141.43
	25mM	0	0	0	0		0	0	4
	50mM	0.1	0	0	0.1		5	2.88675	4
	100mM	0.2	0.2	0.1	0.3		20	4.08248	4
	200mM	0.7	0.6	0.5	0.7		62.5	4.78714	4
	400mM	1	0.9	0.7	0.9		87.5	6.29153	4
	800mM	1	1	0.8	1		95	5	4
