# Supplementary material for: Sexual failure decreases sweet taste perception in male Drosophila via dopaminergic signaling
Source: eLife. 2025 Jul 23;14:RP105094. doi: 10.7554/eLife.105094 (PMC12286605; doi:10.7554/eLife.105094)
Supplement: Figure 6—figure supplement 1—source data 1. [file elife-105094-fig6-figsupp1-data1.xlsx]

## Sheet: Figure6-supplement1-C
Gr5a-GAL4/UAS-DopEcR RNAi
naïve	sucrose	group1	group2	group3	group4		mean (%)	SEM (%)	number			group1	group2	group3	group4
	6.25mM	0	0	0	0		0	0	4		αS:	9.99998	3.50486	4.39583	2.88744
	12.5mM	0	0	0	0		0	0	4		MAT	388.915	373.214	282.843	407.185
	25mM	0	0	0	0		0	0	4
	50mM	0	0	0	0		0	0	4
	100mM	0	0	0	0		0	0	4
	200mM	0	0	0.1	0		2.5	2.5	4
	400mM	0.6	0.6	0.9	0.5		65	8.66025	4
	800mM	1	0.9	1	0.9		95	2.88675	4
Gr5a-GAL4/UAS-DopEcR RNAi
failed	sucrose	group1	group2	group3	group4		mean (%)	SEM (%)	number			group1	group2	group3	group4
	6.25mM	0	0	0	0		0	0	4		αS:	2.23289	1.56712	3.5862	2.29129
	12.5mM	0	0	0	0		0	0	4		MAT	799.478	645.208	611.916	616.741
	25mM	0	0	0	0		0	0	4
	50mM	0	0	0	0		0	0	4
	100mM	0	0	0	0		0	0	4
	200mM	0	0	0	0		0	0	4
	400mM	0.1	0.3	0.1	0.2		17.5	4.78714	4
	800mM	0.5	0.6	0.8	0.7		65	6.45497	4
Gr5a-GAL4/UAS-DopEcR RNAi
satisfied	sucrose	group1	group2	group3	group4		mean (%)	SEM (%)	number			group1	group2	group3	group4
	6.25mM	0	0	0	0		0	0	4		αS:	3.10999	2.84854	2.38803	2.77891
	12.5mM	0	0	0	0		0	0	4		MAT	330	358.591	306.728	330.609
	25mM	0	0	0	0		0	0	4
	50mM	0	0	0	0		0	0	4
	100mM	0	0	0	0		0	0	4
	200mM	0.1	0.1	0.2	0.1		12.5	2.5	4
	400mM	0.7	0.6	0.7	0.7		67.5	2.5	4
	800mM	1	1	1	0.9		97.5	2.5	4
Gr5a-GAL4/+
naïve	sucrose	group1	group2	group3	group4		mean (%)	SEM (%)	number			group1	group2	group3	group4
	6.25mM	0	0	0	0		0	0	4		αS:	1.67389	1.22306	0.940784	1.29603
	12.5mM	0	0	0	0		0	0	4		MAT	338.135	330.672	303.864	379.664
	25mM	0	0	0	0		0	0	4
	50mM	0	0	0	0		0	0	4
	100mM	0.1	0.1	0.1	0		7.5	2.5	4
	200mM	0.2	0.3	0.5	0.3		32.5	6.29153	4
	400mM	0.6	0.6	0.6	0.5		57.5	2.5	4
	800mM	0.9	0.8	0.7	0.8		80	4.08248	4
Gr5a-GAL4/+
failed	sucrose	group1	group2	group3	group4		mean (%)	SEM (%)	number			group1	group2	group3	group4
	6.25mM	0	0	0	0		0	0	4		αS:	1.30154	9.90178	2.6195	1.30154
	12.5mM	0	0	0	0		0	0	4		MAT	757.648	848.886	718.405	757.648
	25mM	0	0	0	0		0	0	4
	50mM	0	0	0	0		0	0	4
	100mM	0	0	0	0		0	0	4
	200mM	0	0	0	0		0	0	4
	400mM	0.3	0	0.1	0.3		17.5	7.5	4
	800mM	0.5	0.3	0.6	0.5		47.5	6.29153	4
Gr5a-GAL4/+
satisfied	sucrose	group1	group2	group3	group4		mean (%)	SEM (%)	number			group1	group2	group3	group4
	6.25mM	0	0	0	0		0	0	4		αS:	1.66427	1.24284	1.48703	1.34343
	12.5mM	0	0	0	0		0	0	4		MAT	377.774	443.399	395.426	441.873
	25mM	0	0	0	0		0	0	4
	50mM	0	0	0	0		0	0	4
	100mM	0.1	0	0	0.1		5	2.88675	4
	200mM	0.1	0.2	0.3	0.2		20	4.08248	4
	400mM	0.6	0.5	0.4	0.4		47.5	4.78714	4
	800mM	0.8	0.7	0.9	0.8		80	4.08248	4
+/UAS-DopEcR RNAi
naïve	sucrose	group1	group2	group3	group4		mean (%)	SEM (%)	number			group1	group2	group3	group4
	6.25mM	0	0	0	0		0	0	4		αS:	2.64159	2.77975	2.82129	2.16436
	12.5mM	0	0	0	0		0	0	4		MAT	285.243	165.304	141.421	238.5
	25mM	0	0	0	0		0	0	4
	50mM	0	0	0	0		0	0	4
	100mM	0	0.1	0.2	0		7.5	4.78714	4
	200mM	0.2	0.7	0.8	0.4		52.5	13.7689	4
	400mM	0.8	0.9	1	0.8		87.5	4.78714	4
	800mM	0.9	1	1	1		97.5	2.5	4
+/UAS-DopEcR RNAi
failed	sucrose	group1	group2	group3	group4		mean (%)	SEM (%)	number			group1	group2	group3	group4
	6.25mM	0	0	0	0		0	0	4		αS:	1.63153	1.28746	2.12676	1.56712
	12.5mM	0	0	0	0		0	0	4		MAT	562.676	394.878	311.815	645.208
	25mM	0	0	0	0		0	0	4
	50mM	0	0	0	0		0	0	4
	100mM	0	0	0	0		0	0	4
	200mM	0.1	0.2	0.2	0		12.5	4.78714	4
	400mM	0.3	0.6	0.7	0.3		47.5	10.3078	4
	800mM	0.7	0.7	0.9	0.6		72.5	6.29153	4
+/UAS-DopEcR RNAi
satisfied	sucrose	group1	group2	group3	group4		mean (%)	SEM (%)	number			group1	group2	group3	group4
	6.25mM	0	0	0	0		0	0	4		αS:	1.23067	1.23067	1.60249	1.06446
	12.5mM	0	0	0	0		0	0	4		MAT	222.568	222.568	180	173.441
	25mM	0	0	0	0		0	0	4
	50mM	0	0	0	0		0	0	4
	100mM	0.2	0.2	0.2	0.4		25	5	4
	200mM	0.5	0.5	0.6	0.6		55	2.88675	4
	400mM	0.7	0.7	0.8	0.7		72.5	2.5	4
	800mM	0.9	0.9	1	0.9		92.5	2.5	4
