# Supplementary material for: Sexual failure decreases sweet taste perception in male Drosophila via dopaminergic signaling
Source: eLife. 2025 Jul 23;14:RP105094. doi: 10.7554/eLife.105094 (PMC12286605; doi:10.7554/eLife.105094)
Supplement: Figure 6—source data 1. [file elife-105094-fig6-data1.xlsx]

## Sheet: Figure6-C
Gr5a-GAL4/UAS-Dop1R1 RNAi
naïve	sucrose	group1	group2	group3	group4		mean (%)	SEM (%)	number			group1	group2	group3	group4
	6.25mM	0	0	0	0		0	0	4		αS:	2.29129	3.50486	3.10435	2.21478
	12.5mM	0	0	0	0		0	0	4		MAT	616.741	373.214	484.988	400.222
	25mM	0	0	0	0		0	0	4
	50mM	0	0	0	0		0	0	4
	100mM	0	0	0	0		0	0	4
	200mM	0	0	0	0.1		2.5	2.5	4
	400mM	0.2	0.6	0.3	0.5		40	9.12871	4
	800mM	0.7	0.9	0.9	0.9		85	5	4
Gr5a-GAL4/UAS-Dop1R1 RNAi
failed	sucrose	group1	group2	group3	group4		mean (%)	SEM (%)	number			group1	group2	group3	group4
	6.25mM	0	0	0	0		0	0	4		αS:	3.59286	9.99287	1.637	2.29129
	12.5mM	0	0	0	0		0	0	4		MAT	523.015	777.814	477.512	616.741
	25mM	0	0	0	0		0	0	4
	50mM	0	0	0	0		0	0	4
	100mM	0	0	0	0		0	0	4
	200mM	0	0	0	0		0	0	4
	400mM	0.2	0	0.5	0.2		22.5	10.3078	4
	800mM	0.9	0.6	0.7	0.7		72.5	6.29153	4
Gr5a-GAL4/UAS-Dop1R1 RNAi
satisfied	sucrose	group1	group2	group3	group4		mean (%)	SEM (%)	number			group1	group2	group3	group4
	6.25mM	0	0	0	0		0	0	4		αS:	1.50629	2.84227	1.77318	2.08609
	12.5mM	0	0	0	0		0	0	4		MAT	449.427	446.326	323.631	433.455
	25mM	0	0	0	0		0	0	4
	50mM	0	0	0	0		0	0	4
	100mM	0	0	0	0		0	0	4
	200mM	0.2	0	0.2	0		10	5.7735	4
	400mM	0.4	0.4	0.7	0.5		50	7.07107	4
	800mM	0.8	0.9	0.8	0.8		82.5	2.5	4
Gr5a-GAL4/+
naïve	sucrose	group1	group2	group3	group4		mean (%)	SEM (%)	number			group1	group2	group3	group4
	6.25mM	0	0	0	0		0	0	4		αS:	1.67389	1.22306	0.940784	1.29603
	12.5mM	0	0	0	0		0	0	4		MAT	338.135	330.672	303.864	379.664
	25mM	0	0	0	0		0	0	4
	50mM	0	0	0	0		0	0	4
	100mM	0.1	0.1	0.1	0		7.5	2.5	4
	200mM	0.2	0.3	0.5	0.3		32.5	6.29153	4
	400mM	0.6	0.6	0.6	0.5		57.5	2.5	4
	800mM	0.9	0.8	0.7	0.8		80	4.08248	4
Gr5a-GAL4/+
failed	sucrose	group1	group2	group3	group4		mean (%)	SEM (%)	number			group1	group2	group3	group4
	6.25mM	0	0	0	0		0	0	4		αS:	1.30154	9.90178	2.6195	1.30154
	12.5mM	0	0	0	0		0	0	4		MAT	757.648	848.886	718.405	757.648
	25mM	0	0	0	0		0	0	4
	50mM	0	0	0	0		0	0	4
	100mM	0	0	0	0		0	0	4
	200mM	0	0	0	0		0	0	4
	400mM	0.3	0	0.1	0.3		17.5	7.5	4
	800mM	0.5	0.3	0.6	0.5		47.5	6.29153	4
Gr5a-GAL4/+
satisfied	sucrose	group1	group2	group3	group4		mean (%)	SEM (%)	number			group1	group2	group3	group4
	6.25mM	0	0	0	0		0	0	4		αS:	1.66427	1.24284	1.48703	1.34343
	12.5mM	0	0	0	0		0	0	4		MAT	377.774	443.399	395.426	441.873
	25mM	0	0	0	0		0	0	4
	50mM	0	0	0	0		0	0	4
	100mM	0.1	0	0	0.1		5	2.88675	4
	200mM	0.1	0.2	0.3	0.2		20	4.08248	4
	400mM	0.6	0.5	0.4	0.4		47.5	4.78714	4
	800mM	0.8	0.7	0.9	0.8		80	4.08248	4
+/UAS-Dop1R1 RNAi
naïve	sucrose	group1	group2	group3	group4		mean (%)	SEM (%)	number			group1	group2	group3	group4
	6.25mM	0	0	0	0		0	0	4		αS:	2.38931	1.37552	1.61808	2.3893
	12.5mM	0	0	0	0		0	0	4		MAT	130.412	192.789	159.889	153.36
	25mM	0	0	0	0		0	0	4
	50mM	0	0	0	0		0	0	4
	100mM	0.3	0.2	0.3	0.2		25	2.88675	4
	200mM	0.8	0.6	0.6	0.7		67.5	4.78714	4
	400mM	1	0.7	0.9	1		90	7.07107	4
	800mM	1	1	1	1		100	0	4
+/UAS-Dop1R1 RNAi
failed	sucrose	group1	group2	group3	group4		mean (%)	SEM (%)	number			group1	group2	group3	group4
	6.25mM	0	0	0	0		0	0	4		αS:	2.84227	2.34886	1.56032	3.10435
	12.5mM	0	0	0	0		0	0	4		MAT	446.326	362.38	362.218	484.988
	25mM	0	0	0	0		0	0	4
	50mM	0	0	0	0		0	0	4
	100mM	0	0	0	0		0	0	4
	200mM	0	0.1	0.2	0		7.5	4.78714	4
	400mM	0.4	0.6	0.6	0.3		47.5	7.5	4
	800mM	0.9	0.9	0.8	0.9		87.5	2.5	4
+/UAS-Dop1R1 RNAi
satisfied	sucrose	group1	group2	group3	group4		mean (%)	SEM (%)	number			group1	group2	group3	group4
	6.25mM	0	0	0	0		0	0	4		αS:	1.30266	1.55306	1.22446	1.37341
	12.5mM	0	0	0	0		0	0	4		MAT	155.163	200.077	233.237	134.155
	25mM	0	0	0	0		0	0	4
	50mM	0	0	0	0		0	0	4
	100mM	0.4	0.2	0.2	0.5		32.5	7.5	4
	200mM	0.6	0.5	0.5	0.6		55	2.88675	4
	400mM	0.8	0.8	0.6	0.9		77.5	6.29153	4
	800mM	1	1	1	1		100	0	4

## Sheet: Figure6-D
Gr5a-GAL4/UAS-Dop2R RNAi
naïve	sucrose	group1	group2	group3	group4		mean (%)	SEM (%)	number			group1	group2	group3	group4
	6.25mM	0	0	0	0		0	0	4		αS:	2.01209	1.75707	2.35141	2.16016
	12.5mM	0	0	0	0		0	0	4		MAT	282.896	422.984	523.087	335.475
	25mM	0	0	0	0		0	0	4
	50mM	0	0	0	0		0	0	4
	100mM	0	0	0	0		0	0	4
	200mM	0.3	0.1	0	0.2		15	6.45497	4
	400mM	0.7	0.5	0.3	0.6		52.5	8.53913	4
	800mM	1	0.8	0.8	1		90	5.7735	4
Gr5a-GAL4/UAS-Dop2R RNAi
failed	sucrose	group1	group2	group3	group4		mean (%)	SEM (%)	number			group1	group2	group3	group4
	6.25mM	0	0	0	0		0	0	4		αS:	1.24284	1.47133	1.70451	1.63153
	12.5mM	0	0	0	0		0	0	4		MAT	443.399	513.367	526.329	562.676
	25mM	0	0	0	0		0	0	4
	50mM	0	0	0	0		0	0	4
	100mM	0	0	0	0		0	0	4
	200mM	0.2	0.1	0	0.1		10	4.08248	4
	400mM	0.5	0.4	0.4	0.3		40	4.08248	4
	800mM	0.7	0.7	0.7	0.7		70	0	4
Gr5a-GAL4/UAS-Dop2R RNAi
satisfied	sucrose	group1	group2	group3	group4		mean (%)	SEM (%)	number			group1	group2	group3	group4
	6.25mM	0	0	0	0		0	0	4		αS:	2.21478	2.0581	1.637	2.21574
	12.5mM	0	0	0	0		0	0	4		MAT	400.222	515.244	477.512	474.324
	25mM	0	0	0	0		0	0	4
	50mM	0	0	0	0		0	0	4
	100mM	0	0	0	0		0	0	4
	200mM	0.1	0.1	0	0.2		10	4.08248	4
	400mM	0.5	0.3	0.5	0.3		40	5.7735	4
	800mM	0.9	0.8	0.7	0.9		82.5	4.78714	4
Gr5a-GAL4/+
naïve	sucrose	group1	group2	group3	group4		mean (%)	SEM (%)	number			group1	group2	group3	group4
	6.25mM	0	0	0	0		0	0	4		αS:	1.67389	1.22306	0.940784	1.29603
	12.5mM	0	0	0	0		0	0	4		MAT	338.135	330.672	303.864	379.664
	25mM	0	0	0	0		0	0	4
	50mM	0	0	0	0		0	0	4
	100mM	0.1	0.1	0.1	0		7.5	2.5	4
	200mM	0.2	0.3	0.5	0.3		32.5	6.29153	4
	400mM	0.6	0.6	0.6	0.5		57.5	2.5	4
	800mM	0.9	0.8	0.7	0.8		80	4.08248	4
Gr5a-GAL4/+
failed	sucrose	group1	group2	group3	group4		mean (%)	SEM (%)	number			group1	group2	group3	group4
	6.25mM	0	0	0	0		0	0	4		αS:	1.30154	9.90178	2.6195	1.30154
	12.5mM	0	0	0	0		0	0	4		MAT	757.648	848.886	718.405	757.648
	25mM	0	0	0	0		0	0	4
	50mM	0	0	0	0		0	0	4
	100mM	0	0	0	0		0	0	4
	200mM	0	0	0	0		0	0	4
	400mM	0.3	0	0.1	0.3		17.5	7.5	4
	800mM	0.5	0.3	0.6	0.5		47.5	6.29153	4
Gr5a-GAL4/+
satisfied	sucrose	group1	group2	group3	group4		mean (%)	SEM (%)	number			group1	group2	group3	group4
	6.25mM	0	0	0	0		0	0	4		αS:	1.66427	1.24284	1.48703	1.34343
	12.5mM	0	0	0	0		0	0	4		MAT	377.774	443.399	395.426	441.873
	25mM	0	0	0	0		0	0	4
	50mM	0	0	0	0		0	0	4
	100mM	0.1	0	0	0.1		5	2.88675	4
	200mM	0.1	0.2	0.3	0.2		20	4.08248	4
	400mM	0.6	0.5	0.4	0.4		47.5	4.78714	4
	800mM	0.8	0.7	0.9	0.8		80	4.08248	4
+/UAS-Dop2R RNAi
naïve	sucrose	group1	group2	group3	group4		mean (%)	SEM (%)	number			group1	group2	group3	group4
	6.25mM	0	0	0	0		0	0	4		αS:	1.80183	1.544	2.19775	1.53893
	12.5mM	0	0	0	0		0	0	4		MAT	276.022	196.744	132.32	176.986
	25mM	0	0	0	0		0	0	4
	50mM	0	0	0	0		0	0	4
	100mM	0.1	0.3	0.3	0.3		25	5	4
	200mM	0.3	0.4	0.8	0.5		50	10.8012	4
	400mM	0.7	0.9	0.9	0.9		85	5	4
	800mM	1	1	1	1		100	0	4
+/UAS-Dop2R RNAi
failed	sucrose	group1	group2	group3	group4		mean (%)	SEM (%)	number			group1	group2	group3	group4
	6.25mM	0	0	0	0		0	0	4		αS:	1.50629	1.67996	2.77891	1.95616
	12.5mM	0	0	0	0		0	0	4		MAT	449.427	465.31	330.609	513.327
	25mM	0	0	0	0		0	0	4
	50mM	0	0	0	0		0	0	4
	100mM	0	0.1	0	0.1		5	2.88675	4
	200mM	0.2	0.1	0.1	0.1		12.5	2.5	4
	400mM	0.4	0.4	0.7	0.3		45	8.66025	4
	800mM	0.8	0.8	0.9	0.8		82.5	2.5	4
+/UAS-Dop2R RNAi
satisfied	sucrose	group1	group2	group3	group4		mean (%)	SEM (%)	number			group1	group2	group3	group4
	6.25mM	0	0	0	0		0	0	4		αS:	1.88214	1.88179	1.88117	1.88394
	12.5mM	0	0	0	0		0	0	4		MAT	232.808	189.1	211.545	171.841
	25mM	0	0	0	0		0	0	4
	50mM	0	0	0	0		0	0	4
	100mM	0.1	0.1	0.2	0.2		15	2.88675	4
	200mM	0.4	0.6	0.4	0.6		50	5.7735	4
	400mM	0.8	0.8	0.9	0.9		85	2.88675	4
	800mM	1	1	1	1		100	0	4

## Sheet: Figure6-E
Gr5a-Gal4 > UAS-GCaMP6m,																								Gr5a-Gal4 > UAS-GCaMP6m,																					Gr5a-Gal4 > UAS-GCaMP6m,
control																								UAS-Dop1R1 RNAi																					UAS-Dop2R RNAi
naïve								failed								satisfied								naïve							failed							satisfied							naïve
0.06148	0.042318	-0.13069	0.031642	-0.15875	-0.07971	-0.09294		-0.03157	0.023703	0.26715	0.057948	0.0222974	0.001768	-0.03915		0.086655	0.182897	0.100889	0.078924	-0.05123	0.193616	-0.14627		-0.05987	-0.00943	0.100072	0.177689	0.050502	0.007859		0.088133	0.253616	0.157438	0.002768	0.301364	0.016006		-0.12828	-0.23833	0.124817	0.03409	-0.0174	-0.15691		0.036734	-0.11601	0.021897	-0.1891	-0.20486
0.032538	-0.05006	-0.05101	-0.06679	-0.1813	-0.07548	-0.10361		-0.13577	0.029834	0.096632	0.041567	-0.0242932	-0.01099	-0.04377		-0.0342	-0.00833	-0.08244	0.076445	-0.02684	0.249851	-0.11092		-0.01382	-0.13582	-0.0273	0.055982	-0.04565	-0.00554		0.090685	0.191419	0.262404	0.02303	0.143316	-0.02781		-0.16179	-0.17837	0.103996	0.014912	-0.1231	-0.13072		0.055338	-0.13029	-0.00995	-0.1651	-0.15334
-0.06066	0.175563	-0.03391	0.002674	-0.10781	-0.03071	-0.01019		-0.04749	0.0226	0.0766	0.055747	-0.00909666	0.009115	-0.02968		-0.02862	0.046956	0.073463	0.067689	0.070898	0.062855	-0.09341		-0.04454	-0.01861	-0.03502	0.000396	-0.01118	0.010285		0.071399	-0.12952	0.023159	0.011396	0.406933	-0.03435		-0.14676	-0.09628	0.133472	0.01439	-0.09824	-0.12248		0.027981	-0.05832	0.043957	-0.12499	-0.14973
-0.11976	0.214523	-0.1412	-0.04504	0.011236	-0.07931	-0.03934		-0.03261	-0.00913	0.089572	-0.13788	-0.0174798	0.021464	-0.03488		-0.05427	0.099672	-0.00361	0.035894	0.112595	0.095972	-0.04713		-0.03925	-0.06987	-0.07112	-0.04536	-0.07234	-0.00116		0.040957	0.154077	0.010669	0.013193	0.15771	-0.01062		-0.11444	-0.07782	0.086846	0.027183	-0.08084	-0.08471		0.012035	-0.07102	-0.12092	-0.08693	-0.16846
-0.11932	0.085192	0.014127	0.013714	0.267018	-0.1471	-0.0985		-0.03025	0.00083	-0.00284	-0.02192	-0.0620684	0.017477	-0.00888		-0.07731	0.152347	0.060223	0.045054	0.024044	-0.02697	-0.01097		-0.16961	-0.02559	-0.09317	-0.05503	0.073711	-0.00523		-0.10929	0.032464	0.076207	-0.01766	0.043171	-0.01672		-0.08299	-0.01907	0.080502	0.025268	-0.06878	-0.08278		0.030657	-0.11929	0.086849	-0.10431	-0.18034
-0.11756	-0.23442	-0.04993	-0.03912	0.043505	-0.05471	0.018063		-0.02782	0.022508	0.052748	-0.10781	0.00316523	0.035325	-0.0479		-0.03728	-0.11655	0.040112	-0.00624	0.037996	0.052227	0.008441		-0.10547	0.008999	-0.09056	-0.0781	0.0207	0.038615		-0.04028	-0.02417	0.284625	-0.00191	-0.03292	-0.01657		0.018447	-0.01205	0.037343	0.012399	-0.07877	-0.06764		-0.01465	-0.08741	0.01655	-0.08476	-0.1786
0.010664	-0.0852	0.024315	0.043772	-0.0582	-0.06935	0.076243		0.036693	0.033735	-0.00031	0.047109	0.0518488	-0.03811	-0.02018		-0.06875	-0.06364	0.034744	0.034646	-0.00586	0.106757	-0.0087		0.008892	0.11884	-0.0869	-0.05111	0.024751	-0.00889		0.00381	-0.05903	-0.07838	-0.0213	-0.15239	-0.01499		0.068353	0.017317	0.056578	0.025993	0.037502	-0.07062		-0.03414	-0.0418	-0.03597	-0.04562	-0.12906
0.028226	-0.21326	0.018066	0.052122	-0.09717	-0.03469	0.021929		0.074808	-0.00699	-0.01407	0.090871	-0.00983601	-0.01211	-0.03395		-0.08026	0.000619	-0.00589	-0.03807	0.082712	-0.08218	0.019884		-0.0032	0.093691	-0.06525	-0.04522	0.228226	0.00446		0.006658	-0.07029	-0.17643	0.008818	0.0815	0.012024		0.144787	0.019271	0.091808	-0.00243	0.073924	-0.03413		-0.01379	-0.03205	-0.01628	-0.04502	-0.06235
0.032426	0.2132	0.036814	-0.09237	0.073328	-0.08913	0.006692		0.068718	0.011324	0.038813	0.08264	0.0541351	-0.00334	0.006594		-0.13324	0.021143	0.064813	0.013241	0.077268	-0.17195	0.043409		-0.00949	0.005185	-0.05913	-0.05706	-0.01633	0.011408		0.060362	-0.05276	-0.10485	0.003958	-0.16952	0.018278		0.154412	0.036896	-0.03502	-0.01154	-0.00903	0.01084		-0.0302	0.029731	-0.01288	0.017225	-0.08401
0.074318	0.004039	-0.04353	0.030459	-0.00195	0.060815	-0.00962		0.114196	0.017976	0.063209	-0.03471	0.0146309	-0.01941	0.012991		-0.0251	-0.10818	0.007178	0.007091	0.129979	0.019662	0.026911		0.060419	-0.16485	0.032721	-0.01667	0.0294	0.011602		0.052172	-0.12637	-0.03558	0.006489	-0.29266	0.0561		0.126945	0.080936	-0.09331	-0.03289	-0.00857	0.028839		-0.07043	0.005837	0.045105	0.037764	0.022843
0.066476	-0.18175	0.025679	0.079583	0.017524	0.085275	-0.01012		0.052865	-0.05239	0.003179	-0.18906	0.00975115	-0.02892	-0.02142		-0.12442	-0.09913	0.087594	-0.04708	0.006169	-0.03531	0.035797		0.073459	0.014495	0.012245	-0.01765	0.028733	-0.03901		-0.14644	-0.07761	-0.15917	0.014137	-0.12605	0.016904		0.142728	0.094015	-0.12297	-0.01479	0.155096	0.028194		-0.03065	0.077165	-0.00436	0.084321	0.080595
0.069622	-0.16692	-0.01666	0.028766	-0.0582	0.110537	0.120209		0.046399	-0.05072	-0.1129	-0.04131	-0.0706677	0.009629	0.047941		-0.07666	0.05892	-0.25671	-0.05263	-0.1131	-0.09727	0.061209		0.013783	0.004021	0.06501	0.023102	-0.0469	-0.00179		0.073654	-0.09183	-0.1075	-0.00823	0.034404	-0.00492		0.079663	0.068639	-0.10815	-0.02053	0.067335	0.03755		-0.07323	0.096369	0.078532	0.157362	0.002245
0.010706	-0.16549	0.002002	-0.00913	-0.01935	0.201992	-0.0077		0.004711	-0.01703	-0.15173	0.101058	0.0363337	-0.04208	0.068317		0.120805	0.085433	-0.10314	-0.09564	-0.06416	-0.14201	0.076405		0.210379	0.028588	0.066864	0.012211	-0.24416	-0.0056		-0.04093	0.386692	0.009334	-0.01535	-0.25074	-0.01152		0.04239	0.116029	-0.13083	-0.00224	0.037875	0.136406		-0.0529	0.084557	-0.0265	0.15621	0.174067
-0.0089	0.096348	0.168203	-0.02878	0.14643	0.143091	0.078562		0.135344	-0.02607	-0.18345	-0.05199	-0.000315419	-0.00516	0.093146		0.249425	-0.09985	-0.13396	-0.06689	-0.06481	-0.03799	0.063784		0.153966	0.06253	0.095281	0.043784	-0.10482	-0.02174		-0.042	0.679187	-0.07967	-0.0115	-0.03679	0.013539		-0.02657	0.127176	-0.06971	-0.02594	0.115442	0.18376		-0.06153	0.133886	0.018055	0.166936	0.409552
0.039739	0.008782	0.177709	-0.0015	0.123677	0.058479	0.050308		0.100006	-0.00018	-0.2226	0.10774	0.0548403	0.005032	0.092958		0.283217	-0.15231	-0.0716	-0.05244	-0.21566	-0.18725	0.081556		0.190942	0.087808	0.156249	0.05304	0.011027	0.004732		-0.0436	0.506817	-0.08226	-0.00785	-0.10733	0.004643		-0.11688	0.061647	-0.15537	-0.04386	-0.00244	0.324405		-0.04848	0.228638	-0.08409	0.226016	0.621452
2.37704	0.850717	2.56807	1.56231	0.279323	1.05465	0.624253		0.807852	0.646471	0.371949	0.783402	0.446959	0.394873	0.193743		1.24564	1.77609	2.08537	0.992245	1.67113	0.859754	1.85724		2.12572	1.06998	2.33044	0.118813	0.124826	2.09258		2.79194	0.471841	0.413133	1.33794	0.900566	1.96696		3.36729	1.34032	0.335222	1.87723	2.08744	0.943261		2.13668	0.67203	2.4585	0.489779	0.891476
2.57612	0.022557	3.51396	3.51181	1.18578	2.0532	3.46941		0.539613	0.511059	0.909174	1.69368	-0.335174	0.371107	0.273521		3.5507	2.96243	1.87217	0.544102	1.86421	1.23561	3.57372		3.27509	1.04819	3.08924	0.837313	0.943561	2.4725		2.89122	0.368546	0.751067	1.45934	1.35404	3.62316		3.40137	1.53232	1.20799	2.70248	2.6314	0.963278		2.73277	0.71904	1.81942	1.30321	1.10574
1.0211	-0.16703	3.36948	2.65426	0.626384	1.65606	3.02477		0.402933	0.808536	0.515235	0.670126	-0.432598	0.331541	0.374671		1.38837	2.67236	1.14175	0.109562	0.981608	0.62143	3.14945		3.01012	1.27906	1.47173	0.803835	0.476433	1.93906		2.39964	0.465646	0.744559	1.2147	0.806007	2.81345		3.30904	0.970779	0.865935	1.71017	1.64085	0.934439		2.03446	0.606308	0.52033	1.29211	1.0778
0.271609	-0.13555	1.16662	3.18675	0.448744	0.631996	2.9746		0.269334	0.885096	0.322104	0.219223	-0.404753	0.354923	0.340611		1.03048	1.77178	0.220747	-0.01912	0.690016	0.412469	2.42469		2.31039	0.914041	2.26655	0.652869	0.057809	0.657084		2.20019	0.284373	0.675318	0.919162	0.751449	3.07687		3.0047	0.791392	0.734033	0.861066	1.39625	0.73737		0.888293	0.336829	0.148673	1.11021	1.08682
-0.05639	0.201349	0.586137	2.15651	0.807376	0.293433	2.11706		0.22361	0.670667	0.014662	0.56068	-0.426285	0.477918	0.266063		0.291012	0.375121	-0.02309	-0.12049	0.57237	0.164357	1.71019		0.975395	0.37602	1.6517	0.530999	0.200379	0.21352		1.92711	0.103807	-0.00745	0.698553	0.366402	2.30634		2.67741	0.6431	0.466309	0.415685	0.720027	0.492395		0.362647	0.245822	0.039442	1.02709	1.13711
-0.23239	0.18362	0.269601	0.717749	0.831009	0.309605	1.47678		0.214323	0.559501	-0.29253	0.286048	-0.411305	0.479034	0.139395		0.554653	-0.02806	-0.13604	-0.08099	0.4437	0.396541	1.39491		0.521173	0.534155	1.29209	0.422152	-0.0825	0.154345		1.59604	0.240689	-0.24684	0.574809	-0.35313	1.52037		2.19585	0.551212	0.358195	0.211069	0.596052	0.223458		0.258152	0.097183	-0.10936	0.7947	0.816113
-0.23136	-0.45332	0.175509	0.419783	0.349489	0.29864	1.57922		0.159993	0.371796	-0.31066	0.133329	-0.489528	0.17881	0.092357		0.359788	-0.10398	-0.21996	-0.14232	0.320291	0.182175	1.32564		0.30922	0.219566	1.15004	0.447261	-0.24935	0.11947		1.42378	-0.01785	0.056695	0.384008	-0.60998	1.48608		1.67965	0.675434	0.060021	0.167782	0.85494	-0.03199		0.166463	0.045907	0.036986	0.599151	0.73739
-0.36924	-0.37757	0.178017	0.302494	0.162797	0.298997	1.2781		0.182934	0.158558	-0.37726	0.048005	-0.297751	0.025669	0.092015		0.32618	-0.17323	-0.14998	-0.10173	0.304371	0.160972	1.27888		0.194832	0.207735	0.972004	0.478255	-0.37257	0.094592		1.05675	-0.05159	0.063095	0.291095	-0.61389	0.972774		1.14723	1.10624	-0.01189	0.033751	0.464826	-0.24095		0.019045	0.122823	-0.06872	0.486763	0.707705
-0.28215	-0.34912	0.205941	0.290248	0.179139	0.378073	1.20114		0.123382	0.026642	-0.29691	0.00897	-0.231562	-0.04585	0.097582		0.343261	-0.25744	-0.22442	-0.211	0.319524	0.061491	1.15248		0.065389	0.143214	0.79366	0.418889	-0.44013	0.064122		1.18469	-0.14717	0.011645	0.225986	-0.69076	0.573674		0.784928	0.910667	-0.05756	0.031207	0.51923	-0.39081		0.003053	0.095407	-0.08737	0.551889	0.69918
-0.27147	-0.2582	0.089075	0.224773	0.232351	0.297881	1.10648		-0.00753	0.025405	-0.43624	0.014756	-0.144273	-0.07013	0.090313		0.335786	-0.24945	-0.20311	-0.15594	0.327415	-0.07363	1.02285		0.015507	0.256804	1.26505	0.464113	-0.49414	0.06601		1.23828	-0.11608	0.005849	0.209583	-0.65544	0.683568		0.466774	0.781541	-0.22648	-0.0145	0.497643	-0.47485		-0.07843	0.033745	-0.11724	0.498594	0.564697
-0.1987	-0.53943	0.193905	0.13367	0.144619	0.331342	1.23456		-0.09991	0.019391	-0.43455	0.020216	-0.0491127	-0.03603	0.102253		0.333634	-0.19103	-0.14069	-0.14796	0.328811	-0.11826	0.998885		-0.15405	0.16694	1.18087	0.500949	-0.28512	-0.02704		1.28795	-0.1791	-0.03479	0.170503	-0.69263	0.693177		0.196892	0.56648	-0.127	-0.00676	0.414647	-0.5655		-0.15521	-0.03104	-0.07838	0.497888	0.37769
-0.16358	-0.43236	0.136297	0.196988	0.161794	0.338052	1.30349		-1.05132	-0.08971	-0.41877	-0.06348	-0.103188	-0.11243	0.242265		0.287228	-0.22743	-0.22336	-0.14965	0.348493	-0.02637	1.07519		0.12572	0.110694	1.53537	0.479632	-0.35291	-0.00433		0.779691	-0.12354	-0.15513	0.168354	-0.69846	0.602947		0.059467	0.505709	-0.18135	0.010244	0.424095	-0.61169		-0.13505	-0.04015	-0.09866	0.501363	0.259574
-0.18921	-0.00728	0.208516	0.078585	0.003309	0.306004	1.17615		-1.01419	-0.0609	-0.38829	-0.10105	0.0101038	-0.07858	0.20457		0.348145	-0.26262	-0.16901	-0.1678	0.429485	-0.00136	1.0076		0.044301	0.11897	1.22014	0.480682	-0.42563	0.005018		0.613893	-0.22213	-0.27328	0.127112	-0.82201	0.526038		-0.07073	0.473854	-0.17757	-0.0179	0.481524	-0.64242		-0.17044	-0.05446	-0.03514	0.458162	0.149174
-0.19434	-0.15006	0.224337	0.077797	-0.10771	0.538369	0.939417		-0.68189	-0.06636	-0.27984	-0.0612	0.0601636	-0.08363	0.15656		0.320819	-0.33764	-0.20956	-0.15939	0.281476	-0.08515	0.98499		-0.14047	0.147287	0.977287	0.457774	-0.46776	0.026724		0.610095	-0.07551	0.006812	0.129825	-0.72407	0.44559		-0.17897	0.404125	-0.11635	-0.00428	0.703991	-0.67087		-0.17372	-0.05865	-0.11902	0.489107	0.079537
-0.25449	-0.38928	0.269799	0.118733	-0.15694	0.51144	0.977173		-0.75084	-0.27176	-0.3805	0.026165	0.0359584	-0.06616	0.148861		0.359072	-0.26817	-0.17387	-0.25902	0.226947	-0.19384	0.818123		-0.07637	0.047014	0.987706	0.481657	-0.2495	0.0413		-0.07826	-0.22725	-0.00178	0.15419	-0.67689	0.413428		-0.21801	0.332085	0.347139	-0.01026	0.505847	-0.6852		-0.17744	-0.05315	-0.08421	0.385327	0.005543
-0.15764	-0.33714	0.167213	0.031062	-0.14649	0.474096	0.995802		-0.91259	-0.08128	-0.37219	0.025269	0.0397689	-0.01279	0.097771		0.357376	-0.28891	-0.16344	-0.20301	0.24839	-0.07182	0.821037		-0.15765	0.18543	1.22014	0.482461	-0.44399	0.004181		-0.12805	-0.10827	-0.23985	0.103181	-0.51734	0.551068		-0.29358	0.384747	0.212518	0.021236	0.709005	-0.69295		-0.15888	-0.00862	-0.00111	0.330228	-0.08563
Gr5a-Gal4 > UAS-GCaMP6m,				Gr5a-Gal4 > UAS-GCaMP6m,				Gr5a-Gal4 > UAS-GCaMP6m,
control				UAS-Dop1R1 RNAi				UAS-Dop2R RNAi
naive	failed	satisfied		naive	failed	satisfied		naive	failed	satisfied
2.57612	0.807852	2.96243		3.08924	3.62316	2.70248		3.88024	2.55103	2.37839
3.51396	1.69368	3.5507		2.4725	1.45934	2.6314		1.30321	1.99992	1.12085
1.18578	0.909174	1.86421		0.837313	1.35404	1.20799		1.10574	1.46483	4.01697
0.850717	0.374671	1.23561		0.943561	0.679187	0.963278		0.71904	0.954723	0.757558
2.0532	0.446959	0.992245		1.27906	0.751067	1.53232		2.4585	0.491347	0.976992
3.51181	0.885096	2.08537		3.27509	2.89122	3.40137		2.73277	3.24009	2.32584
3.46941	0.479034	3.57372
[truncated: 13 more columns]
